# Supplementary material
Source: publisher site journal article supplement (https://www.spandidos-publications.com/4654/downloadSupplementary)
Supplement: Supplementary file 1 [file downloadSupplementary]

## Sheet: Sheet1
Table SIV. Results of Gene Ontology biological pathway enrichment analysis.
Category	Term	Count	%	P-value	Genes	List Total	Pop Hits	Pop Total	Fold Enrichment	Bonferroni	Benjamini	FDR
GOTERM_BP_DIRECT	GO:0006260~DNA replication	85	1.50389	1.19869e-10	FEN1, MCM7, MCM8, DSCC1, MCM10, BRCA1, CHTF18, CHAF1B, HELB, CHAF1A, EXO1, SIN3A, TOP1MT, CHEK1, TOPBP1, POLE, POLG, RFC5, TIPIN, RMI2, SUPT16H, RFC3, RFC4, LIG1, RMI1, NCOA6, RFC2, TOP3A, REV1, WRNIP1, CDC25C, SIRT1, CDC25A, MCM3, TIMELESS, RBMS1, MCM4, MCM5, NUP98, MCM6, DNA2, TOP1, DTL, MCM2, RHNO1, BLM, SET, RNASEH2A, NFIX, PCNA, ORC5, RECQL4, POLD3, ORC6, CDC45, ORC1, POLD1, POLD2, CLSPN, DT…	4969	155	16792	1.85319	9.60153e-07	9.60153e-07	9.54519e-07
GOTERM_BP_DIRECT	GO:0008283~cell proliferation	165	2.91932	3.43503e-10	KDM1A, TUSC2, CSE1L, IRS2, GRPR, MKI67, FGF1, EDNRA, DACH1, FRAT2, MYC, OGFOD1, LIPG, PIM1, PIM2, SKP2, GLUL, CDK5RAP3, IFNAR2, IL15RA, IGFBP4, SERPINF1, ENTPD5, SCRIB, PDZK1, MIF, CDC25C, CDC25A, TRAIP, AR, MELK, DKC1, DDIT4, HOXB4, UBE2V2, PRKD1, RAF1, CUL5, PRKDC, INSIG1, SH2D2A, CUL1, TACSTD2, TGFA, PDS5B, TXN, ZFP36L2, ZFP36L1, LARP1, THPO, PRDX1, UBR5, NDP, SRGAP2, FAM83D, MYH10, TSPAN1, FA…	4969	366	16792	1.52348	2.75145e-06	1.37573e-06	1.36766e-06
GOTERM_BP_DIRECT	GO:0051301~cell division	157	2.77778	1.46763e-09	RB1, DCLRE1A, ERCC6L, ZWILCH, CIB1, NR3C1, SMC4, SMC2, CDC20, CCND2, PTTG1, CHEK2, RUVBL1, CDK20, ZNF207, RCC1, NEK1, KNTC1, OIP5, NEK2, KMT5A, FBXO5, TIPIN, BORA, LIG1, PRKCE, NSMCE2, ANXA11, VRK1, KNL1, CDC25C, KNSTRN, CDC25A, KLHL42, CDC25B, SGO1, SGO2, CDC34, CCNE2, CCNE1, ZW10, TIMELESS, ANAPC4, CCNO, ANAPC1, MAD1L1, LLGL2, ANAPC13, SEH1L, TSG101, CDCA2, CDCA3, ANAPC16, CDCA4, CDCA7, CDCA8, …	4969	350	16792	1.51588	1.17557e-05	3.91858e-06	3.89559e-06
GOTERM_BP_DIRECT	GO:0006270~DNA replication initiation	27	0.477707	2.07289e-09	PRIM2, MCM7, PRIM1, MCM10, ORC5, PURA, ORC6, CDC45, ORC1, TOPBP1, POLE, GINS4, CDC7, LRWD1, CDC6, POLA1, POLA2, CDC34, CCNE2, CCNE1, POLE2, RPA4, MCM3, MCM4, MCM5, MCM6, MCM2	4969	32	16792	2.85133	1.66037e-05	4.06235e-06	4.03852e-06
GOTERM_BP_DIRECT	GO:0000082~G1/S transition of mitotic cell cycle	60	1.06157	2.5358e-09	RB1, USP37, CDKN1B, MCM7, CCNH, MCM8, MCM10, PPAT, RCC1, FBXO5, PIM2, SKP2, POLE, ACVR1, CDC25A, PIAS1, CDC34, CCNE2, CCNE1, MCM3, MCM4, MCM5, MCM6, BCAT1, MCM2, PRIM2, PCNA, CUL5, PRIM1, CUL2, CUL1, PKMYT1, TYMS, ACVR1B, IQGAP3, GSPT1, ORC5, ORC6, CDC45, ORC1, EIF4EBP1, CAMK2G, CDKN2D, RANBP1, CDKN2C, RRM2, CDKN2A, PLK2, CDC7, CDC6, DHFR, POLA1, POLA2, CDK4, POLE2, RPA4, CDK2, CDK1, CRLF3, CDKN3	4969	102	16792	1.98785	2.03116e-05	4.06235e-06	4.03852e-06
GOTERM_BP_DIRECT	GO:0007062~sister chromatid cohesion	60	1.06157	4.23067e-09	ERCC6L, NUP107, ZWILCH, CDC20, XPO1, NUF2, KNTC1, SPDL1, FBXW7, DDX11, KNL1, KIF22, RANGAP1, CKAP5, SMC1B, SGO1, SGO2, RAD51C, KIF2A, INCENP, ZW10, BIRC5, KIF2C, NUP98, MAPRE1, MAD1L1, PAFAH1B1, SEH1L, CDCA8, PDS5B, CENPA, NSL1, NUP160, AURKB, SKA2, NUP85, RAD21, MCMBP, BUB1, CLASP2, RCC2, PLK1, REC8, NDC80, ZWINT, CENPE, KIF18A, STAG1, CENPF, CENPH, CENPI, CENPK, CENPL, CENPM, CENPN, CENPO, CENP…	4969	103	16792	1.96855	3.38871e-05	5.64795e-06	5.61481e-06
GOTERM_BP_DIRECT	GO:0042493~response to drug	135	2.38854	4.69996e-08	CD86, ABAT, COMT, SRP14, AQP1, CDH3, PNP, MYC, DPYSL2, HADH, JUNB, SPINK4, CPT1A, CYBA, POR, ADAM17, SFRP2, RPP21, TXNIP, CCNO, ABCG2, ABCB1, RPN2, SLC1A3, TGFA, LPL, XPC, TNFRSF11B, GATA3, ACACB, SLC9A1, LDHA, CCNB1, MYO6, DVL3, APOD, NCKAP1L, FZD1, LYN, TFAP2B, CBX7, JUN, UBE2B, SRD5A1, ABCA3, GGH, MTHFR, FOSL1, COL1A1, CPS1, CDK4, BCL2, LCN2, CDK1, GNAS, CALR, GCLM, PAM, ADA, SLC26A5, BCAR3, C…	4969	304	16792	1.5007	0.000376396	5.37809e-05	5.34654e-05
GOTERM_BP_DIRECT	GO:0007067~mitotic nuclear division	111	1.96391	4.9954e-07	DCLRE1A, ERCC6L, ZWILCH, NR3C1, CDC20, PTTG1, TUBB3, RUVBL1, RCC1, NEK1, KNTC1, OIP5, NEK2, KMT5A, FBXO5, TIPIN, BORA, NSMCE2, VRK1, KNL1, CDC25C, GEM, CDC25A, KLHL42, CDC25B, EML4, SGO1, ZW10, SRSF2, TIMELESS, ANAPC4, ANAPC1, ANAPC13, CDCA2, CDCA3, ANAPC16, NOLC1, PKMYT1, ANAPC11, SKA2, CCNB2, VCPIP1, RAD21, MCMBP, NUP88, FAM83D, SAC3D1, UBE2I, NEK6, RCC2, SETDB2, PLK1, CDC6, NDC80, ANLN, TPX2, …	4969	248	16792	1.51253	0.00399332	0.000500164	0.000497229
GOTERM_BP_DIRECT	GO:0016925~protein sumoylation	61	1.07926	6.65576e-07	TOP2A, MDC1, NUP107, NUP188, BRCA1, BMI1, IFIH1, SENP5, TRIM28, SUMO3, NUP62, NFATC2IP, NDC1, NUP210, RING1, NSMCE2, NSMCE1, MITF, RANGAP1, PIAS2, PIAS1, NUP93, NSMCE4A, INCENP, NUP50, BIRC5, NUP98, TOP1, BLM, NUP205, SEH1L, PCNA, CDCA8, XPC, NUP160, AURKB, RNF212, POM121C, NUP85, TDG, RAD21, NUP88, TP53BP1, RAE1, TRPM4, CBX8, NOP58, UBE2I, PHC1, NUP155, CDKN2A, BCL11A, PCGF2, CBX2, NUP153, PHC3,…	4969	117	16792	1.76188	0.00531708	0.000592363	0.000588887
GOTERM_BP_DIRECT	GO:0071230~cellular response to amino acid stimulus	31	0.548478	1.18972e-06	CEBPB, DNMT1, COL16A1, TNF, RPTOR, SOCS1, SESN1, PDGFD, PDGFC, SH3BP4, NTRK2, XBP1, MMP2, ASS1, COL1A1, COL3A1, RRAGA, CPEB1, ZEB1, COL1A2, RRAGC, COL4A1, RRAGB, COL5A2, COL6A1, RRAGD, COL4A6, HNRNPD, CPEB3, LAMTOR4, LAMTOR3	4969	47	16792	2.22893	0.00948436	0.000952962	0.000947371
GOTERM_BP_DIRECT	GO:0051726~regulation of cell cycle	62	1.09696	3.24815e-06	RB1, LIN54, CCNI, PTEN, FOXM1, FGF2, MECOM, CDK20, SKP2, BTRC, JUNB, CDKL3, TSC1, MASTL, CDC25C, CDC25A, OVOL2, BCR, RAD51D, RBL1, CCNE2, CCNE1, IRF1, SRSF5, DTL, PRR11, L3MBTL1, LIN37, UHRF2, SRC, LIN9, PKMYT1, CCNDBP1, CCNB2, MNT, CCNB1, GRK5, PES1, FIGNL1, E2F2, BAK1, E2F5, JUN, CDK19, MX2, PLK1, STAT3, MOK, CABLES2, GADD45G, PER2, CDK8, BOP1, CENPF, COPS5, CCNG2, LEP, CCNG1, ID3, CDK12, CDK14…	4969	124	16792	1.68968	0.0256822	0.00231615	0.00230256
GOTERM_BP_DIRECT	GO:0045944~positive regulation of transcription from RNA polymerase II promoter	355	6.28096	3.46988e-06	RB1, APP, PID1, SMARCB1, CCNH, EIF4A3, GABPB1, IKZF3, ELK1, ELK3, RPS6KA4, RPS6KA5, SOX17, TRIM28, SOX18, CREB3L4, MYC, SOX15, ZMIZ2, MYB, HOXA2, EPC1, JUNB, SOX4, HOXA5, CDK5RAP3, TP63, ACVR1, MEF2A, DDX17, MEF2C, EBF1, EBF2, SOX11, EBF3, MED6, OVOL2, RUNX1, HCFC1, AR, SFRP2, IL23A, DDIT3, SUB1, HOXB4, PRKD1, PFN1, ATF5, ZFPM2, SKAP1, HOXB5, ATF4, BEX1, PRKDC, EPAS1, CTR9, WDR61, GATA3, PIK3R1, …	4969	981	16792	1.22291	0.0274111	0.00231615	0.00230256
GOTERM_BP_DIRECT	GO:0002479~antigen processing and presentation of exogenous peptide antigen via MHC class I, TAP-dependent	37	0.654636	4.69017e-06	PSMD12, PSMD11, PSMD14, ITGB5, NCF1, PSMD13, NCF4, PSMB10, PSMA7, PSMD8, PSMB6, PSMB7, PSMB4, PSMD7, PSMB5, PSMB2, PSMB3, PSMD2, PSMD3, PSMB1, PSMD1, ITGAV, CD36, FCGR1A, HLA-B, CYBA, HLA-F, HLA-G, PSMB9, PSMA5, PSMA6, PSMA3, PSMA4, PSMC3, PSMC2, PSME4, PSME2	4969	63	16792	1.9847	0.0368714	0.00288987	0.00287291
GOTERM_BP_DIRECT	GO:0016032~viral process	125	2.21161	6.72807e-06	RB1, EIF4A2, NUP107, NUP188, GTF2B, UBE3A, RCC1, BTRC, TRIM23, ACOT8, CD93, NUP210, FBXW7, MAGI3, DDX11, HLA-B, KRT7, SCRIB, CDC25C, SND1, MSH6, NUP93, CLDN9, CCDC86, VDAC1, NUP98, IL6ST, NUP205, SEH1L, SET, NLRX1, CUL5, CUL2, CUL1, FBLN1, PIK3R1, GTF2E1, NUP160, HPX, POM121C, NUP85, TSPAN7, NUP88, PLCG1, AP1M1, LYN, FDPS, CREBBP, UBE2I, CBX5, NUP155, NUP153, PILRA, SRPK1, UCKL1, POLA1, HNRNPK, N…	4969	299	16792	1.41277	0.0524656	0.00384942	0.00382683
GOTERM_BP_DIRECT	GO:0051437~positive regulation of ubiquitin-protein ligase activity involved in regulation of mitotic cell cycle transition	42	0.7431	7.57528e-06	PSMD12, PSMD11, ANAPC16, PSMD14, PSMD13, CUL1, PSMB10, PSMA7, ANAPC11, PSMD8, CDC20, PSMB6, PSMB7, CCNB1, PSMB4, PSMD7, PSMB5, PSMB2, PSMB3, PSMD2, PSMD3, UBC, PSMB1, PSMD1, FBXO5, BTRC, SKP1, UBE2C, PLK1, PSMB9, PSMA5, PSMA6, PSMA3, PSMA4, PSMC3, PSMC2, PSME4, CDK1, PSME2, ANAPC4, ANAPC1, MAD2L1	4969	76	16792	1.86754	0.058874	0.00392032	0.00389732
GOTERM_BP_DIRECT	GO:0006281~DNA repair	102	1.80467	7.83085e-06	SMARCB1, TRRAP, NUDT1, CDC14B, RDM1, ALKBH2, HELB, EME1, PTTG1, TRIM28, RUVBL2, ALKBH1, CHEK1, RUVBL1, FBXO6, MEN1, GEN1, SUPT16H, LIG1, DDX11, NSMCE1, REV1, CSNK1D, MSH6, NEIL2, MSH2, MSH3, FANCD2, PSME4, SLX1A, PIF1, BLM, VCP, PARPBP, XPC, PDS5B, RAD51AP1, UBR5, CLSPN, FANCI, UBE2B, NONO, XRCC3, FANCC, UBE2A, FANCG, POLA1, UBE2T, CDK2, CDK1, SPRTN, RAD17, RAD9A, RPAIN, MUS81, BTG2, FEN1, BRCA1,…	4969	235	16792	1.46678	0.0607986	0.00392032	0.00389732
GOTERM_BP_DIRECT	GO:0031145~anaphase-promoting complex-dependent catabolic process	43	0.760793	9.57895e-06	PSMD12, PSMD11, ANAPC16, PSMD14, PSMD13, PSMB10, PSMA7, AURKB, AURKA, ANAPC11, PSMD8, CDC20, PSMB6, PSMB7, CCNB1, PSMB4, PSMD7, PSMB5, PTTG1, PSMB2, PSMB3, PSMD2, PSMD3, UBC, PSMB1, PSMD1, SKP2, UBE2C, PLK1, PSMB9, PSMA5, PSMA6, PSMA3, PSMA4, PSMC3, UBE2S, PSMC2, PSME4, CDK1, PSME2, ANAPC4, ANAPC1, MAD2L1	4969	79	16792	1.83939	0.073858	0.00451338	0.00448689
GOTERM_BP_DIRECT	GO:0098609~cell-cell adhesion	114	2.01699	1.26304e-05	RPL34, PARK7, ENO1, BZW2, RPL6, CRKL, BAIAP2L1, PPME1, RUVBL1, ARFIP1, SH3GL1, TMPO, CAST, SH3GLB2, CSNK1D, SND1, HCFC1, ATXN2L, CHMP4B, TAGLN2, RPL29, PFN1, PHLDB2, LRRC59, MACF1, TACSTD2, UBFD1, ZC3HAV1, EVPL, PPL, NDRG1, CNN3, CCNB2, LDHA, SNX1, KLC2, LARP1, SNX2, FLRT3, PRDX1, MYO6, STK38, SFN, ARGLU1, SPTBN1, S100A11, MARK2, GCN1, SNX5, SPTBN2, VASP, HSPA5, EEF2, PAICS, VASN, EHD1, ANLN, HNR…	4969	271	16792	1.42157	0.0962208	0.00562053	0.00558755
GOTERM_BP_DIRECT	GO:0000281~mitotic cytokinesis	21	0.37155	1.33896e-05	PLK1, CKAP2, KIF23, SNX33, CENPA, ANLN, SPAST, RACGAP1, RASA1, KIF4A, STMN1, NUSAP1, CHMP4B, MITD1, KIF20A, STAMBP, MYH10, BBS4, SPTBN1, CEP55, ZNF365	4969	29	16792	2.44712	0.1017	0.00564478	0.00561166
GOTERM_BP_DIRECT	GO:0070125~mitochondrial translational elongation	45	0.796178	1.45595e-05	MRPS17, MRPS15, MRPS36, MRPS14, MRPS33, MRPL18, MRPS12, MRPS31, MRPL38, MRPL16, MRPL17, MRPS10, MRPL58, MRPL36, MRPL14, MRPS30, MRPL15, MRPL37, MRPL12, MRPL13, MRPL35, MRPL54, MRPL11, MRPL55, MRPL4, MRPL3, MRPL42, MRPL2, MRPL9, GADD45GIP1, TSFM, MRPS26, MRPS27, MRPS22, MRPS23, MRPS18A, MRPL28, MRPL47, MRPL48, MRPS7, MRPS5, MRPL21, MRPL44, MRPS9, MRPL51	4969	85	16792	1.78907	0.110079	0.0058311	0.00579688
GOTERM_BP_DIRECT	GO:0043488~regulation of mRNA stability	52	0.920028	1.60206e-05	PSMD8, ZFP36, PSMD7, XPO1, PSMD2, KHSRP, PSMD3, PSMD1, TNPO1, DIS3, YWHAZ, PSMA5, PSMA6, CARHSP1, PSMA3, PSMA4, PSME4, PSME2, PABPC1, RBM24, PSMD12, SET, PSMD11, PSMD14, PSMD13, ZFP36L2, PSMA7, PSMB10, ZFP36L1, PSMB6, PSMB7, PSMB4, EXOSC5, PSMB5, EXOSC4, PSMB2, PSMB3, EXOSC9, UBC, PSMB1, EXOSC3, ZC3H14, EXOSC2, EXOSC1, TNFSF13, SAMD4A, SAMD4B, PSMB9, PSMC3, PSMC2, HNRNPD, EIF4G1	4969	103	16792	1.70608	0.120433	0.00611072	0.00607486
GOTERM_BP_DIRECT	GO:0032355~response to estradiol	47	0.831564	2.0915e-05	FOXA1, GPI, UCN, RAMP2, CDKN1B, PCNA, PTEN, OPRL1, PTN, SLC6A4, SOCS2, CASP9, CST3, MYC, CASP3, PENK, DNMT3B, CD38, BID, NCOA1, PDGFRB, ESRRA, STAT5B, ARNT2, POSTN, KCNJ11, DUSP1, STAT3, NR2F2, EEF2, BMP7, ESR1, ASS1, COL1A1, F7, CD4, TH, IFI27, MMP15, ALDH1A2, LEP, CAT, TXNIP, CALR, PAM, FGF10, EZH2	4969	91	16792	1.74538	0.154249	0.00761495	0.00757027
GOTERM_BP_DIRECT	GO:0045892~negative regulation of transcription, DNA-templated	191	3.37933	2.24696e-05	RB1, KDM1A, GMNN, ARID4A, HR, RORB, ENO1, TNF, ELK3, RPS6KA5, DACH1, TRIM28, SOX18, MYB, TRIM24, CAPN3, KAT8, EPC1, KMT5A, BTRC, TNFRSF4, SOX7, PITX1, TP63, MEN1, ZGPAT, TLE1, SMARCC2, ZNF282, ZBTB38, ZNF281, WNT5A, ARID5A, KCTD1, ARID5B, RUNX1, OVOL2, FOXP1, DKK3, HIC2, EID1, ZNF91, SFRP2, BRMS1, ZNF93, KAT6B, DDIT3, TIMELESS, TRIB3, ATF5, ZFPM2, TRIM11, ZNF552, MEG3, L3MBTL1, SET, TSG101, NOTCH…	4969	499	16792	1.2935	0.164716	0.00782527	0.00777936
GOTERM_BP_DIRECT	GO:0090090~negative regulation of canonical Wnt signaling pathway	74	1.30927	2.62872e-05	INVS, GSK3B, JADE1, GLI3, PSMD8, PSMD7, SOX17, CDH2, TMEM88, PSMD2, PSMD3, DACT3, PSMD1, SCYL2, IGFBP4, WNT5A, KREMEN2, AXIN2, DKK2, DKK3, PSMA5, SFRP4, PSMA6, PSMA3, SFRP2, PSMA4, DDIT3, PSME4, PSME2, ROR2, PFDN5, AMER1, PSMD12, RGS19, PSMD11, NOTCH1, PSMD14, PSMD13, LEF1, LRP4, STK4, PSMA7, PSMB10, STK3, NKD2, PSMB6, PSMB7, PSMB4, WNT11, PSMB5, PSMB2, FRZB, PSMB3, UBC, PSMB1, GPC3, NPHP3, RGS20…	4969	163	16792	1.53418	0.189872	0.00877335	0.00872187
GOTERM_BP_DIRECT	GO:0006406~mRNA export from nucleus	50	0.884643	3.31147e-05	NUP107, NXT1, NUP188, EIF4A3, SMG7, SMG5, HHEX, MAGOH, NUP62, AGFG1, NDC1, UPF2, EIF5A, NUP210, NCBP1, NCBP2, THOC3, THOC5, NUP93, DDX19A, DDX39A, NUP50, SRSF2, SRSF5, NUP98, SRSF7, SLU7, SRSF9, SLBP, ENY2, NUP205, SEH1L, SRSF1, U2AF1, NUP160, NXF1, FIP1L1, POM121C, NUP85, U2AF2, DHX38, NUP88, RAE1, NUP155, CPSF1, ALYREF, CPSF3, UPF3B, NUP153, NUP37	4969	100	16792	1.68968	0.232988	0.01061	0.0105477
GOTERM_BP_DIRECT	GO:0007077~mitotic nuclear envelope disassembly	27	0.477707	4.42483e-05	NUP205, SEH1L, NUP107, NUP188, NUP160, CCNB2, CCNB1, POM121C, NUP85, NUP62, BANF1, NUP88, EMD, RAE1, NDC1, NUP155, NUP210, NEK6, PLK1, VRK1, NUP153, NUP93, NUP50, CDK1, NUP98, LPIN1, NUP37	4969	44	16792	2.07369	0.298431	0.0136319	0.0135519
GOTERM_BP_DIRECT	GO:0070126~mitochondrial translational termination	44	0.778485	5.36999e-05	MRPS17, MRPS15, MRPS36, MRPS14, MRPS33, MRPL18, MRPS12, MRPS31, MRPL38, MRPL16, MRPL17, MRPS10, MRPL58, MRPL36, MRPL14, MRPS30, MRPL15, MRPL37, MRPL12, MRPL13, MRPL35, MRPL54, MRPL11, MRPL55, MRPL4, MRPL3, MRPL42, MRPL2, MRPL9, GADD45GIP1, MRPS26, MRPS27, MRPS22, MRPS23, MRPS18A, MRPL28, MRPL47, MRPL48, MRPS7, MRPS5, MRPL21, MRPL44, MRPS9, MRPL51	4969	86	16792	1.72897	0.349587	0.0156263	0.0155347
GOTERM_BP_DIRECT	GO:0038061~NIK/NF-kappaB signaling	36	0.636943	5.5592e-05	PSMD12, PSMD11, PSMD14, PSMD13, CUL1, PSMB10, PSMA7, PSMD8, PSMB6, PSMB7, PSMB4, PSMD7, PSMB5, PSMB2, PSMB3, PSMD2, PSMD3, UBC, PSMB1, PSMD1, BTRC, IKBKE, SKP1, RIPK3, NFKB1, PSMB9, NFKB2, PSMA5, PSMA6, PSMA3, PSMA4, PSMC3, PSMC2, PSME4, PSME2, UBE2M	4969	66	16792	1.84328	0.359371	0.0156263	0.0155347
GOTERM_BP_DIRECT	GO:0051436~negative regulation of ubiquitin-protein ligase activity involved in mitotic cell cycle	38	0.672328	5.65748e-05	PSMD12, PSMD11, ANAPC16, PSMD14, PSMD13, PSMB10, PSMA7, ANAPC11, PSMD8, CDC20, PSMB6, PSMB7, CCNB1, PSMB4, PSMD7, PSMB5, PSMB2, PSMB3, PSMD2, PSMD3, UBC, PSMB1, PSMD1, FBXO5, UBE2C, PSMB9, PSMA5, PSMA6, PSMA3, PSMA4, PSMC3, PSMC2, CDK2, CDK1, PSME2, ANAPC4, ANAPC1, MAD2L1	4969	71	16792	1.80867	0.364394	0.0156263	0.0155347
GOTERM_BP_DIRECT	GO:0006369~termination of RNA polymerase II transcription	35	0.61925	6.74205e-05	SLBP, ZNF473, CSTF3, CSTF2, SRSF1, EIF4A3, MAZ, U2AF1, TTF2, FIP1L1, PABPN1, PCF11, U2AF2, CLP1, MAGOH, CSTF1, DHX38, CPSF1, NCBP1, NCBP2, ALYREF, CPSF3, SSU72, UPF3B, THOC3, THOC5, DDX39A, SRSF2, SNRPG, SRSF5, SNRPF, SLU7, SRSF7, SNRPB, SRSF9	4969	64	16792	1.84808	0.417285	0.0180013	0.0178956
GOTERM_BP_DIRECT	GO:0006271~DNA strand elongation involved in DNA replication	13	0.230007	7.82052e-05	GINS2, PRIM2, RFC3, RFC4, PCNA, GINS3, PRIM1, GINS4, POLD3, POLA1, POLA2, POLD1, POLD2	4969	15	16792	2.92877	0.465513	0.0202072	0.0200886
GOTERM_BP_DIRECT	GO:0006977~DNA damage response, signal transduction by p53 class mediator resulting in cell cycle arrest	34	0.601557	8.17698e-05	BTG2, CDKN1B, PCNA, TRIAP1, AURKA, MUC1, CCNB1, CHEK2, UBC, SFN, E2F4, GTSE1, SOX4, E2F7, ZNF385A, RBM38, PRMT1, PLK2, ARID3A, PPP2R5C, CDC25C, TFDP1, RGCC, TFDP2, CNOT11, CNOT1, CARM1, CENPJ, CNOT3, CDK2, CDK1, BAX, CNOT8, CNOT9	4969	62	16792	1.85319	0.480559	0.0203207	0.0202015
GOTERM_BP_DIRECT	GO:0045893~positive regulation of transcription, DNA-templated	193	3.41472	8.37183e-05	RB1, ELK1, ELK3, ZXDA, SOX17, TRIM28, SOX18, MYC, CHEK2, ZXDC, MYB, TRIM24, KAT8, EPC1, BTRC, SOX7, SOX4, TP63, ACVR1, MEF2C, SMARCC2, ZNF281, SOX11, RUNX3, RUNX1, AR, NIF3L1, DDIT3, ATF5, SKAP1, ATF4, MEG3, GATA3, MRPL12, SEC14L2, NUP85, TP53BP1, NKX2-5, FZD1, EGR1, JUN, AFAP1L2, CREBBP, XRCC6, FZD4, SS18L1, NFATC3, PBX4, NR2F2, IGF1, SMARCA2, SMARCA4, COL1A1, HNRNPD, CDKN1C, SETD3, CITED1, CITE…	4969	515	16792	1.26644	0.488604	0.0203207	0.0202015
GOTERM_BP_DIRECT	GO:0000122~negative regulation of transcription from RNA polymerase II promoter	260	4.60014	9.11756e-05	ZNF177, RB1, TCERG1, EHMT2, SLA2, ELK4, EDNRB, SOX17, TRIM28, SOX18, MYC, SOX15, SAP130, MYB, HOXA2, EPC1, JUNB, TP63, MEF2A, HES6, MEF2C, SMARCC2, ZNF281, SOX11, DICER1, RUNX3, HCFC1, EID1, IFI27, DDIT3, HOXB4, HOXB3, TXNIP, TRIB3, ZFPM2, CGGBP1, URI1, TSHZ3, TSHZ1, TSHZ2, CTR9, NEDD4L, GATA3, TXN, ZBTB4, MTDH, HIVEP1, NKX2-5, ELANE, HEXIM2, EGR1, XBP1, CREBBP, BCL11A, PDE2A, PLK1, NR2F1, FZD8, …	4969	720	16792	1.22032	0.51826	0.0214799	0.0213539
GOTERM_BP_DIRECT	GO:0000398~mRNA splicing, via spliceosome	93	1.64544	0.000101225	TXNL4B, EIF4A3, PPWD1, WDR83, YBX1, DDX41, USP39, EFTUD2, PTBP1, SYNCRIP, HELB, SNRPD2, RAVER1, PCF11, SNRNP70, CLP1, SNRPD1, RSRC1, MAGOH, DHX16, CTNNBL1, RBM5, SRRM2, RBM15, NCBP1, NCBP2, BUD31, PRPF4B, PRPF4, DDX39A, SYF2, SRSF2, SNRPG, CD2BP2, GEMIN6, PPIH, SNRPA1, SRSF5, PABPC1, SNRPF, SNRPC, SNRNP200, SRSF7, SLU7, SNRPA, RBM22, SNRPB, SRSF9, SF3B2, SF3B3, CSTF3, SRRT, SRSF1, CSTF2, DDX23, U…	4969	222	16792	1.41567	0.555522	0.0224879	0.022356
GOTERM_BP_DIRECT	GO:0033138~positive regulation of peptidyl-serine phosphorylation	37	0.654636	0.00010145	BCAR3, PPP1R15A, GSK3B, UCN, DOCK7, ARRB1, PARK7, TXN, STK4, TNF, RPTOR, PDCD10, NTF3, FNIP1, STOX1, SNCA, NTRK2, RIPK2, CAV1, WNT5A, OSM, BRAF, MIF, VEGFA, MAD2L2, PINK1, SFRP2, BCL2, SPRY2, PRKD1, CAMK1, AVP, RAF1, GAS6, RAPGEF3, PFN2, EIF4G1	4969	70	16792	1.78623	0.556321	0.0224879	0.022356
GOTERM_BP_DIRECT	GO:0051603~proteolysis involved in cellular protein catabolic process	28	0.4954	0.000103877	CTSZ, IDE, CTSV, PSMB10, PSMA7, PSMB6, PSMB7, CTSO, PSMB4, PSMB5, PSMB2, CTSL, PSMB3, CTSK, PSMB1, LONP1, CTSF, CTSC, CTSA, HSPA5, PSMB9, DNAJC3, PSMA6, PSMA3, PSMA4, FAP, CLPP, LGMN	4969	48	16792	1.97129	0.564864	0.0224879	0.022356
GOTERM_BP_DIRECT	GO:0006364~rRNA processing	90	1.59236	0.000112067	LTV1, DDX49, RPL3, RPL34, DIS3L, EIF4A3, CHD7, PWP2, RPL8, WDR46, RPL9, RPL6, WDR43, RRP9, RPS4X, FBL, NOB1, RPS19, RIOK1, RPS10, RPP38, RPS13, RRP15, RPS9, UTP11, IMP3, DIS3, TEX10, RPL22, DDX56, CSNK1D, IMP4, WBP11, SIRT1, EBNA1BP2, DKC1, MRTO4, RPP21, PIH1D2, CCDC86, RPL26, RPP25, RPL29, DDX27, HEATR1, NOLC1, DDX21, RPS27L, NOC4L, RRP7A, EMG1, EXOSC5, EXOSC4, YBEY, EXOSC9, PES1, BMS1, DHX37, R…	4969	214	16792	1.42122	0.592496	0.0233134	0.0231766
GOTERM_BP_DIRECT	GO:0000722~telomere maintenance via recombination	21	0.37155	0.000113511	RFC5, PRIM2, FEN1, RFC3, RFC4, PCNA, LIG1, RFC2, PRIM1, NSMCE2, XRCC3, POLD3, POLA1, POLA2, RAD51, RAD51C, POLD1, POLE2, POLD2, DNA2, POLE	4969	32	16792	2.2177	0.597183	0.0233134	0.0231766
GOTERM_BP_DIRECT	GO:0006521~regulation of cellular amino acid metabolic process	29	0.513093	0.000137764	PSMD12, PSMD11, PSMD14, PSMD13, ODC1, OAZ1, PSMB10, PSMA7, PSMD8, PSMB6, PSMB7, PSMB4, PSMD7, PSMB5, PSMB2, PSMB3, PSMD2, PSMD3, PSMB1, PSMD1, PSMB9, PSMA5, PSMA6, PSMA3, PSMA4, PSMC3, PSMC2, PSME4, PSME2	4969	51	16792	1.92159	0.668313	0.026973	0.0268147
GOTERM_BP_DIRECT	GO:0008285~negative regulation of cell proliferation	152	2.68931	0.000138064	RB1, SMARCB1, SIRPG, PDCD5, CIB1, FGF2, IFIT3, MTBP, CDH5, RPS6KA2, TRIM24, PIM2, SOX7, SOX4, TNS2, MEN1, MAP2K1, P3H2, TSC1, DLEC1, P3H3, CGRRF1, GTPBP4, SFRP4, AR, AZGP1, SFRP2, HGS, C18ORF54, CSNK2B, ROR2, RAF1, ATF5, PLPP1, MEG3, TSG101, NOTCH1, CUL5, CUL2, CUL1, DPT, PDS5B, GATA3, FOXO4, STK4, NDRG1, STK3, CYP27B1, SMYD2, NDN, IGFBP7, IGFBP6, S100A11, LYN, CD164, TFAP2B, SMAD1, JUN, TGFB3, T…	4969	396	16792	1.29713	0.66911	0.026973	0.0268147
GOTERM_BP_DIRECT	GO:0000086~G2/M transition of mitotic cell cycle	62	1.09696	0.00014219	CCNH, PPP2R2A, FOXM1, PCM1, TUBA1A, CHEK2, CHEK1, CEP250, NEK2, SKP2, BTRC, YWHAG, RAB8A, SKP1, HSP90AA1, CEP135, BORA, TUBB, CEP131, CSNK1D, MASTL, CDC25C, TUBG1, CKAP5, CDC25A, TUBA4A, CDC25B, DNM2, MELK, BIRC5, CEP63, MAPRE1, PPP1R12B, PAFAH1B1, DYNC1I2, ABCB1, SSNA1, CUL1, HMMR, PKMYT1, AURKA, CCNB2, CCNB1, HAUS8, HAUS7, UBC, CEP70, CEP72, PCNT, KAT14, PLK4, CEP152, PLK1, FBXL15, TUBB4B, TUBB…	4969	137	16792	1.52934	0.679868	0.0271176	0.0269585
GOTERM_BP_DIRECT	GO:0000731~DNA synthesis involved in DNA repair	22	0.389243	0.000177025	BARD1, CDKN2D, BLM, RMI2, RFC3, RMI1, TOP3A, XRCC3, WRNIP1, BRCA1, PALB2, SIRT1, RAD51AP1, POLD3, POLA1, RAD51D, RAD51, RAD51C, EXO1, POLD1, DNA2, POLE	4969	35	16792	2.12416	0.757825	0.032976	0.0327825
GOTERM_BP_DIRECT	GO:0006366~transcription from RNA polymerase II promoter	190	3.36164	0.000197934	FOXA1, TCERG1, CCNH, GTF2B, ARID4A, NR3C1, IKZF3, CARF, ELK1, ELK3, HOXA10, PTTG1, SALL2, CREB3L4, MYC, MYB, TRIM24, JUNB, PITX1, SOX4, HOXA5, TP63, ABT1, MEF2A, MEF2C, SUPT16H, LMO4, EBF1, ZBTB32, EBF2, SOX11, EBF3, MITF, RUNX3, RUNX1, OVOL2, HCFC1, SUB1, TBPL1, ATF5, HOXB5, ATF4, DLX3, CBFB, EPAS1, GATA3, FOXO4, GTF2E1, DEAF1, RAD21, HLTF, HIVEP1, NDN, HIVEP2, OTX1, NKX2-5, BTF3, TFAP2B, STAT5B…	4969	513	16792	1.25161	0.795177	0.036033	0.0358215
GOTERM_BP_DIRECT	GO:0007051~spindle organization	13	0.230007	0.000228119	RANBP1, SPAG5, TTK, KIF11, CKAP5, KNSTRN, AURKB, AURKA, ASPM, NTMT1, CEP72, AUNIP, KIZ	4969	16	16792	2.74572	0.839175	0.0406051	0.0403669
GOTERM_BP_DIRECT	GO:0033209~tumor necrosis factor-mediated signaling pathway	54	0.955414	0.000289124	CD40, FASLG, TNFRSF13C, TNF, TNFSF13B, PYCARD, PSMD8, IKBKB, PSMD7, PSMD2, PSMD3, PSMD1, TNFRSF4, TNFRSF19, TRAF2, COMMD7, PSMA5, PSMA6, PSMA3, ADAM17, PSMA4, AIM2, TRAF3, PSME4, LTA, PSME2, LTB, TNFRSF21, PSMD12, PSMD11, PSMD14, PSMD13, TNFRSF11B, PSMA7, PSMB10, PSMB6, PSMB7, PSMB4, PSMB5, PSMB2, PSMB3, UBC, PSMB1, TNFRSF14, CD70, STAT1, TNFRSF9, TNFSF13, TNFRSF10B, PSMB9, PSMC3, PSMC2, PYDC1, L…	4969	118	16792	1.54648	0.901354	0.0503453	0.0500498
GOTERM_BP_DIRECT	GO:0007059~chromosome segregation	35	0.61925	0.000314181	TOP2A, CDCA2, HJURP, BRCA1, KIF11, NR3C1, SKA2, PPP1R7, TOP1MT, NTMT1, NUF2, TLK2, RCC1, OIP5, NEK2, TOP3B, CENPW, UBE2I, SPAG5, RIOK3, NEK6, SETDB2, KNSTRN, NDC80, SRPK1, SGO1, CENPE, CENPF, INCENP, NEK10, CENPN, CEP85, TOP1, SLC25A5, SPC25	4969	68	16792	1.73937	0.919298	0.0535445	0.0532303
GOTERM_BP_DIRECT	GO:0021987~cerebral cortex development	30	0.530786	0.000401733	ARHGAP11B, LRP1, KDM1A, CEP120, KIF14, WDR62, LRP8, ATIC, CCDC85C, CDH2, BTBD3, BBS4, BBS2, NCOA1, NTRK2, SRD5A1, TSC1, TRAPPC9, GNG12, ASPM, XAB2, COL3A1, TH, LHX2, TACC3, BAX, TACC1, GART, MCPH1, PAFAH1B1	4969	56	16792	1.81037	0.959986	0.0670392	0.0666458
GOTERM_BP_DIRECT	GO:0001889~liver development	37	0.654636	0.000419096	PHF2, NOTCH1, ONECUT2, CITED2, CEBPG, PTN, PKD2, ACAT1, HMGCL, DBP, MAN2A1, HES1, ACADM, JARID2, SEC63, MPST, UPF2, XBP1, JUN, PTCD2, RHBDD3, HMGCS1, SRD5A1, CAD, ASNS, ARID5B, LSR, SOD2, IGF2R, ASS1, TGFBR3, QDPR, PKM, ALDH1A2, HNRNPD, KRAS, ADA	4969	74	16792	1.68968	0.965183	0.0685094	0.0681074
GOTERM_BP_DIRECT	GO:0010628~positive regulation of gene expression	104	1.84006	0.000434671	CSF2, PID1, PDCD5, PARK7, TNF, GJA1, CDH3, MYC, RPS6KA2, LAMP3, VPS35, LGALS9, ZNF683, MEF2C, MAP2K1, TLE1, OSR1, SOX11, ANK2, MITF, PRKAB1, HCFC1, SFRP4, AR, OLFM1, MYCN, HGS, ATF4, DNMT1, HPN, FBLN1, IQGAP3, PDCD10, SRPK2, SMAD1, WNT10A, EPHX2, CAV1, MSN, BRAF, SNF8, RGCC, AGO3, MAFG, FUBP1, PIP, ID1, LCN2, HNRNPD, RLN2, CDK1, CNTN1, CALR, FGFR4, CALCOCO1, CITED1, CITED2, BRCA1, LRRC32, CD3E, S…	4969	262	16792	1.34142	0.969269	0.0696343	0.0692257
GOTERM_BP_DIRECT	GO:0007080~mitotic metaphase plate congression	22	0.389243	0.000512643	BECN1, SEH1L, VPS4A, KIF14, CDCA8, KIF22, RAB11A, CENPE, KIF18A, CCNB1, PSRC1, KIFC1, ZW10, CHMP1A, CHMP4C, CHMP2A, RRS1, CHMP4B, KIF2C, SPDL1, PIBF1, CEP55	4969	37	16792	2.00934	0.983548	0.0805151	0.0800427
GOTERM_BP_DIRECT	GO:0036109~alpha-linolenic acid metabolic process	11	0.194621	0.000573259	ELOVL1, FADS2, ACOT8, SCP2, ELOVL5, ACOX1, ELOVL2, HSD17B4, ACAA1, ABCD1, FADS1	4969	13	16792	2.85945	0.989879	0.088304	0.0877858
GOTERM_BP_DIRECT	GO:0043524~negative regulation of neuron apoptotic process	58	1.02619	0.000597993	GPI, NRP1, BTG2, HSP90AB1, CITED1, ITSN1, KIF14, SIX1, FAIM2, PARK7, SIX4, CHL1, ALKBH1, HRAS, PRKCI, MEF2C, KDM2B, EN1, MSH2, RASA1, DNAJC5, TYRO3, UBE2V2, BIRC5, ADAM8, STAMBP, CEBPB, SET, BHLHB9, LRP1, STXBP1, NDNF, CORO1A, HSPD1, ERBB3, NTF3, HMOX1, APOE, SNCA, NTRK2, TFAP2B, JUN, TGFB3, WFS1, FZD9, VEGFB, BRAF, SOD2, POU4F1, SOD1, NR4A2, GCLC, PINK1, BCL2, BAX, KRAS, GCLM, LGMN	4969	132	16792	1.48487	0.991699	0.0903759	0.0898456
GOTERM_BP_DIRECT	GO:0031124~mRNA 3'-end processing	27	0.477707	0.000727963	CSTF3, CSTF2, SRSF1, EIF4A3, U2AF1, FIP1L1, PABPN1, PCF11, U2AF2, CLP1, MAGOH, CSTF1, DHX38, CPSF1, NCBP1, NCBP2, ALYREF, CPSF3, UPF3B, THOC3, THOC5, DDX39A, SRSF2, SRSF5, SLU7, SRSF7, SRSF9	4969	50	16792	1.82485	0.997071	0.107866	0.107233
GOTERM_BP_DIRECT	GO:0002931~response to ischemia	20	0.353857	0.000740654	EGR1, MEF2C, KCNJ11, RNLS, CAV1, NDNF, FAIM2, CIB1, EEF2, HSPD1, PER2, PANX1, PANX2, UCHL1, AIFM1, BCL2, PPIF, EIF4EBP1, HYOU1, SLC26A5	4969	33	16792	2.04809	0.997354	0.107866	0.107233
GOTERM_BP_DIRECT	GO:0090263~positive regulation of canonical Wnt signaling pathway	53	0.937721	0.000920846	DIXDC1, FGF2, PSMD8, PSMD7, PSMD2, PSMD3, PSMD1, VPS35, SOX4, WLS, CSNK1D, AXIN2, DKK2, PSMA5, SFRP4, PSMA6, ASPM, PSMA3, GPRC5B, SFRP2, PSMA4, PSME4, PSME2, ROR2, AMER1, YAP1, PSMD12, PSMD11, PSMD14, SRC, PSMD13, PSMA7, PSMB10, PSMB6, PSMB7, PSMB4, PSMB5, PSMB2, PSMB3, UBC, UBR5, PSMB1, TRPM4, CAV1, FZD9, NFKB1, SULF2, PSMB9, RNF146, COL1A1, PSMC3, PSMC2, FGF10	4969	120	16792	1.49255	0.999376	0.129792	0.129031
GOTERM_BP_DIRECT	GO:0007049~cell cycle	87	1.53928	0.000923617	LIN54, TXNL4B, SMARCB1, RIF1, TUSC2, CCDC124, GMNN, HJURP, DIXDC1, BRCA1, FOXM1, CHTF18, USP39, RCBTB1, PDCD2L, CKS1B, CDC20, STK10, CHAF1B, CHAF1A, CCND2, SENP5, RASSF4, GPER1, CDK20, TLK2, PIM1, TLK1, APPL2, TP63, TIPIN, EGFL6, PRKCE, ANXA11, HCFC1, RINT1, EID1, RBL1, POC5, TXNIP, PFDN1, ZMYND11, CCNO, MCM2, CDC123, DTYMK, LIN37, ANAPC16, UHRF2, SRC, UHRF1, GPS1, GNAI3, NOLC1, LIN9, CCNDBP1, GS…	4969	217	16792	1.35486	0.99939	0.129792	0.129031
GOTERM_BP_DIRECT	GO:0001570~vasculogenesis	29	0.513093	0.00103445	YAP1, RAMP2, CITED1, CITED2, ADM, RASIP1, ZFP36L1, TMEM100, HHEX, SOX17, SOX18, NKX2-5, JUNB, TEAD2, NTRK2, FZD4, TIPARP, HEG1, CAV1, TIE1, GLMN, PTK2, TGFBR2, VEGFA, RASA1, AGGF1, CCM2, ZFPM2, ENG	4969	56	16792	1.75002	0.999749	0.142862	0.142023
GOTERM_BP_DIRECT	GO:0042542~response to hydrogen peroxide	27	0.477707	0.00107066	SRC, HBB, HSPD1, PRDX3, LDHA, PDCD10, CASP3, HMOX1, KPNA4, BAK1, PDGFRB, JUN, DUSP1, STAT1, HBA2, GLRX2, EEF2, SOD2, SIRT1, SOD1, COL1A1, FOSL1, STK26, CAT, BCL2, TXNIP, ADA	4969	51	16792	1.78907	0.999812	0.145356	0.144503
GOTERM_BP_DIRECT	GO:0001666~response to hypoxia	71	1.25619	0.00115823	CDKN1B, CITED2, ADM, ABAT, PLAT, PLOD2, PLOD1, SLC6A4, EDNRA, PLAU, CASP3, LONP1, DNMT3B, CD38, CA9, POSTN, ADSL, MMP2, CYBA, ACTN4, ATP1B1, TGFBR2, TGFBR3, F7, ADAM17, PKM, CLDN3, DDIT4, KCNMA1, CAT, LTA, ANG, RAF1, ENG, BECN1, RAMP2, AHCY, EPAS1, ITPR1, ITPR2, ASCL2, CYGB, HSPD1, HSP90B1, PDLIM1, CST3, LDHA, MUC1, PENK, HMOX1, EGLN1, EGR1, ARNT2, CREBBP, EGLN2, TGFB3, CAV1, VEGFB, MTHFR, WTIP, …	4969	172	16792	1.39497	0.999907	0.152262	0.151368
GOTERM_BP_DIRECT	GO:0006367~transcription initiation from RNA polymerase II promoter	64	1.13234	0.00115955	THRA, CCNH, GTF2B, RORC, RORA, RORB, MED16, NR3C1, MED15, NR3C2, TAF7L, MED14, TRIM28, MED10, HNF4A, TEAD2, TEAD4, NCOA6, MED8, MED27, MED26, NRBP1, MED6, MED7, AR, NR5A2, PPARG, PGR, PPARD, YAP1, NOTCH1, MAZ, NR2C2, GTF2E1, RXRA, MED30, POLR2A, POLR2D, POLR2F, E2F2, POLR2G, E2F3, POLR2H, POLR2J, NR2C2AP, POLR2L, ESRRA, CREBBP, TAF13, NR2F1, ESRRG, GTF2H4, ESR1, GTF2H5, NR2F6, NR4A2, CDK8, ERCC3,…	4969	152	16792	1.42289	0.999908	0.152262	0.151368
GOTERM_BP_DIRECT	GO:1901796~regulation of signal transduction by p53 class mediator	54	0.955414	0.00121102	DYRK2, SETD9, EHMT2, BRCA1, EXO1, CHEK2, CHEK1, TRIM24, KMT5A, TOPBP1, TP63, ZNF385A, RFC5, RMI2, SUPT16H, RFC3, RFC4, CSNK2A1, RMI1, RFC2, CSNK2A2, TOP3A, PRKAB1, CSNK2B, MAPKAPK5, DNA2, RHNO1, L3MBTL1, BLM, HDAC2, AURKB, AURKA, NUAK1, UBC, TP53INP1, SMYD2, TP53BP2, MTA2, BRD7, BARD1, TAF13, SSRP1, POU4F1, TPX2, CDK5, CDK2, TAF4B, RAD17, TAF6, TAF5, TAF4, TAF2, CDK5R1, RAD9A	4969	124	16792	1.47165	0.999939	0.154601	0.153693
GOTERM_BP_DIRECT	GO:0006626~protein targeting to mitochondrion	20	0.353857	0.00121596	TOMM70, TIMM8B, FIS1, TOMM40, MTX1, MTX3, PDE2A, TOMM34, TIMM23, TIMM44, TIMM22, TIMM10, TOMM22, TIMM17A, TOMM7, TSPO, TIMM17B, MGARP, BID, TOMM5	4969	34	16792	1.98785	0.999941	0.154601	0.153693
GOTERM_BP_DIRECT	GO:0001782~B cell homeostasis	13	0.230007	0.00124086	LYN, MEF2C, TNFRSF13C, RC3H2, TNFSF13B, BCL2L11, BCL2, BAX, NCKAP1L, BAK1, PKN1, SOS1, GAPT	4969	18	16792	2.44064	0.999952	0.155301	0.15439
GOTERM_BP_DIRECT	GO:0032496~response to lipopolysaccharide	68	1.20311	0.00129652	CXCL9, CD40, CITED1, HMGB2, ADM, FASLG, COMT, CXCL13, LOXL1, IL18BP, CASP9, CASP3, CCR7, CTSG, LBP, LGALS9, JUNB, TNFRSF4, TIMP4, ABCC8, FOS, DCN, FOXP1, BCR, ADAM17, LTA, S100A8, TNFRSF21, S100A7, IDO1, IFNAR1, HDAC2, NOTCH1, MGST2, TNFRSF11B, LIAS, ADH5, HSPD1, PRDX3, ABR, CYP27B1, SRR, IRAK1, NOCT, PENK, TNFRSF14, TAC1, ELANE, HNRNPA0, SNCA, PCK2, AKIRIN2, JUN, GCH1, TNFRSF9, TNFRSF10B, GNG12,…	4969	164	16792	1.40119	0.999969	0.159771	0.158833
GOTERM_BP_DIRECT	GO:0002223~stimulatory C-type lectin receptor signaling pathway	47	0.831564	0.00134206	PSMD12, PSMD11, PSMD14, PSMD13, SRC, UBE2D2, CUL1, PSMB10, PSMA7, PSMD8, IKBKB, PSMB6, PSMB7, NRAS, PSMB4, PSMD7, RPS6KA5, PSMB5, PSMB2, PSMB3, PSMD2, PSMD3, UBC, PSMB1, PSMD1, BTRC, HRAS, MAP3K7, SKP1, LYN, CREBBP, SYK, CARD9, NFKB1, PSMB9, PSMA5, PSMA6, PSMA3, PSMA4, PSMC3, PSMC2, PSME4, PSME2, KRAS, UBE2V1, RAF1, CARD11	4969	105	16792	1.51266	0.999979	0.162878	0.161922
GOTERM_BP_DIRECT	GO:0050821~protein stabilization	58	1.02619	0.00142191	SWSAP1, HSP90AB1, PTEN, PARK7, IFI30, SOX17, TMEM88, CHEK2, ZNF207, PIM2, GTSE1, SOX4, CCT3, CCT2, HSP90AA1, COG7, FKBPL, FBXW7, TESC, ANK2, TSC1, ATP1B3, ATP1B1, GTPBP4, HCFC1, DNLZ, PLPP3, IFT46, PFN1, GAPDH, PFN2, USP13, STX12, STXBP1, PIK3R1, STK4, NAPG, HSPD1, STK3, PDCD10, FLNA, DVL3, CCT7, TSPAN1, CCT5, GPIHBP1, CRTAP, UBE2B, CDKN2A, WFS1, IGF1, CCT6A, PINK1, PER3, DNAJA3, GNAQ, NAA15, CALR	4969	136	16792	1.44119	0.999989	0.169993	0.168995
GOTERM_BP_DIRECT	GO:0006409~tRNA export from nucleus	19	0.336164	0.00147212	NDC1, NUP205, NUP107, SEH1L, NUP188, NUP210, NUP155, NUP153, NUP160, NUP93, POM121C, XPOT, NUP85, NUP50, NUP62, NUP88, NUP98, RAE1, NUP37	4969	32	16792	2.00649	0.999992	0.173407	0.172389
GOTERM_BP_DIRECT	GO:0000070~mitotic sister chromatid segregation	16	0.283086	0.00150973	SPAG5, PLK1, CENPA, SMC4, KNSTRN, NDC80, NSL1, ZWINT, KIF18B, ESPL1, KIFC1, ZW10, NUSAP1, ZNF207, NEK2, MAD2L1	4969	25	16792	2.16279	0.999994	0.17526	0.174232
GOTERM_BP_DIRECT	GO:0060071~Wnt signaling pathway, planar cell polarity pathway	42	0.7431	0.00160784	PSMD12, PSMD11, PSMD14, PSMD13, PRICKLE2, CELSR2, PSMB10, CELSR3, PSMA7, PSMD8, PSMB6, PSMB7, PSMB4, PSMD7, WNT11, PSMB5, PSMB2, PSMB3, PSMD2, PSMD3, UBC, PSMB1, AP2S1, DVL3, PSMD1, GPC4, AP2M1, FZD1, FZD4, WNT5A, PSMB9, VANGL1, PSMA5, PSMA6, PSMA3, PSMA4, PSMC3, PSMC2, PSME4, PSME2, ROR2, PFN1	4969	92	16792	1.54275	0.999997	0.183983	0.182904
GOTERM_BP_DIRECT	GO:0000209~protein polyubiquitination	74	1.30927	0.00207826	UBE3C, RNF14, UBE2D2, RNF19B, FBXO22, PSMD8, NPEPPS, PSMD7, RNF114, RUSC1, PSMD2, PSMD3, FBXO4, ARIH2, TRIM69, FBXO3, PSMD1, FBXO6, ARIH1, SKP2, BTRC, SKP1, MYLIP, FBXW7, RC3H2, KLHL42, PSMA5, PSMA6, PSMA3, RNF125, PSMA4, CDC34, PSME4, UBE2V2, PSME2, UBE2V1, DTL, PSMD12, PSMD11, CBFB, PSMD14, PSMD13, CUL1, NEDD4L, UBR2, PSMA7, PSMB10, PSMB6, PSMB7, PSMB4, PSMB5, RNF213, HECTD2, PSMB2, PSMB3, UBC,…	4969	184	16792	1.35909	1	0.234463	0.233087
GOTERM_BP_DIRECT	GO:0010827~regulation of glucose transport	19	0.336164	0.00234987	NDC1, NUP205, NUP107, SEH1L, NUP188, NUP210, NUP155, NUP153, NUP160, NUP93, POM121C, NUP85, NUP50, NUP62, TRIB3, NUP88, NUP98, RAE1, NUP37	4969	33	16792	1.94569	1	0.261424	0.25989
GOTERM_BP_DIRECT	GO:0048538~thymus development	23	0.406936	0.00239575	TBX1, MAP2K1, CARMIL2, RIPK3, CITED2, PRKDC, LMO4, SIX1, BRAF, GATA3, CRKL, SOD1, CCNB2, BCL2L11, SIX4, BCL2, MAPK1, HES1, RAF1, JARID2, MAD1L1, FGF10, MAPK3	4969	43	16792	1.80756	1	0.262876	0.261334
GOTERM_BP_DIRECT	GO:0009083~branched-chain amino acid catabolic process	13	0.230007	0.00246327	BCKDHA, ACAD8, HIBADH, BCKDHB, MCCC1, ACADSB, HSD17B10, ACAT1, ALDH6A1, AUH, IVD, BCAT1, BCAT2	4969	19	16792	2.31219	1	0.266632	0.265068
GOTERM_BP_DIRECT	GO:0050852~T cell receptor signaling pathway	61	1.07926	0.00277506	ITK, UBE2D2, PTEN, CD3G, CD3E, CD3D, PSMD8, IKBKB, PSMD7, PSMD2, PSMD3, PSMD1, BTRC, HRAS, MAP3K7, NCK1, SKP1, RIPK2, LIME1, PSMA5, PSMA6, ZAP70, PSMA3, PSMA4, IFNG, LCK, PSME4, PSME2, PRKCQ, UBE2V1, SKAP1, CARD11, TNFRSF21, PSMD12, STOML2, PSMD11, PSMD14, PSMD13, CUL1, PIK3R1, GATA3, PSMA7, PSMB10, PSMB6, PSMB7, PSMB4, PSMB5, PSMB2, PSMB3, UBC, PSMB1, MAPK1, CSK, PLCG1, CARMIL2, NFKB1, PSMB9, CD…	4969	148	16792	1.39284	1	0.296377	0.294638
GOTERM_BP_DIRECT	GO:0003151~outflow tract morphogenesis	24	0.424628	0.00282985	FZD1, TBX1, JUN, MEF2C, BMPR2, SEMA3C, NPY5R, CITED2, SIX1, SOX11, TBX3, TGFBR2, TBX2, VEGFA, TGFBR3, BMP4, HEYL, CLDN5, SFRP2, WNT11, SOX17, SOX18, HES1, NKX2-5	4969	46	16792	1.76314	1	0.298251	0.296501
GOTERM_BP_DIRECT	GO:0009409~response to cold	20	0.353857	0.00296028	SLC27A1, HSP90AA1, THRA, ACOT11, CIRBP, GMPR, LPL, ADM, HSPA2, FOS, ADRB2, SOD2, HSPD1, CXCL10, PCSK1N, VGF, ZNF516, PPARG, ACADM, LRP11	4969	36	16792	1.87742	1	0.307185	0.305383
GOTERM_BP_DIRECT	GO:0006915~apoptotic process	199	3.52088	0.00299132	RB1, ARL6IP1, PRF1, NUDT2, GJA1, DPF1, TNFSF10, TP63, MEF2A, UNC13B, MEF2C, SAP30BP, UNC5A, CSNK2A1, DAPK1, MAP1S, PRKCE, CSNK2A2, NISCH, RRAGA, SFRP2, RRAGC, DDIT3, VDAC1, PRKD1, PDE1B, CDCA7, PRDX3, PRDX5, RAD21, DDIAS, SIAH2, EAF2, CIDEA, CIDEC, GADD45G, AIMP2, TPX2, HRK, CSRNP1, CSRNP2, CSRNP3, CITED1, SRA1, BRCA1, SH3RF1, CASP14, MYDGF, HINT2, MECOM, AIFM1, TCTN3, TSPO, C19ORF12, CTSC, RIPK2…	4969	567	16792	1.18605	1	0.307185	0.305383
GOTERM_BP_DIRECT	GO:0043065~positive regulation of apoptotic process	112	1.9816	0.00319683	MTCH1, ITSN1, PDCD5, TNF, IFIT2, PYCARD, RPS6KA2, TNFSF10, ARL6IP5, SOX4, HOXA5, PHLDA3, TGM2, UNC13B, PDGFRB, BNIP3L, SCRIB, CLIP3, SFRP4, SFRP2, MELK, TXNIP, ATF4, NSMAF, NOTCH1, DIABLO, PRKDC, DCUN1D3, LPAR1, STK4, STK3, SLC9A1, ABR, LDHA, APH1B, BCL2L11, ZMAT3, UBD, UBC, HMOX1, ECT2, IP6K2, BARD1, MOAP1, CDK19, TGFB3, ZBTB16, FZD9, BMP7, IGF2R, GADD45G, FOSL1, BMP4, BCL6, CDK4, ID3, HRK, TOP2…	4969	300	16792	1.26162	1	0.324134	0.322232
GOTERM_BP_DIRECT	GO:0036297~interstrand cross-link repair	25	0.442321	0.00327375	MUS81, DCLRE1A, RNF8, FAAP24, RAD51AP1, EME1, UBC, USP1, EXO5, FANCI, POLN, CENPX, XRCC3, ZBTB32, FANCC, FANCB, FANCE, FANCG, CORT, RAD51D, RAD51, FANCD2, ERCC1, UBE2T, SLX1A	4969	49	16792	1.72416	1	0.32536	0.323451
GOTERM_BP_DIRECT	GO:0006357~regulation of transcription from RNA polymerase II promoter	158	2.79547	0.00334217	RB1, SMARCB1, KDM1A, ARID4A, GABPB1, IKZF3, SPIB, SOX15, ZSCAN32, RUVBL1, ZNF446, SOX7, JUNB, MNX1, ABT1, IFNAR2, ZNF18, SMARCC2, MED8, ARID5A, MITF, RFX1, FOXP4, RUNX3, MED6, FOXP1, MED7, WDR77, MYCN, SUB1, ATF5, ANKRA2, ATF4, ZNF671, URI1, ENY2, TSHZ3, CBFB, GLO1, TSHZ1, TSHZ2, BHLHE22, NPAS1, NPAS3, MED30, DEAF1, RAD21, HLTF, NKX2-5, ZBED4, STAT5A, STAT5B, TFAP2C, NFATC3, SNF8, NR2F2, MAFA, SU…	4969	441	16792	1.21074	1	0.32536	0.323451
GOTERM_BP_DIRECT	GO:0001701~in utero embryonic development	74	1.30927	0.00338547	GPI, KDM1A, CHD7, PLOD3, BRK1, ADAR, YBX1, GLI3, GLI2, TMEM100, GJA1, HHEX, EDNRA, SOX18, SIN3A, MYC, ALKBH1, TCTN1, FLVCR1, ATP7A, TAPT1, GABPA, ACVR1, DUSP3, PRMT1, HEG1, TPM1, EPN1, TGFBR2, FOXP1, AR, MSH2, SYF2, ZFPM2, EIF4E2, NOTCH1, ANKRD11, SRSF1, GATA3, ACVR1B, ADD1, CCNB2, EPB41L5, C5, FUT8, MUC1, CCNB1, BCL2L11, C6, RXRA, MAN2A1, RDH10, GNA12, PLCG1, MYH10, BTF3, ARNT2, STIL, UBE2B, TGF…	4969	187	16792	1.33728	1	0.32536	0.323451
GOTERM_BP_DIRECT	GO:0006879~cellular iron ion homeostasis	23	0.406936	0.00346756	EGLN1, ABCB6, SCARA5, TFRC, TMPRSS6, IREB2, SLC40A1, CYBRD1, TTC7A, CP, NUBP1, SOD1, HPX, SLC22A17, MYC, FLVCR1, LCN2, HMOX1, ACO1, HAMP, ISCU, FTL, ABCG2	4969	44	16792	1.76648	1	0.32536	0.323451
GOTERM_BP_DIRECT	GO:0034644~cellular response to UV	23	0.406936	0.00346756	USP47, CREBBP, TMEM161A, PCNA, KDM1A, FBXW7, PTN, TRIAP1, PIK3R1, CDC25A, AURKB, AQP1, CASP9, MYC, RUVBL2, POLD1, TP53INP1, PBK, BAX, BAK1, TP63, RHNO1, ATF4	4969	44	16792	1.76648	1	0.32536	0.323451
GOTERM_BP_DIRECT	GO:0060412~ventricular septum morphogenesis	17	0.300778	0.00349325	EGLN1, ACVR1, RBM15, BMPR2, NOTCH1, CITED2, SOX11, TBX3, TGFBR2, TGFBR3, HEYL, WNT11, HEY1, HES1, NKX2-5, ZFPM2, SOX4	4969	29	16792	1.981	1	0.32536	0.323451
GOTERM_BP_DIRECT	GO:0043928~exonucleolytic nuclear-transcribed mRNA catabolic process involved in deadenylation-dependent decay	17	0.300778	0.00349325	DIS3, LSM1, LSM5, LSM4, PATL1, LSM2, EDC4, LSM7, EXOSC5, EXOSC4, EXOSC9, EXOSC3, CNOT8, DCPS, EXOSC2, EXOSC1, DCP1B	4969	29	16792	1.981	1	0.32536	0.323451
GOTERM_BP_DIRECT	GO:0006974~cellular response to DNA damage stimulus	81	1.43312	0.00357195	TOP2A, BTG2, DYRK2, MCM7, MCM8, PHF1, CIB1, MCM10, BRCA1, ALKBH7, AATF, ALKBH8, CASP9, IMMP2L, HELB, MYC, CHEK2, CHCHD6, CHEK1, TLK2, MACROD1, TLK1, CTLA4, TOPBP1, TP63, ZNF385A, MEN1, USP47, TIPIN, ARMT1, NCOA6, FBXW7, ZBTB38, DDX11, UBE2E2, MASTL, BAZ1B, SIRT1, WDR76, DDX39A, DDIT3, PSME4, IRF7, TIMELESS, SPATA18, DTL, OTUB1, YAP1, PPP1R15A, BRSK1, BLM, VCP, USP10, RNF8, RPS27L, ZBTB4, CDKN2AIP…	4969	208	16792	1.316	1	0.327533	0.325611
GOTERM_BP_DIRECT	GO:0000079~regulation of cyclin-dependent protein serine/threonine kinase activity	21	0.37155	0.00359836	CDKN2D, DIRAS3, BLM, CDKN1B, CDKN2C, PTEN, CDC6, PKMYT1, CDC25C, CDC25A, GTPBP4, CCNA2, CCNE2, SERTAD1, CCNG1, CDK5RAP1, CCNYL1, SFN, CDK5RAP3, CDKN3, CDK5R1	4969	39	16792	1.81965	1	0.327533	0.325611
GOTERM_BP_DIRECT	GO:0070207~protein homotrimerization	14	0.2477	0.00376301	MLKL, SCARA5, TNFRSF9, SIGMAR1, BRK1, PKD2L1, TRAF2, MIF, DISP1, SKI, HSF1, HSF4, LCN2, ATXN10	4969	22	16792	2.1505	1	0.337121	0.335143
GOTERM_BP_DIRECT	GO:0055114~oxidation-reduction process	206	3.64473	0.00378787	DMGDH, GLDC, JMJD1C, IFI30, ALKBH7, ALKBH6, ALKBH8, CYP4Z1, NSDHL, TDO2, ALKBH1, OGFOD1, GSTK1, DHDH, P3H2, P3H3, JMJD6, CH25H, POR, MTHFD1, CYP2U1, MTHFD2, FAR2, DUS3L, IDO1, MAOA, FAXDC2, TXN, CYP27B1, LDHB, CYB5R1, PRDX5, LDHA, CYP4X1, PRDX4, RDH10, PRDX1, LDHD, RDH16, ADHFE1, PYCR1, MTHFR, CP, DHFR, CYP26A1, SQLE, GLUD1, MSRA, ALDH6A1, TH, NDUFAF5, DUS1L, PAM, DHRS12, PHF2, HIBADH, GDI2, CHM,…	4969	592	16792	1.17592	1	0.337121	0.335143
GOTERM_BP_DIRECT	GO:0042127~regulation of cell proliferation	73	1.29158	0.00392335	ITK, CXCL9, CD40, CDKN1B, BMPR2, TFRC, CIB1, BRCA1, FOXM1, PKD2, CXCL13, GRPR, TNF, HHEX, PLAU, CHEK1, JUNB, TNFRSF4, JAK1, KCNH1, SIRT1, TGFBR2, PIAS1, ACE2, NR5A2, LCK, BTK, AGTR1, TIMELESS, TXNIP, SGK3, TNFRSF21, ENG, DNMT1, SRC, CDCA7, HOXD13, TNFRSF11B, PDS5B, NDRG1, PURA, NUAK1, ERBB3, CSK, TNFRSF14, STAT6, E2F4, BID, EPS15, S100A11, ESRRA, JUN, TFAP2C, JAG1, YES1, TGFB3, TNK1, TNFRSF10B, B…	4969	185	16792	1.33347	1	0.345341	0.343315
GOTERM_BP_DIRECT	GO:0000226~microtubule cytoskeleton organization	33	0.583864	0.00403037	DOCK7, TTL, GABARAP, TUBA1B, MAP2, MAP6, PCNT, NEFH, BBS4, MARK2, CLASP2, GAS2L3, DST, MAP1S, TUBG1, EML1, MID1, PTK2, EML4, CCDC8, MAP7D2, MAP1A, TBCE, CDK1, TACC3, BIRC5, MAP6D1, TACC1, MAPT, GAPDH, PHLDB2, ZPR1, PAFAH1B1	4969	71	16792	1.57068	1	0.350905	0.348846
GOTERM_BP_DIRECT	GO:0009615~response to virus	47	0.831564	0.00409048	URI1, SRC, ODC1, DDX21, ADAR, GATA3, ENO1, ZC3HAV1, IFIT1, TNF, IFIT3, IFIT2, OASL, IFIH1, IKBKB, CCL8, CCL5, DHX36, CCL4, STMN1, HYAL3, BANF1, PIM2, CCT5, IFNAR2, MEF2C, RSAD2, MX2, MX1, HMGA1, IFI44, EIF2AK2, DCLK1, ISG20, ACTA2, FOSL1, CXCL12, IFNG, OAS1, OAS2, IRF7, LCN2, TLR8, CCDC130, MYD88, TPT1, IFNAR1	4969	110	16792	1.4439	1	0.352309	0.350242
GOTERM_BP_DIRECT	GO:0006405~RNA export from nucleus	27	0.477707	0.00417119	NXT1, NUP188, SRSF1, EIF4A3, U2AF1, NXF1, POM121C, U2AF2, MAGOH, NUP62, DHX38, HNRNPA1, RANBP1, NCBP1, NUP155, NCBP2, ALYREF, UPF3B, THOC3, THOC5, DDX39A, SRSF2, NUP98, SRSF5, SLU7, SRSF7, SRSF9	4969	55	16792	1.65895	1	0.355415	0.35333
GOTERM_BP_DIRECT	GO:0051092~positive regulation of NF-kappaB transcription factor activity	55	0.973107	0.00421529	CD40, ITGB2, CIB1, IL1RAP, TNF, RPS6KA4, PYCARD, TRIM8, IKBKB, RPS6KA5, CAPN3, LGALS9, MAP3K7, PRKCI, RIPK3, RIPK2, SPHK1, WNT5A, RIPK4, TRAF2, TRAF1, MID2, PSMA6, AR, AIM2, TRAF5, CAT, BTK, TLR9, TRIM13, PRKCQ, ADAM8, UBE2V1, PRKD1, S100A9, S100A8, TLR3, CARD11, LTF, TRIM52, NOD2, MTDH, PRDX3, IRAK1, UBC, NLRP3, EIF2AK2, TRAPPC9, NFKB1, NFKB2, KRAS, TRIM37, RHEBL1, MYD88, NFKBIB	4969	133	16792	1.39748	1	0.355415	0.35333
GOTERM_BP_DIRECT	GO:0034614~cellular response to reactive oxygen species	13	0.230007	0.00450867	SRC, TPM1, AKR1C3, UCP1, FOS, PKD2, PRDX3, PRDX5, NME8, BTK, ROMO1, PDK2, PPARGC1B	4969	20	16792	2.19658	1	0.376192	0.373985
GOTERM_BP_DIRECT	GO:0010629~negative regulation of gene expression	56	0.9908	0.00515947	RB1, UCN, CITED2, PARK7, CD3E, TNF, C1QTNF3, GJA1, GPER1, CPNE1, ANXA7, DIP2A, LGALS9, CD34, HRAS, BBS4, MAP2K1, MEF2C, MAP2K2, SERPINF1, SLC35C2, ZNF281, SOX11, MIF, SIRT1, POU5F1, NME1, OLFM1, MYCN, SFRP2, RBL1, IFNG, PTRH2, PGR, CD46, ENG, ACVR1B, ACACB, IQGAP3, CCNB1, PDCD10, STC2, NOCT, TP53INP1, SLIT3, BAK1, LDLR, STOX1, BBS2, CCR1, TIPARP, VEGFB, KLF4, ESR1, NFKB1, PINK1	4969	137	16792	1.38134	1	0.426055	0.423555
GOTERM_BP_DIRECT	GO:0006520~cellular amino acid metabolic process	21	0.37155	0.00521929	GGT5, DDC, SDS, ACY1, GLS2, TAT, HDC, CAD, MTHFR, SLC7A2, QDPR, SLC7A4, SLC7A5, GLUD1, SLC7A6, SRR, SLC7A7, SLC7A8, KYAT3, SCLY, ATF4	4969	40	16792	1.77416	1	0.426597	0.424094
GOTERM_BP_DIRECT	GO:0006103~2-oxoglutarate metabolic process	12	0.212314	0.00537738	STAT5A, STAT5B, GOT1, MRPS36, AADAT, ADHFE1, TAT, GPT2, IDH2, OGDH, KYAT3, D2HGDH	4969	18	16792	2.2529	1	0.426674	0.424171
GOTERM_BP_DIRECT	GO:0071902~positive regulation of protein serine/threonine kinase activity	19	0.336164	0.00542323	MAP2K1, SLC27A1, MAP2K2, RALB, HSP90AB1, SRC, IGF2, CIB1, STK4, STK3, PPP2CA, RPTOR, PDCD10, SPRY2, CAMK1, EZH2, CDK5R1, LTF, SNCA	4969	35	16792	1.83451	1	0.426674	0.424171
GOTERM_BP_DIRECT	GO:0001822~kidney development	38	0.672328	0.00543901	CDKN1C, TMED10, ARL3, ODC1, LRP4, SIX1, GATA3, PCSK5, FSTL3, GLI2, PKHD1, RIDA, BCL2L11, PPAT, NPHP3, TNS2, MPST, TFAP2B, PTCD2, WFS1, TIPARP, SERPINF1, ARID5B, SOX11, TSC1, DCN, ASS1, SULF2, JMJD6, VEGFA, BMP4, IFT20, CENPF, LHX1, ALDH1A2, ITGA8, AGTR1, BAX	4969	86	16792	1.4932	1	0.426674	0.424171
GOTERM_BP_DIRECT	GO:0007131~reciprocal meiotic recombination	17	0.300778	0.0054502	KLHDC3, CNTD1, C11ORF80, XRCC3, MND1, REC8, CCNB1IP1, RAD54B, MSH6, RNF212, RAD51D, RAD51, RAD51C, MSH2, MSH3, RAD21, TRIP13	4969	30	16792	1.91497	1	0.426674	0.424171
GOTERM_BP_DIRECT	GO:0030512~negative regulation of transforming growth factor beta receptor signaling pathway	30	0.530786	0.00548657	ONECUT2, FAM89B, RASL11B, TGFB1I1, HTRA3, HTRA4, HTRA1, LDLRAD4, MTMR4, PBLD, SNX25, UBC, ADAMTSL2, PMEPA1, XBP1, HSPA5, TGFB3, CAV2, CAV1, CIDEA, SIRT1, VASN, TGFBR2, DNM2, TGFBR3, SKI, ADAM17, STRAP, DAND5, ENG	4969	64	16792	1.58407	1	0.426674	0.424171
GOTERM_BP_DIRECT	GO:0075733~intracellular transport of virus	25	0.442321	0.00622071	NUP205, SEH1L, TSG101, NUP107, NUP188, NUP160, XPO1, POM121C, NUP85, NUP62, UBC, KPNA4, NUP88, KPNA2, RAE1, KPNA1, NDC1, NUP155, NUP210, NUP153, VPS37B, NUP93, NUP50, NUP98, NUP37	4969	51	16792	1.65655	1	0.479114	0.476303
GOTERM_BP_DIRECT	GO:0000083~regulation of transcription involved in G1/S transition of mitotic cell cycle	14	0.2477	0.00632976	RB1, KLF11, RRM2, PCNA, CDC6, TYMS, DHFR, POLA1, CDC45, ORC1, CCNE1, CDK1, E2F4, FBXO5	4969	23	16792	2.057	1	0.48287	0.480037
GOTERM_BP_DIRECT	GO:0071526~semaphorin-plexin signaling pathway	18	0.318471	0.00666793	SEMA5A, FARP2, NRP1, SEMA7A, SEMA6A, SEMA4D, SEMA3C, SEMA6D, SEMA3B, SEMA4C, SEMA3G, SEMA3E, ARHGDIA, PLXNA2, PLXNB3, FLNA, PLXNB1, PLXNA3	4969	33	16792	1.84328	1	0.500858	0.497919
GOTERM_BP_DIRECT	GO:0006378~mRNA polyadenylation	16	0.283086	0.00669061	CPSF4, APP, CPSF6, AHCYL1, CPSF1, CSTF3, ZC3H3, CPSF3, CSTF2, SSU72, PCF11, CLP1, LEO1, CSTF1, PABPC1, MTPAP	4969	28	16792	1.93106	1	0.500858	0.497919
GOTERM_BP_DIRECT	GO:0043101~purine-containing compound salvage	10	0.176929	0.00747503	ADAL, MTAP, PNP, GMPR2, ADK, GMPR, HPRT1, DCK, ADA, APRT	4969	14	16792	2.41382	1	0.554398	0.551145
GOTERM_BP_DIRECT	GO:0006412~translation	94	1.66313	0.00797992	MRPS17, SLC25A1, MRPS15, RPL3, MRPS14, RPL34, RPL10L, MRPS12, MRPL36, MRPL37, RPL8, RPL9, MRPL35, YARS2, RPL6, MRPL4, RPS4X, EFTUD2, MRPL42, MRPL3, MRPL2, RPS19, RPL36AL, SLC25A43, SLC25A42, MRPL9, RPS10, RPS13, RPS9, PABPC4, RPL22, MRPS23, MRPS18A, MRPS2, SOX11, MRPS7, MRPS5, MRPS9, MRPL51, SLC25A19, NHP2, SLC25A10, RPL26, RPL29, SLC25A12, SLC25A5, SLC25A13, MRPS36, MRPL18, MRPS33, MRPL16, UCP1,…	4969	253	16792	1.25557	1	0.586414	0.582973
GOTERM_BP_DIRECT	GO:0046487~glyoxylate metabolic process	15	0.265393	0.00822078	BCKDHA, LIPT1, PDHX, PDHA1, GLDC, BCKDHB, AMT, PDHB, HOGA1, LIAS, DDO, GNMT, DHTKD1, GCSH, OGDH	4969	26	16792	1.94963	1	0.598623	0.59511
GOTERM_BP_DIRECT	GO:0051310~metaphase plate congression	9	0.159236	0.00863689	CENPE, CENPF, TRAPPC12, KIF2C, KIF22, FAM83D, CENPQ, NDC80, GEM	4969	12	16792	2.53451	1	0.623256	0.619599
GOTERM_BP_DIRECT	GO:0060548~negative regulation of cell death	26	0.460014	0.00909615	BECN1, HTR2B, PARK7, FGF2, NPAS2, CST3, WNT11, MYC, AGR2, AGR3, SRGAP2, PDE8A, SOX4, TEAD2, NCK1, BNIP3L, SOX11, CACYBP, BMP7, DUS2, BMP4, NPC1, CHMP2A, CHMP4B, PRKD1, ZFPM2	4969	55	16792	1.59751	1	0.650537	0.64672
GOTERM_BP_DIRECT	GO:0031100~organ regeneration	23	0.406936	0.00929667	PRPS2, UPF2, NOTCH1, FLT3, CAD, ADM, MKI67, IGF2R, TGFBR2, TGFBR3, CCNA2, F7, PKM, CXCL12, ATIC, CDK4, PPAT, CDK1, PPARG, LCP1, BAK1, LPIN1, GAS6	4969	47	16792	1.65373	1	0.658994	0.655128
GOTERM_BP_DIRECT	GO:0051276~chromosome organization	12	0.212314	0.00938428	SFPQ, CENPW, PTTG1, MYC, NCAPH2, RAD54L, CDCA8, RLF, SMC4, ITPA, GEM, PTTG3P	4969	19	16792	2.13433	1	0.659369	0.6555
GOTERM_BP_DIRECT	GO:1903206~negative regulation of hydrogen peroxide-induced cell death	8	0.141543	0.00972988	NUP93, GPR37, PSAP, PYCR1, GPR37L1, PARK7, TXN, PDE8A	4969	10	16792	2.70348	1	0.666776	0.662863
GOTERM_BP_DIRECT	GO:0006268~DNA unwinding involved in DNA replication	8	0.141543	0.00972988	TOP2A, PURA, RAD51, MCM7, HMGA1, MCM4, MCM6, MCM2	4969	10	16792	2.70348	1	0.666776	0.662863
GOTERM_BP_DIRECT	GO:0043154~negative regulation of cysteine-type endopeptidase activity involved in apoptotic process	31	0.548478	0.00973942	GPI, ARL6IP1, SRC, LEF1, IFI6, ARRB1, TRIAP1, SH3RF1, AQP1, PRDX3, PRDX5, LAMP3, SFN, FNIP1, MAP2K5, SNCA, CDKN2D, IGBP1, TFAP2B, USP47, CSNK2A1, SIAH2, KLF4, VEGFA, POR, SFRP2, DNAJA3, BIRC5, AVP, RAF1, GAS6	4969	69	16792	1.51826	1	0.666776	0.662863
GOTERM_BP_DIRECT	GO:0001957~intramembranous ossification	6	0.106157	0.010235	COL1A1, MN1, CTSK, MMP2, FGF18, AXIN2	4969	6	16792	3.37935	1	0.676331	0.672363
GOTERM_BP_DIRECT	GO:0072719~cellular response to cisplatin	6	0.106157	0.010235	RAD51, SLC31A1, DDX11, TIMELESS, HMOX1, ADIRF	4969	6	16792	3.37935	1	0.676331	0.672363
GOTERM_BP_DIRECT	GO:0006986~response to unfolded protein	21	0.37155	0.0102516	HSP90AA1, HSP90AB1, HSPA1L, HSPA4L, HSPB7, DERL1, HSPB2, HSPA2, TOR1B, THBS4, HSPD1, MANF, DNAJA1, HSPH1, JKAMP, DDIT3, CREBRF, SERPINH1, TMBIM6, FBXO6, CHAC1	4969	42	16792	1.68968	1	0.676331	0.672363
GOTERM_BP_DIRECT	GO:0010976~positive regulation of neuron projection development	38	0.672328	0.0104266	CAMK2B, NDRG4, TENM3, KDM1A, STMN2, KATNB1, NDNF, PTN, RELN, DPYSL3, NPTN, MARK2, SCN1B, NCK1, LYN, RANBP1, NTRK2, PRKCI, TMEM30A, CAMK1D, BCL11A, KIDINS220, ITGA3, SERPINF1, DDX56, WNT5A, PPP2R5B, NME1, GPRC5B, FES, PTK7, FEZ1, UBE2V2, PLXNB3, CNTN1, PRKD1, CAMK1, EPHA3	4969	89	16792	1.44287	1	0.676331	0.672363
GOTERM_BP_DIRECT	GO:0050773~regulation of dendrite development	7	0.12385	0.01047	CDC20, PREX1, CAMK1D, BCL11A, RTN4IP1, RAB17, DBN1	4969	8	16792	2.95693	1	0.676331	0.672363
GOTERM_BP_DIRECT	GO:0097011~cellular response to granulocyte macrophage colony-stimulating factor stimulus	7	0.12385	0.01047	ZFP36, PDE1B, NPR2, PDE2A, MAPK1, ETV3, ZFP36L2	4969	8	16792	2.95693	1	0.676331	0.672363
GOTERM_BP_DIRECT	GO:0002467~germinal center formation	7	0.12385	0.01047	MEF2C, ADAM17, BCL6, KLHL6, CXCL13, UNC13D, NFKB2	4969	8	16792	2.95693	1	0.676331	0.672363
GOTERM_BP_DIRECT	GO:0007411~axon guidance	62	1.09696	0.0105715	ROBO3, NRP1, GLI3, GLI2, RPS6KA5, CHL1, TUBB3, KIF5C, DPYSL2, BOC, ZNF280C, EPHB2, SPTAN1, HRAS, SCN1B, SEMA6A, FOXD1, UNC5A, WNT5A, GFRA3, FEZ1, FEZ2, PLA2G10, ANOS1, EVL, PRKCQ, SOS1, MATN2, MEG3, SPTBN4, SEMA3C, LAMA2, SEMA3B, NTN4, GATA3, NRAS, RELN, FLRT2, FLRT3, MAPK1, SLIT3, SLIT2, MYH10, SPTBN1, SPTBN2, MAPK3, VASP, LAMB2, SIAH2, BMP7, PTK2, EFNA1, EXT1, TTC8, NFASC, EFNA2, CXCL12, LHX2, …	4969	159	16792	1.31773	1	0.677423	0.673448
GOTERM_BP_DIRECT	GO:0030224~monocyte differentiation	11	0.194621	0.0114024	BMP4, MEF2C, JUN, CSF2, PDE1B, PDE2A, PIR, MT1G, PPARG, THOC5, VEGFA	4969	17	16792	2.18664	1	0.719157	0.714937
GOTERM_BP_DIRECT	GO:0042325~regulation of phosphorylation	11	0.194621	0.0114024	BARD1, IKBKB, PPP1R14A, PPP1R14B, PPP1R14C, MCM7, LIMK2, RAD17, CD24, BMP7, ENG	4969	17	16792	2.18664	1	0.719157	0.714937
GOTERM_BP_DIRECT	GO:0007018~microtubule-based movement	35	0.61925	0.0116091	DYNC1I2, DNAH6, KIF14, KIF11, KIF17, KIF15, KLC2, RACGAP1, KIF5C, KIF13B, AP2S1, KIF21A, KIF21B, KIF3C, KIF1A, AP2M1, DYNC2H1, DNAH12, DNAH14, KIF24, KIF23, KIF22, KTN1, CENPE, KIF18A, KIF18B, KIF2A, KIFC2, KIFC1, KIF16B, KIF4A, DYNLRB2, KIF2C, KIF20A, ACTR10	4969	81	16792	1.46021	1	0.726474	0.722211
GOTERM_BP_DIRECT	GO:0032212~positive regulation of telomere maintenance via telomerase	17	0.300778	0.0119721	CCT3, CCT2, ACD, AURKB, CCT6A, PKIB, HMBOX1, DKC1, MAPK1, MAPKAPK5, NEK2, PRKCQ, MAP2K7, HNRNPA1, CCT7, CCT5, MAPK3	4969	32	16792	1.79528	1	0.740283	0.735939
GOTERM_BP_DIRECT	GO:0051897~positive regulation of protein kinase B signaling	36	0.636943	0.0120146	SEMA5A, SRC, ITSN1, GATA3, PARK7, TXN, FGF2, TNF, STK3, MTDH, RASD2, MYDGF, THPO, CPNE1, GCNT2, CCR7, TNFAIP8L3, STOX1, ARFGEF1, XBP1, F10, AKR1C3, IGF2, VEGFB, MEIS3, F3, PTK2, F7, PINK1, LEP, SPRY2, ADAM8, TEK, HPSE, GAS6, TSPYL5	4969	84	16792	1.44829	1	0.740283	0.735939
GOTERM_BP_DIRECT	GO:0050900~leukocyte migration	49	0.86695	0.0130439	CD84, PROS1, ITGB2, SIRPG, TREM1, GRB14, ITGAX, ITGAV, SLC16A3, CD34, HRAS, MMP1, ITGA3, ATP1B3, MIF, ATP1B1, MMP9, PROCR, SLC7A5, MAG, DOK2, SLC7A6, SLC7A7, SLC7A8, LCK, GAS6, SOS1, PPIA, GRB7, SRC, FPR3, SLC3A2, PIK3R1, NRAS, PLCG1, JAM2, JAM3, LYN, YES1, CAV1, MSN, SELP, CD2, COL1A1, COL1A2, KRAS, GRB2, ESAM, TEK	4969	122	16792	1.35728	1	0.797571	0.792891
GOTERM_BP_DIRECT	GO:0001890~placenta development	18	0.318471	0.0137593	DLX3, HSP90AB1, CITED1, HTRA1, ASCL2, DCN, PTK2, SOD1, GJB3, ALKBH1, LEP, ANG, PPARG, NDP, PHLDA2, ADA, E2F7, E2F8	4969	35	16792	1.73795	1	0.825955	0.821108
GOTERM_BP_DIRECT	GO:0031648~protein destabilization	18	0.318471	0.0137593	MYLIP, XBP1, GSN, CDKN2A, PRKDC, SRC, PLK1, DERL1, SIRT1, CHFR, TMEM147, SOX17, ID1, FBXO4, FBXL3, BTRC, ISOC2, SNCA	4969	35	16792	1.73795	1	0.825955	0.821108
GOTERM_BP_DIRECT	GO:1904874~positive regulation of telomerase RNA localization to Cajal body	10	0.176929	0.0138175	CCT3, CCT6A, CCT2, DKC1, RUVBL2, RUVBL1, NHP2, CCT7, NOP10, CCT5	4969	15	16792	2.2529	1	0.825955	0.821108
GOTERM_BP_DIRECT	GO:0043161~proteasome-mediated ubiquitin-dependent protein catabolic process	76	1.34466	0.0139428	GSK3B, KIF14, ARRB1, PSMD8, CDC20, TRIM9, UCHL1, PSMD7, PSMD2, PSMD3, PSMD1, BTRC, GTSE1, SKP1, FBXO15, RAD23A, PPP2R5C, SIRT1, KLHL42, PSMA5, PSMA6, PSMA3, PSMA4, CDC34, DDIT3, PSME4, TRIM13, SPOPL, PSME2, ANAPC4, ANAPC1, AMER1, PSMD12, VCP, PSMD11, ANAPC16, PSMD14, PSMD13, CUL1, NEDD4L, PSMA7, PSMB10, ANAPC11, PCNP, PSMB6, PSMB7, PSMB4, RMND5A, PSMB5, SHARPIN, PSMB2, PSMB3, BTBD3, UBC, PSMB1, S…	4969	203	16792	1.26518	1	0.827273	0.822419
GOTERM_BP_DIRECT	GO:0007052~mitotic spindle organization	16	0.283086	0.0147825	GPSM2, STIL, PLK2, TTK, WDR62, KIF11, EML1, NDC80, AURKA, CCNB1, KIF2A, STMN1, RCC1, PCNT, CLASP2, SPC25	4969	30	16792	1.80232	1	0.864291	0.85922
GOTERM_BP_DIRECT	GO:0044344~cellular response to fibroblast growth factor stimulus	16	0.283086	0.0147825	TBX1, POSTN, EGR3, CXCL8, ZFP36L2, ZFP36L1, COL1A1, GCLC, ZFP36, CPS1, MYC, LHX1, CCL5, SNAI2, GCLM, SNCA	4969	30	16792	1.80232	1	0.864291	0.85922
GOTERM_BP_DIRECT	GO:0002040~sprouting angiogenesis	14	0.2477	0.0154382	NRP1, RAMP2, NOTCH1, LEF1, SEMA3E, PARVA, JMJD6, RNF213, ADGRA2, OTULIN, TEK, E2F7, ENG, E2F8	4969	25	16792	1.89244	1	0.884534	0.879343
GOTERM_BP_DIRECT	GO:2000134~negative regulation of G1/S transition of mitotic cell cycle	14	0.2477	0.0154382	RB1, KANK2, FHL1, PTEN, CTDSPL, JADE1, PKD2, SMARCA4, CTDSP1, CTDSP2, BCL2, BRD7, E2F7, EZH2	4969	25	16792	1.89244	1	0.884534	0.879343
GOTERM_BP_DIRECT	GO:0018107~peptidyl-threonine phosphorylation	19	0.336164	0.01546	ACVR1, GSK3B, OSR1, CAD, STK39, LMTK2, TTK, ACVR1B, TGFBR2, CLK1, CDK5, WNK1, CHEK1, BCL2, CDK1, MAPK1, MARK2, MAP3K12, CDK5R1	4969	38	16792	1.68968	1	0.884534	0.879343
GOTERM_BP_DIRECT	GO:0043066~negative regulation of apoptotic process	157	2.77778	0.0156896	ARL6IP1, ZFAND6, CIB1, FAIM2, PARK7, IFIT3, AQP1, IGF1R, COMP, EDNRB, CCND2, MYC, ARHGDIA, PIM1, CAPN3, PIM2, TP63, TGM2, PDGFRB, BNIP3L, PRKCI, OSR1, WNT5A, MIF, ATAD3A, PIAS1, PPIF, RAF1, ATF5, IL6ST, PRKDC, GLO1, HPN, TWIST2, TGFA, PIK3R1, HIGD1A, HSP90B1, SLC9A1, MTDH, SOCS2, PRDX3, PKHD1, PRDX5, GRK5, IRAK1, PDCD10, FIGNL1, UBC, NCKAP1L, NKX2-5, BARD1, TFAP2B, STAT5B, XBP1, STIL, EGR3, UBE2B…	4969	455	16792	1.16606	1	0.891301	0.886071
GOTERM_BP_DIRECT	GO:0045669~positive regulation of osteoblast differentiation	27	0.477707	0.0162	FBN2, CEBPB, BMPR2, FGF2, ATRAID, GLI3, GJA1, PDLIM7, TP63, CD276, ACVR1, SMAD1, MEF2C, ZHX3, JAG1, SOX11, IGF1, NPNT, BMP7, BMP4, SFRP2, TMEM119, GNAS, PRKD1, BMPR1B, IL6ST, LTF	4969	60	16792	1.52071	1	0.896138	0.89088
GOTERM_BP_DIRECT	GO:0051607~defense response to virus	63	1.11465	0.0162654	CD86, CXCL9, CD40, FCN3, PRF1, ADAR, DDX41, IFIT1, LYST, IFI44L, IFIT3, OASL, IFIT2, PYCARD, ITGAX, IFNAR2, BNIP3L, RSAD2, UNC13D, DNAJC3, PLSCR1, IFNG, OAS1, CD8A, OAS2, IL23A, IRF1, DDIT4, TLR8, IRF9, TRIM11, TLR3, IFNAR1, BECN1, UNC93B1, NLRC5, ZC3HAV1, EXOSC5, EXOSC4, IFNL1, NLRP3, ABCF3, GBP1, MICA, IL33, APOBEC3H, STAT1, MX2, CARD9, MX1, EIF2AK2, ISG15, ISG20, AGBL5, CXCL10, POLR3A, GPAM, P…	4969	165	16792	1.2903	1	0.896138	0.89088
GOTERM_BP_DIRECT	GO:0014070~response to organic cyclic compound	23	0.406936	0.0163987	LYN, G6PD, BTG2, CPT1A, ABCD3, KCNC2, LUM, EIF4A3, COMT, MKI67, ACACB, DUSP6, ACAT1, EDNRB, POLR2A, PSMB2, CDK1, ANXA7, PLIN2, BAK1, SLC37A4, FADS1, TAF2	4969	49	16792	1.58623	1	0.896138	0.89088
GOTERM_BP_DIRECT	GO:0007005~mitochondrion organization	33	0.583864	0.0165148	STOML2, EPAS1, PARK7, GABPB1, PRDX3, HMGCL, CHCHD2, SHARPIN, RHOT1, OPA1, MAN2A1, LONP1, DNM1L, ATP7A, PPARGC1B, GABPA, ESRRA, PTCD2, CLUH, AGTPBP1, CAV2, BCS1L, PPRC1, FANCG, HCFC1, SELENON, PINK1, DNAJA3, MTFR1, SSBP1, MTFR2, CEP89, EIF4G1	4969	77	16792	1.44829	1	0.896138	0.89088
GOTERM_BP_DIRECT	GO:0009168~purine ribonucleoside monophosphate biosynthetic process	9	0.159236	0.0166697	ADSL, ATIC, IMPDH1, IMPDH2, PPAT, GMPS, GART, PAICS, ADA	4969	13	16792	2.33955	1	0.896138	0.89088
GOTERM_BP_DIRECT	GO:0006518~peptide metabolic process	9	0.159236	0.0166697	NLN, DNPEP, CPXM2, CPD, CPXM1, AEBP1, CPZ, THOP1, PAM	4969	13	16792	2.33955	1	0.896138	0.89088
GOTERM_BP_DIRECT	GO:0033540~fatty acid beta-oxidation using acyl-CoA oxidase	9	0.159236	0.0166697	ACOT8, ACOX2, SCP2, ACOX1, NUDT19, HSD17B4, ACAA1, ABCD1, CRAT	4969	13	16792	2.33955	1	0.896138	0.89088
GOTERM_BP_DIRECT	GO:1900025~negative regulation of substrate adhesion-dependent cell spreading	9	0.159236	0.0166697	POSTN, DMTN, RCC2, TACSTD2, FBLN1, ACTN4, MELTF, GBP1, CORO1C	4969	13	16792	2.33955	1	0.896138	0.89088
GOTERM_BP_DIRECT	GO:0007165~signal transduction	377	6.67021	0.016791	SLC35B2, VIPR2, CALML5, RAPH1, ELK3, GJA1, EDNRA, ALCAM, RASSF4, RPS6KA2, DPYSL2, STMN1, TNFSF10, BTRC, ICOSLG, TBC1D10B, UNC13B, IL15RA, UNC5A, CSNK2A1, DAPK1, STARD8, PRKCE, ANK2, CSNK1D, PRKAB1, RUNX1, INPP4A, BCR, INPP4B, AR, BCAM, ZFYVE16, ADCY9, CLDN3, FEZ2, CSNK2B, TYRO3, TRIM13, SPARCL1, RIN3, PRKD1, RIN2, GRB7, PDE1B, RRAD, EPAS1, PDE1A, PEX11A, SH2D2A, PEX11B, FPR3, GATA3, TXN, PIK3R1, …	4969	1161	16792	1.09734	1	0.89664	0.891379
GOTERM_BP_DIRECT	GO:0030521~androgen receptor signaling pathway	20	0.353857	0.0170643	RB1, NCOA1, RNF14, TGFB1I1, NCOA3, FHL2, UBE3A, BRCA1, MED16, PIAS2, PIAS1, DNAJA1, AR, MED14, MED30, CCNE1, SCGB2A1, NRIP1, PMEPA1, PLPP1	4969	41	16792	1.64846	1	0.9052	0.899889
GOTERM_BP_DIRECT	GO:0001525~angiogenesis	82	1.45081	0.017236	GPI, NRP1, ROBO4, ECM1, CXCL8, PTEN, CIB1, RORA, FGF1, MEOX2, ELK3, TMEM100, MYDGF, HEY1, SOX17, SOX18, LEPR, ITGAV, EPHB2, ANXA2, SYK, MMP2, VEZF1, SIRT1, RHOB, OVOL2, EMCN, NCL, COL8A2, HOXB3, COL8A1, ANG, ADAM8, PRKD1, SCG2, RAPGEF3, S100A7, RAMP2, CALCRL, TMPRSS6, EPAS1, SH2D2A, TGFA, NDNF, PRKX, RASIP1, TYMP, ARHGAP22, RNF213, PDCD10, CXCR3, S1PR1, HMOX1, APOD, JAM3, SRPK2, TBX1, NUS1, JUN, …	4969	223	16792	1.24263	1	0.908292	0.902963
GOTERM_BP_DIRECT	GO:0010033~response to organic substance	15	0.265393	0.0182831	AQP9, WNT5A, XRCC3, GLRX2, SUPT5H, CRIP1, SOD1, PPP2CA, SQLE, TIMP3, S100P, CASQ1, GART, TIMP4, CTSC	4969	28	16792	1.81037	1	0.940143	0.934626
GOTERM_BP_DIRECT	GO:0090200~positive regulation of release of cytochrome c from mitochondria	15	0.265393	0.0182831	HRK, MOAP1, PDCD5, PLAUR, MMP9, PYCARD, PINK1, BCL2L11, GPER1, TNFSF10, PPIF, BAX, BAK1, DNM1L, BID	4969	28	16792	1.81037	1	0.940143	0.934626
GOTERM_BP_DIRECT	GO:0060271~cilium morphogenesis	53	0.937721	0.0184253	SNX10, RPGR, PCM1, TCTN3, TCTN1, IQUB, TEKT3, NEK1, CC2D2A, BBS5, BBS4, RAB8A, DYNC2H1, IQCB1, ACTR3, IFT140, DNAAF1, TTC21A, KIF24, WDR35, DNM2, IFT88, IFT43, RILPL2, TMEM138, NME8, IFT46, CCNO, UNC119B, NOTCH1, INTU, ARL3, ASAP1, PKHD1, IFT74, STK36, FLNA, NPHP3, CFAP20, ATP6V1D, BBS2, BBS1, GSN, WDR19, SCLT1, PARVA, IFT20, EHD1, AHI1, TTC8, TMEM237, RAB17, CEP89	4969	136	16792	1.31695	1	0.940143	0.934626
GOTERM_BP_DIRECT	GO:0001938~positive regulation of endothelial cell proliferation	30	0.530786	0.0184373	SEMA5A, NRP1, ECM1, BMPR2, HMGB2, HTR2B, FGF2, THBS4, RPTOR, MYDGF, STAT5A, JUN, EGR3, CAV2, WNT5A, VASH2, VEGFB, CYBA, F3, SIRT1, VEGFA, BMP4, PDCL3, CXCL12, PLXNB3, AGGF1, ANG, PRKD1, TEK, SCG2	4969	69	16792	1.46928	1	0.940143	0.934626
GOTERM_BP_DIRECT	GO:0006094~gluconeogenesis	21	0.37155	0.0185675	SLC25A1, GPI, SDS, TPI1, GOT1, MDH1, MDH2, ENO1, PER2, RBP4, G6PC3, GPD1, PGK1, ALDOC, SLC25A10, SLC25A12, GAPDH, FBP1, PCK2, ATF4, SLC25A13	4969	44	16792	1.61287	1	0.940143	0.934626
GOTERM_BP_DIRECT	GO:0006629~lipid metabolic process	60	1.06157	0.0186582	IL1RN, NAA40, PITPNB, GDE1, FADS2, HNF4A, LIPG, CPNE1, CD36, FADS1, ACAD8, SREBF1, STARD3, G6PD, TPRA1, HMGCS1, CEL, CH25H, PITPNM1, ACOX1, PPARG, FAR2, PLIN1, PLPP3, PLPP1, PPARD, LIPT1, ASAH1, LPL, OMA1, LRP2, PLCXD1, HSD17B10, LRP8, ACAT2, HMGCL, LCN12, ALDH3B1, RDH16, NPHP3, SC5D, PLAGL2, APOD, LDLR, JAZF1, PTPRN2, PNPLA7, CHKA, PLCL1, CIDEA, NR2F2, PLCXD3, FABP5, FABP6, LEP, APOC1, THRSP, CH…	4969	157	16792	1.29147	1	0.940143	0.934626
GOTERM_BP_DIRECT	GO:0061512~protein localization to cilium	11	0.194621	0.0189336	EHD1, IFT20, BBS1, IFT140, TTC21A, BBS9, CSNK1D, SNX10, WDR35, ATP6V1D, BBS4	4969	18	16792	2.06516	1	0.940143	0.934626
GOTERM_BP_DIRECT	GO:0060324~face development	11	0.194621	0.0189336	MAP2K1, ALDH1A2, WNT5A, CHD7, MAPK1, HOXB3, BRAF, RAF1, GRHL2, BBS4, MAPK3	4969	18	16792	2.06516	1	0.940143	0.934626
GOTERM_BP_DIRECT	GO:0071539~protein localization to centrosome	11	0.194621	0.0189336	PCM1, STIL, SPAG5, CCDC14, CEP131, CSNK1D, SNX10, PIBF1, BBS4, MCPH1, AURKA	4969	18	16792	2.06516	1	0.940143	0.934626
GOTERM_BP_DIRECT	GO:0007017~microtubule-based process	18	0.318471	0.0190141	TUBB, TUBB4B, TUBB4A, DYNLL2, TUBA4A, EML4, TUBB8, TUBA3E, TUBA1C, TUBA1B, TUBA3D, TUBA1A, TUBA3C, TUBB3, NEK10, GTSE1, MAP3K11, PAFAH1B1	4969	36	16792	1.68968	1	0.940143	0.934626
GOTERM_BP_DIRECT	GO:1900034~regulation of cellular response to heat	32	0.566171	0.0196765	CAMK2B, GSK3B, NUP205, SEH1L, NUP107, HSP90AB1, NUP188, NUP160, RPTOR, HSPH1, POM121C, NUP85, NUP62, CHORDC1, HSF1, MAPK1, NUP88, RAE1, CAMK2G, MAPK3, NDC1, CREBBP, HSP90AA1, NUP155, HSPA1L, NUP210, NUP153, SIRT1, NUP93, NUP50, NUP98, NUP37	4969	75	16792	1.44186	1	0.966924	0.961251
GOTERM_BP_DIRECT	GO:0051279~regulation of release of sequestered calcium ion into cytosol	8	0.141543	0.0199578	LYN, DIAPH1, UBASH3B, PRKCE, ANK2, CYBA, PRKD1, CORO1A	4969	11	16792	2.45771	1	0.96886	0.963176
GOTERM_BP_DIRECT	GO:0006600~creatine metabolic process	8	0.141543	0.0199578	GAMT, CKMT2, STAT5A, STAT5B, GATM, SLC6A8, CKM, CKMT1B	4969	11	16792	2.45771	1	0.96886	0.963176
GOTERM_BP_DIRECT	GO:0010332~response to gamma radiation	16	0.283086	0.0209463	PRKDC, DCUN1D3, GATA3, SOD2, CXCL10, CCL7, FANCD2, CHEK2, MYC, BCL2, TRIM13, BAX, BAK1, TP63, POLG, MEN1	4969	31	16792	1.74418	1	1	0.994256
GOTERM_BP_DIRECT	GO:0043123~positive regulation of I-kappaB kinase/NF-kappaB signaling	61	1.07926	0.0213357	SLC35B2, CD40, ECM1, HTR2B, FASLG, TNF, TRIM8, IKBKB, TMEM101, GJA1, NUP62, TNFSF10, CCR7, PIM2, CD36, LGALS9, IKBKE, MAP3K7, TGM2, WLS, TICAM2, RIPK2, PRKCE, TNFRSF19, ZDHHC13, ZDHHC17, MID2, GPRC5B, TRAF5, TLR9, TRIM13, UBE2V1, PRKD1, CARD11, LTF, SLC20A1, PELI2, LPAR1, ZC3HAV1, NOD2, MTDH, SHARPIN, IRAK1, UBD, UBC, MIER1, S100A13, FLNA, HMOX1, ECT2, LURAP1, UBE2I, PLK2, NEK6, CARD9, TNFRSF10B,…	4969	161	16792	1.28038	1	1	0.994256
GOTERM_BP_DIRECT	GO:0001501~skeletal system development	53	0.937721	0.021337	CDKN1C, HEXB, NCAN, CHD7, PTH1R, HAPLN3, ETS2, GLI2, HOXA10, COMP, WDR5, PITX1, SOX4, TP63, CMKLR1, TEAD4, POSTN, IGFBP4, EN1, SOX11, MMP9, VCAN, EVC, CDH11, MATN3, CHRD, HOXD13, TNFRSF11B, AEBP1, PTHLH, DLL3, RAI1, EBP, TCOF1, FRZB, PRDX1, USP1, GDF10, ACD, ZBTB16, IGF2, IGF1, BMP7, TBX3, EXT1, COL1A1, COL3A1, COL1A2, GNAQ, COL5A2, TLL1, BMPR1B, FBN1	4969	137	16792	1.30734	1	1	0.994256
GOTERM_BP_DIRECT	GO:0000732~strand displacement	14	0.2477	0.0226557	BARD1, BLM, RMI2, RMI1, TOP3A, XRCC3, BRCA1, PALB2, RAD51AP1, RAD51D, RAD51, RAD51C, EXO1, DNA2	4969	26	16792	1.81965	1	1	0.994256
GOTERM_BP_DIRECT	GO:0045070~positive regulation of viral genome replication	14	0.2477	0.0226557	SRPK2, TOP2A, NOTCH1, STAU1, ADAR, RAD23A, IFIT1, SRPK1, LARP1, NR5A2, CCL5, PPIH, PABPC1, PPIA	4969	26	16792	1.81965	1	1	0.994256
GOTERM_BP_DIRECT	GO:0060068~vagina development	7	0.12385	0.0235666	RBP4, LHX1, WNT5A, TYRO3, BAX, BAK1, ESR1	4969	9	16792	2.62838	1	1	0.994256
GOTERM_BP_DIRECT	GO:0097105~presynaptic membrane assembly	7	0.12385	0.0235666	PTPRD, NLGN1, NLGN2, NLGN4X, IL1RAPL1, PTEN, LRP4	4969	9	16792	2.62838	1	1	0.994256
GOTERM_BP_DIRECT	GO:0006265~DNA topological change	7	0.12385	0.0235666	TOP2A, TOP3B, ERCC3, TOP1MT, TOP3A, HMGB2, TOP1	4969	9	16792	2.62838	1	1	0.994256
GOTERM_BP_DIRECT	GO:0000132~establishment of mitotic spindle orientation	12	0.212314	0.0237391	GPSM2, NUMA1, ZW10, SPRY2, SPRY1, SPDL1, CENPA, NDC80, WDR43, MCPH1, PAFAH1B1, FGF10	4969	21	16792	1.93106	1	1	0.994256
GOTERM_BP_DIRECT	GO:0036498~IRE1-mediated unfolded protein response	26	0.460014	0.0245955	ACADVL, GOSR2, ADD1, SEC61A2, MYDGF, SEC61A1, TATDN2, SEC61G, SEC63, KLHDC3, XBP1, HSPA5, WFS1, DDX11, PPP2R5B, PDIA6, YIF1A, ARFGAP1, DNAJC3, JMJD7-PLA2G4B, CTDSP2, DNAJB11, SRPRB, PREB, HYOU1, HDGF	4969	59	16792	1.48921	1	1	0.994256
GOTERM_BP_DIRECT	GO:0009408~response to heat	22	0.389243	0.0258165	HSP90AA1, TGFB1I1, TRPV2, OSM, PSIP1, HSPA2, IGF1, HSPD1, SOD1, DNAJA1, GCLC, CXCL12, DNAJA3, TP53INP1, HSF1, DNAJA2, IGFBP7, CASQ1, MAP2K7, ASIC3, MICA, LRP11	4969	48	16792	1.54887	1	1	0.994256
GOTERM_BP_DIRECT	GO:0000289~nuclear-transcribed mRNA poly(A) tail shortening	15	0.265393	0.0259054	EIF4A2, EIF4A3, SAMD4A, SAMD4B, PAN2, ZFP36, PAN3, CNOT1, CNOT11, CNOT3, PABPC1, CNOT8, CNOT9, EIF4B, EIF4G1	4969	29	16792	1.74794	1	1	0.994256
GOTERM_BP_DIRECT	GO:0051973~positive regulation of telomerase activity	15	0.265393	0.0259054	CCT2, ACD, KLF4, GRHL2, AURKB, PKIB, HMBOX1, DKC1, MYC, MAPK1, MAPKAPK5, NEK2, PRKCQ, MAP2K7, MAPK3	4969	29	16792	1.74794	1	1	0.994256
GOTERM_BP_DIRECT	GO:0006886~intracellular protein transport	85	1.50389	0.0261523	IPO13, USP6NL, CHM, IPO4, TOMM22, RPGR, XPO1, XPO6, TIMM17A, TIMM17B, TLK1, VPS35, ARFIP1, TNPO1, TNPO2, SIL1, AP2M1, VPS39, TBC1D22B, TBC1D10B, WLS, YWHAH, COG7, STX8, TBC1D8, AP1B1, SYTL1, COPZ2, TBC1D9, AP3B1, MYO7A, MYRIP, SYTL4, COPZ1, SYTL3, RHOB, SYTL2, HGS, KDELR2, STAM2, SLU7, STX1A, STX12, RAMP2, RAMP3, TMED10, STX17, UNC93B1, SNX33, NAPG, STX11, GGA2, SNX1, SNX2, GGA3, MYO6, TBC1D13, V…	4969	236	16792	1.21714	1	1	0.994256
GOTERM_BP_DIRECT	GO:0030335~positive regulation of cell migration	68	1.20311	0.026653	SEMA5A, ONECUT2, CIB1, IRS2, FGF1, IGF1R, MYLK, PLAU, GPER1, ITGAV, GTSE1, HRAS, PDGFRB, ACVR1, SEMA6D, SPHK1, ACTN4, F3, ADRA2A, F7, ADAM17, NUMB, ROR2, MAPRE1, CBLL1, GRB7, SEMA7A, NOTCH1, SEMA3C, SEMA3B, LEF1, SEMA3G, SEMA3E, PIK3R1, CORO1A, FAM83H, WNT11, CCL7, PDCD10, PDGFD, CCL5, NTF3, PDGFC, GCNT2, S1PR1, MAPK1, CCR1, SPAG9, LYN, CARMIL2, XBP1, SEMA4D, HSPA5, F10, ARHGEF39, SEMA4C, ELP3, I…	4969	184	16792	1.24889	1	1	0.994256
GOTERM_BP_DIRECT	GO:0006396~RNA processing	39	0.690021	0.0269046	CSTF3, YTHDC2, RTCA, ADAR, TRMT2B, SYNCRIP, ATXN1, HNRNPDL, PABPN1, DHX34, SNRPD1, EXOSC9, DHX36, CSTF1, DHX37, RBM5, DDX17, RNGTT, RBPMS, PABPC4, LARP7, DDX54, DICER1, WBP11, LSM4, U2SURP, CHERP, MRPL44, HNRNPL, PRPF4, LSM7, HNRNPK, DKC1, NOVA1, HNRNPD, AGGF1, MPHOSPH10, RBMS1, DHX29	4969	97	16792	1.35871	1	1	0.994256
GOTERM_BP_DIRECT	GO:0060449~bud elongation involved in lung branching	6	0.106157	0.0270789	BMP4, YAP1, RDH10, SPRY2, SPRY1, FGF10	4969	7	16792	2.89659	1	1	0.994256
GOTERM_BP_DIRECT	GO:0006734~NADH metabolic process	6	0.106157	0.0270789	VCP, MDH1, MDH2, OGDH, GPD1L, MDH1B	4969	7	16792	2.89659	1	1	0.994256
GOTERM_BP_DIRECT	GO:1900264~positive regulation of DNA-directed DNA polymerase activity	6	0.106157	0.0270789	RFC5, RFC3, RFC4, RFC2, DSCC1, CHTF18	4969	7	16792	2.89659	1	1	0.994256
GOTERM_BP_DIRECT	GO:0046826~negative regulation of protein export from nucleus	6	0.106157	0.0270789	BARD1, CDK5, PARK7, TXN, RANGAP1, SOX4	4969	7	16792	2.89659	1	1	0.994256
GOTERM_BP_DIRECT	GO:0032481~positive regulation of type I interferon production	23	0.406936	0.0271838	CREBBP, XRCC6, SYK, POLR3GL, PRKDC, DDX41, ZC3HAV1, NFKB1, NFKB2, POLR3A, IRAK1, IRF1, POLR3D, DHX36, POLR1C, IRF7, POLR2F, POLR3G, POLR3H, STAT6, POLR2H, MYD88, POLR2L	4969	51	16792	1.52402	1	1	0.994256
GOTERM_BP_DIRECT	GO:0031146~SCF-dependent proteasomal ubiquitin-dependent protein catabolic process	13	0.230007	0.0281355	FBXW4, FBXW7, CUL1, KIF14, FBXO36, FBXL15, FBXO4, FBXL3, FBXO6, FBXL2, BTRC, FBXL5, SKP1	4969	24	16792	1.83048	1	1	0.994256
GOTERM_BP_DIRECT	GO:0070371~ERK1 and ERK2 cascade	13	0.230007	0.0281355	MAP2K1, MAP2K2, HTR2B, IGF1, IQGAP3, ZFP36L2, ZFP36L1, MAPK1, ITGAV, AVP, LGALS9, FGF10, MAPK3	4969	24	16792	1.83048	1	1	0.994256
GOTERM_BP_DIRECT	GO:0003091~renal water homeostasis	16	0.283086	0.0288647	TFAP2B, WFS1, ADCY4, ADCY2, ADCY1, ADCY7, CYP4F12, ADCY6, RAB11A, AQP1, ADCY9, PRKAR1B, MYO5B, GNAS, AVP, RAB11FIP2	4969	32	16792	1.68968	1	1	0.994256
GOTERM_BP_DIRECT	GO:0000462~maturation of SSU-rRNA from tricistronic rRNA transcript (SSU-rRNA, 5.8S rRNA, LSU-rRNA)	16	0.283086	0.0288647	UTP6, NOP14, UTP23, HEATR1, CCDC59, NOC4L, PWP2, WDR46, BYSL, EMG1, MRPS9, RPS19, BMS1, RRP36, RPS24, DCAF13	4969	32	16792	1.68968	1	1	0.994256
GOTERM_BP_DIRECT	GO:2000353~positive regulation of endothelial cell apoptotic process	9	0.159236	0.0289294	PRKCI, XBP1, CD40, RGCC, GPER1, AKR1C3, FASLG, CD248, ANO6	4969	14	16792	2.17244	1	1	0.994256
GOTERM_BP_DIRECT	GO:1901224~positive regulation of NIK/NF-kappaB signaling	9	0.159236	0.0289294	AGO3, AGO1, EIF2AK2, ACTN4, CALR, NOD2, TNF, SASH1, RC3H2	4969	14	16792	2.17244	1	1	0.994256
GOTERM_BP_DIRECT	GO:0042176~regulation of protein catabolic process	9	0.159236	0.0289294	XPO1, HGS, CHEK2, ODC1, PSMD3, PSMD1, NEDD4L, SNF8, FAM83D	4969	14	16792	2.17244	1	1	0.994256
GOTERM_BP_DIRECT	GO:0046651~lymphocyte proliferation	5	0.0884643	0.0292212	HELLS, FLT3, IMPDH1, IMPDH2, HPRT1	4969	5	16792	3.37935	1	1	0.994256
GOTERM_BP_DIRECT	GO:1990441~negative regulation of transcription from RNA polymerase II promoter in response to endoplasmic reticulum stress	5	0.0884643	0.0292212	PPP1R15A, JUN, NCK2, TMBIM6, NCK1	4969	5	16792	3.37935	1	1	0.994256
GOTERM_BP_DIRECT	GO:0000727~double-strand break repair via break-induced replication	5	0.0884643	0.0292212	MUS81, GINS2, CDC45, GINS4, CDC7	4969	5	16792	3.37935	1	1	0.994256
GOTERM_BP_DIRECT	GO:0045638~negative regulation of myeloid cell differentiation	11	0.194621	0.0295439	ZFP36, MEIS1, RBM15, ZBTB16, CTR9, LEO1, HMGB3, WDR61, HOXB8, DLL1, MEIS2	4969	19	16792	1.95647	1	1	0.994256
GOTERM_BP_DIRECT	GO:0043523~regulation of neuron apoptotic process	11	0.194621	0.0295439	MEF2C, G6PD, GRM4, EGLN2, SIGMAR1, KIF14, FAIM2, GATA3, NAE1, PARK7, TP63	4969	19	16792	1.95647	1	1	0.994256
GOTERM_BP_DIRECT	GO:1903955~positive regulation of protein targeting to mitochondrion	35	0.61925	0.0304832	OSCP1, GLS2, U2AF1, HNMT, WDR46, SELENOI, PSMD8, NPEPPS, CYB5R1, UGCG, PSMB7, ABLIM3, SLC17A9, U2AF2, CTSK, RUVBL1, VPS11, ITGAX, ARIH2, PLAGL2, HES1, PRELID3A, NBPF3, LRRC46, HSPA1L, STARD7, FBXW7, ACTL6A, CSNK2A2, HUWE1, WBP11, PINK1, POLR3A, TOMM7, SAE1	4969	86	16792	1.37532	1	1	0.994256
GOTERM_BP_DIRECT	GO:0006284~base-excision repair	17	0.300778	0.0315411	POLQ, USP47, FEN1, LIG1, PARP2, HMGA1, HUWE1, APEX2, UNG, RECQL4, NEIL3, NEIL2, TDG, DNA2, NEIL1, CCNO, MUTYH	4969	35	16792	1.6414	1	1	0.994256
GOTERM_BP_DIRECT	GO:0032728~positive regulation of interferon-beta production	14	0.2477	0.0320981	RIPK2, HMGB2, ZBTB20, ZC3HAV1, IFIH1, RNF135, POLR3A, IRF1, POLR3D, IRF7, TLR9, POLR3G, TLR3, IFNAR1	4969	27	16792	1.75226	1	1	0.994256
GOTERM_BP_DIRECT	GO:0007507~heart development	67	1.18542	0.0338666	CITED2, HTR2B, PTEN, ADM, ECE2, PKD2, PCSK5, GLI3, GLI2, CRKL, GYS1, GJA1, PPP3CB, EDNRA, RPS6KA2, CC2D2A, SOX4, ACVR1, MEF2A, MAP2K1, MEF2C, IFT140, NCOA6, ITGA3, HEG1, OSR1, CAD, AP1B1, KCNAB1, TGFBR2, JMJD6, ADAM19, RIPPLY3, RBP4, MTHFD1, TFDP2, PPARG, RAF1, PPARD, RAMP2, CALCRL, NOTCH1, PCNA, PRKDC, PTN, CACNA1C, GATA3, CRIP1, ZFP36L1, IFT74, ERBB3, FLRT3, XIRP1, SMYD2, NKX2-5, MAP2K5, TBX1, …	4969	183	16792	1.23725	1	1	0.994256
GOTERM_BP_DIRECT	GO:0010811~positive regulation of cell-substrate adhesion	18	0.318471	0.0339498	ECM2, EGFL6, ITGA3, PRKCE, NDNF, PTN, NID1, NPNT, FBLN2, SMOC2, CCDC80, EGFLAM, ABI3BP, SPOCK2, AGR2, COL8A1, RELL2, EDIL3	4969	38	16792	1.60075	1	1	0.994256
GOTERM_BP_DIRECT	GO:0001568~blood vessel development	18	0.318471	0.0339498	TBX1, MEF2C, DLX3, SPHK2, LAMA4, SPHK1, TBX3, TGFBR2, CRKL, COL1A1, FOXS1, COL1A2, ALDH1A2, GJA4, FLVCR1, ITGAV, PLPP3, ATP7A	4969	38	16792	1.60075	1	1	0.994256
GOTERM_BP_DIRECT	GO:0030522~intracellular receptor signaling pathway	18	0.318471	0.0339498	NCOA1, ESRRA, THRA, NCOA3, STAT3, RORC, NR2F1, RORA, RORB, NR2F2, SLA2, NR2F6, NR4A2, AR, NR5A2, HNF4A, BRD8, PPARD	4969	38	16792	1.60075	1	1	0.994256
GOTERM_BP_DIRECT	GO:0050718~positive regulation of interleukin-1 beta secretion	12	0.212314	0.0350298	PANX1, PYCARD, NLRP12, AIM2, IFNG, CASP5, WNT5A, PYDC1, NLRP3, LGALS9, NOD2, IFNAR1	4969	22	16792	1.84328	1	1	0.994256
GOTERM_BP_DIRECT	GO:0010719~negative regulation of epithelial to mesenchymal transition	12	0.212314	0.0350298	FOXA1, EFNA1, MAD2L2, PPP2CA, SFRP2, HPN, DACT3, STRAP, LDLRAD4, VASN, PBLD, OVOL2	4969	22	16792	1.84328	1	1	0.994256
GOTERM_BP_DIRECT	GO:0043085~positive regulation of catalytic activity	33	0.583864	0.0353932	ARF1, NCF1, NCF4, HSPB2, NOXO1, MGST2, CIB1, LTC4S, APH1B, PITRM1, SH3PXD2A, PSAP, ATP7A, SLC37A4, TRIM23, CTSA, B3GAT3, CAV1, IGF2, AZIN2, SOD1, NR4A2, MMP15, APOC1, NOXA1, BCL2, UBA2, CLPSL2, SAE1, FGFR4, PPP1R12B, DCP1B, NSMAF	4969	81	16792	1.37677	1	1	0.994256
GOTERM_BP_DIRECT	GO:1900740~positive regulation of protein insertion into mitochondrial membrane involved in apoptotic signaling pathway	15	0.265393	0.0356379	GZMB, YWHAZ, DYNLL2, PPP3R1, BCL2L11, TFDP1, PPP3CC, YWHAQ, BCL2, TP53BP2, SFN, BID, YWHAG, TP63, YWHAH	4969	30	16792	1.68968	1	1	0.994256
GOTERM_BP_DIRECT	GO:0043097~pyrimidine nucleoside salvage	8	0.141543	0.0358071	CDA, UCK2, TK2, UPP1, TK1, DCK, TYMP, UCKL1	4969	12	16792	2.2529	1	1	0.994256
GOTERM_BP_DIRECT	GO:0006164~purine nucleotide biosynthetic process	8	0.141543	0.0358071	ADSL, ATIC, MTHFD1, OAS1, OAS2, IMPDH2, PPAT, HPRT1	4969	12	16792	2.2529	1	1	0.994256
GOTERM_BP_DIRECT	GO:0045086~positive regulation of interleukin-2 biosynthetic process	8	0.141543	0.0358071	CD86, STAT5B, CD4, CD80, GLMN, PRKCQ, CD3E, CARD11	4969	12	16792	2.2529	1	1	0.994256
GOTERM_BP_DIRECT	GO:0030198~extracellular matrix organization	71	1.25619	0.0366283	APP, COL16A1, OLFML2B, ECM2, ITGB5, COL14A1, NCAN, ELN, ITGB2, FGF2, TNF, LOXL1, COMP, IBSP, ADAMTSL2, ITGAX, ITGAV, ITGB7, ATP7A, POSTN, EGFL6, VWF, ITGA3, NPNT, DCN, VCAN, CCDC80, COL4A1, CRISPLD2, COL6A1, GFOD2, COL4A6, COL8A2, ITGA8, COL4A5, COL6A3, COL8A1, MATN3, FBN2, LAMA2, TMPRSS6, LAMA4, LAMA3, NDNF, FBLN1, TNFRSF11B, NID1, FBLN5, PRDX4, EGFLAM, ABI3BP, SPOCK2, NPHP3, JAM2, JAM3, LAMB2, …	4969	196	16792	1.22415	1	1	0.994256
GOTERM_BP_DIRECT	GO:0006606~protein import into nucleus	25	0.442321	0.0366357	IPO13, RPAIN, NUP107, NUP188, PPP1R10, CSE1L, ADAR, IPO9, POM121C, NUP85, NUP62, HEATR3, NUP88, KPNA2, RAE1, KPNA1, RANBP1, NUP155, STAT3, NUTF2, NUP153, NUP93, NUP50, CRY2, TXNIP	4969	58	16792	1.45662	1	1	0.994256
GOTERM_BP_DIRECT	GO:0051259~protein oligomerization	25	0.442321	0.0366357	BLM, STOML2, TMED10, AHNAK, TNFAIP3, NOD2, SLC6A4, SLC9A1, ACMSD, GJA1, WDCP, SNX2, IRAK1, TRIM28, NLRP3, HACL1, DNM1L, CAMK2G, CAV2, AR, PFKL, OAS1, NBR1, BAX, TEK	4969	58	16792	1.45662	1	1	0.994256
GOTERM_BP_DIRECT	GO:2000811~negative regulation of anoikis	10	0.176929	0.0368786	NTRK2, TLE1, NOTCH1, SRC, PTRH2, CAV1, BCL2, PDK4, SNAI2, PTK2	4969	17	16792	1.98785	1	1	0.994256
GOTERM_BP_DIRECT	GO:0030150~protein import into mitochondrial matrix	10	0.176929	0.0368786	TOMM40, GRPEL1, GRPEL2, DNLZ, TIMM17A, TOMM7, TIMM17B, TIMM23, TIMM44, TOMM22	4969	17	16792	1.98785	1	1	0.994256
GOTERM_BP_DIRECT	GO:0071456~cellular response to hypoxia	38	0.672328	0.0369606	EPAS1, SRC, PTEN, NDNF, RORA, PTN, NDRG1, SLC9A1, ZFP36L1, AQP1, GNGT1, NPEPPS, CCNB1, IRAK1, STC2, UBQLN1, EIF4EBP1, HMOX1, BNIP3L, KCND2, PRKCE, MST1, BMP7, SIRT1, VASN, VEGFA, CCNA2, CPEB1, PINK1, TBL2, RGCC, BCL2, HYOU1, ADAM8, MGARP, P4HB, CPEB2, PPARD	4969	96	16792	1.33766	1	1	0.994256
GOTERM_BP_DIRECT	GO:0010501~RNA secondary structure unwinding	20	0.353857	0.0380393	EIF4A2, DDX17, DDX18, DDX27, DDX49, DDX24, DDX55, DDX23, DDX56, EIF4A3, DDX31, DDX21, DDX54, DDX41, DDX19A, DDX39A, AGO3, AGO1, DHX36, AGO2	4969	44	16792	1.53607	1	1	0.994256
GOTERM_BP_DIRECT	GO:0060337~type I interferon signaling pathway	27	0.477707	0.0385232	IFI6, ADAR, IFIT1, IFIT3, IFIT2, OASL, JAK1, IP6K2, IFNAR2, EGR1, RSAD2, STAT1, MX2, MX1, HLA-B, ISG15, HLA-F, HLA-G, ISG20, OAS1, IFI27, OAS2, IRF1, IRF7, XAF1, IRF9, IFNAR1	4969	64	16792	1.42566	1	1	0.994256
GOTERM_BP_DIRECT	GO:0032436~positive regulation of proteasomal ubiquitin-dependent protein catabolic process	27	0.477707	0.0385232	GSK3B, VCP, RNF14, ZFAND2A, RNF19B, RCHY1, FBXO22, HSPBP1, AURKA, NKD2, RNF114, ARIH2, ARIH1, SOCS5, IL33, USP5, CSNK1A1, PLK2, PLK1, CSNK1D, CHFR, PIAS1, DAB2, GCLC, RNF125, UBE2V2, TRIB3	4969	64	16792	1.42566	1	1	0.994256
GOTERM_BP_DIRECT	GO:0031398~positive regulation of protein ubiquitination	27	0.477707	0.0385232	AMER1, PHF23, DERL1, ARRB1, UBE3A, ADRB2, BRCA1, RCHY1, HSPBP1, UBQLN1, FBXO4, CDK5RAP3, FANCI, CENPX, HSPA5, WFS1, FBXW7, RIPK2, CAV1, SPHK1, CHFR, AIMP2, PINK1, DNAJA3, TBC1D7, SPRTN, TSPYL5	4969	64	16792	1.42566	1	1	0.994256
GOTERM_BP_DIRECT	GO:0010634~positive regulation of epithelial cell migration	16	0.283086	0.0387817	JUN, BMPR2, SRC, ITGA3, PRKCE, RAB11A, TGFBR2, EPB41L5, IFNG, PLCG1, PFN1, TAC1, INSL3, DOCK1, FGF10, CLASP2	4969	33	16792	1.63847	1	1	0.994256
GOTERM_BP_DIRECT	GO:0070059~intrinsic apoptotic signaling pathway in response to endoplasmic reticulum stress	16	0.283086	0.0387817	PPP1R15A, GSK3B, XBP1, CEBPB, ITPR1, TNFRSF10B, TRAF2, AIFM1, DDIT3, BCL2, BAX, TRIB3, TMBIM6, BAK1, CHAC1, ATF4	4969	33	16792	1.63847	1	1	0.994256
GOTERM_BP_DIRECT	GO:0050796~regulation of insulin secretion	28	0.4954	0.0393112	KCNC2, SLC2A1, ICA1, ITPR1, ITPR2, ITPR3, CACNA1C, TNF, PPP3CB, CCL5, HNF4A, TFAP2B, CPT1A, KCNJ11, UQCC2, ABCC8, CACNA2D2, SYT9, ADRA2A, PER2, IFNG, KCNS3, LEP, GNAS, SLC25A5, STX1A, RAPGEF3, RAPGEF4	4969	67	16792	1.41227	1	1	0.994256
GOTERM_BP_DIRECT	GO:0042110~T cell activation	21	0.37155	0.0397594	CD86, ITK, CD80, CD3G, SLA2, CD3E, DDOST, HSPD1, CD2, ZAP70, PPP3CB, CD8A, CD7, KIF13B, NCK2, AZI2, ADA, ICOSLG, NCK1, CD276, IFNAR1	4969	47	16792	1.50992	1	1	0.994256
GOTERM_BP_DIRECT	GO:0045600~positive regulation of fat cell differentiation	21	0.37155	0.0397594	XBP1, CEBPB, ZBTB16, DKKL1, ADIRF, STK4, STK3, ZFP36L1, ZFP36, SFRP2, FRZB, CARM1, NOCT, SNAI2, PPARG, CCDC3, ZNF385A, TRPM4, CMKLR1, PPARD, ZBTB7C	4969	47	16792	1.50992	1	1	0.994256
GOTERM_BP_DIRECT	GO:0009267~cellular response to starvation	21	0.37155	0.0397594	SREBF1, CADPS2, RALB, BMPR2, SRD5A1, EHMT2, CAV1, AKR1C3, CTSV, ATG14, ZFYVE1, SIRT1, FBXO22, RRAGD, ALB, PDK4, FNIP1, GAS6, GLUL, DSC2, FADS1	4969	47	16792	1.50992	1	1	0.994256
GOTERM_BP_DIRECT	GO:0030878~thyroid gland development	13	0.230007	0.039856	TBX1, MAP2K1, THRA, SIX1, BRAF, HHEX, HOXB3, MAPK1, RAF1, NKX2-5, HOXA5, FGF10, MAPK3	4969	25	16792	1.75726	1	1	0.994256
GOTERM_BP_DIRECT	GO:0030855~epithelial cell differentiation	29	0.513093	0.0400065	TAGLN, ACADVL, PCNA, SIX1, DNPH1, CNN3, MUC1, PGK1, ANXA7, FZD1, TBX1, GSTK1, CBR1, CPT1A, BMP7, ACTL8, VEGFA, NR5A2, COL4A1, TOLLIP, KRT14, CDK1, ID3, TAGLN2, PPARG, ALDOC, VDAC1, RHCG, CES1	4969	70	16792	1.40002	1	1	0.994256
GOTERM_BP_DIRECT	GO:0016236~macroautophagy	31	0.548478	0.041149	BECN1, TOMM40, MTMR14, ZFYVE1, GABARAP, TOMM22, RPTOR, MAP1LC3A, ATG101, UBC, UBQLN1, MFN1, TOMM70, GABARAPL2, MTERF3, ATG14, PRKAB1, DYNLL2, RRAGA, PINK1, RRAGC, RRAGB, RHEB, RRAGD, NBR1, TOMM7, VDAC1, LAMTOR4, LAMTOR3, TOMM5, TOMM6	4969	76	16792	1.37842	1	1	0.994256
GOTERM_BP_DIRECT	GO:0019985~translesion synthesis	17	0.300778	0.0415627	RFC5, VCP, RFC3, RFC4, PCNA, POLN, USP10, RFC2, REV1, ISG15, PRIMPOL, POLD3, POLD1, POLD2, UBC, SPRTN, DTL	4969	36	16792	1.59581	1	1	0.994256
GOTERM_BP_DIRECT	GO:0042769~DNA damage response, detection of DNA damage	17	0.300778	0.0415627	RFC5, MRPS26, RFC3, RFC4, PCNA, UBE2B, RFC2, ZBTB32, DNAJA1, POLD3, MRPS9, POLD1, POLD2, UBC, USP1, DTL, SOX4	4969	36	16792	1.59581	1	1	0.994256
GOTERM_BP_DIRECT	GO:0001934~positive regulation of protein phosphorylation	48	0.849257	0.0427865	CD40, RALB, PELI2, OPRL1, CIB1, ARRB1, PRR5L, STK4, TNF, C3, MYDGF, EDNRB, CCND2, THPO, CHEK2, GPER1, NPTN, DVL3, FNIP1, HRAS, PDE8A, MAPK3, FZD1, TBX1, NTRK2, XBP1, SEMA4D, ANXA2, ODAM, PLAUR, IGF2, CSNK1D, AXIN2, ATG14, MMP9, SIRT1, PTK2, VEGFA, BMP4, CLIP3, DAB2, ADAM17, RAP2A, PINK1, KRAS, TEK, GAS6, ENG	4969	127	16792	1.27724	1	1	0.994256
GOTERM_BP_DIRECT	GO:0042384~cilium assembly	47	0.831564	0.0429324	ONECUT2, INTU, SNX10, CELSR3, RPGR, PKHD1, DYNC2LI1, IFT74, ABLIM1, PCM1, ABLIM3, STK36, FLNA, NEK1, BBS9, PCNT, CC2D2A, BBS5, ATP6V1D, BBS4, RAB8A, BBS2, DYNC2H1, IQCB1, BBS1, ACTR2, IFT140, WDR19, SCLT1, KIF24, WDR35, IFT20, EHD1, AHI1, TTC8, TTC30B, TMEM138, TMEM237, NME8, TTC30A, ATXN10, RAB17, IFT46, CLUAP1, CFAP53, CCNO, CEP89	4969	124	16792	1.28088	1	1	0.994256
GOTERM_BP_DIRECT	GO:0031175~neuron projection development	39	0.690021	0.043259	RB1, APP, UCN, NLGN1, BTG2, DOCK7, PTPRM, FRY, PQBP1, HERC1, FLRT3, MAP2, GALR2, ALKBH1, MICALL1, STMN1, WDR5, RAC3, NRTN, PHGDH, STX3, ARFGEF1, LYN, UNC5A, PRMT1, DTNBP1, POU4F1, RAB11A, MANF, EHD1, VAPA, CDK5, GPRIN1, RAB35, CNTN1, CNTN4, ATXN10, CDK16, CDK5R1	4969	100	16792	1.31795	1	1	0.994256
GOTERM_BP_DIRECT	GO:0014911~positive regulation of smooth muscle cell migration	11	0.194621	0.0437445	PDGFRB, NRP1, POSTN, P2RY6, SRC, CCL5, MYC, SEMA6D, BCL2, IGF1, FOXO4	4969	20	16792	1.85864	1	1	0.994256
GOTERM_BP_DIRECT	GO:0016049~cell growth	24	0.424628	0.043839	XBP1, NDRG4, NOP58, TGFB3, ENTPD5, EMP1, NDNF, SLC3A2, CEL, TYMS, ATAD3A, NUBP1, SLC9A1, TGFBR3, RPTOR, ENOX2, SEC61A1, AR, RRAGC, TNN, BCL2, ITGAV, SOCS5, PAK4	4969	56	16792	1.44829	1	1	0.994256
GOTERM_BP_DIRECT	GO:0007173~epidermal growth factor receptor signaling pathway	24	0.424628	0.043839	PIGR, GRB7, CAMLG, SRC, TGFA, PIK3R1, PTK2, ADAM17, NRAS, RPS6KA5, EFEMP1, FES, KIF16B, NCK2, CSK, GRB2, KRAS, PLCG1, SOS1, HRAS, EPS15, FAM83B, SOCS5, FAM83A	4969	56	16792	1.44829	1	1	0.994256
GOTERM_BP_DIRECT	GO:0045668~negative regulation of osteoblast differentiation	18	0.318471	0.0440152	GDF10, NOTCH1, SEMA4D, CITED1, CHRD, TWIST2, RORB, AXIN2, TNF, SKI, TWSG1, NOCT, ID1, NBR1, ID3, HOXA2, TRPM4, MEN1	4969	39	16792	1.5597	1	1	0.994256
GOTERM_BP_DIRECT	GO:0006605~protein targeting	18	0.318471	0.0440152	NLGN1, KATNB1, TRAK1, YWHAZ, SORL1, GABARAP, TRAK2, AKAP12, SYNGR1, MYO1C, PAN3, OS9, YWHAQ, GIPC1, SEC61G, KIF13B, HOMER3, YWHAG	4969	39	16792	1.5597	1	1	0.994256
GOTERM_BP_DIRECT	GO:0045931~positive regulation of mitotic cell cycle	14	0.2477	0.0440712	FOXA1, STAT5B, APP, DUSP3, SPHK1, USP22, ASNS, CDC25B, CCNB1, CDK1, EIF4EBP1, BIRC5, FGF10, PAFAH1B1	4969	28	16792	1.68968	1	1	0.994256
GOTERM_BP_DIRECT	GO:0045080~positive regulation of chemokine biosynthetic process	7	0.12385	0.0443218	EGR1, IFNG, WNT5A, HMOX1, TNF, MYD88, TLR3	4969	10	16792	2.36555	1	1	0.994256
GOTERM_BP_DIRECT	GO:0016572~histone phosphorylation	7	0.12385	0.0443218	RPS6KA4, RPS6KA5, CDK2, CDK1, BAZ1B, NEK11, MAP3K12	4969	10	16792	2.36555	1	1	0.994256
GOTERM_BP_DIRECT	GO:0031115~negative regulation of microtubule polymerization	7	0.12385	0.0443218	CLIP3, STMN1, STMN2, INPP5J, TBCD, MAPRE1, SNCA	4969	10	16792	2.36555	1	1	0.994256
GOTERM_BP_DIRECT	GO:1902237~positive regulation of endoplasmic reticulum stress-induced intrinsic apoptotic signaling pathway	7	0.12385	0.0443218	BCL2L11, DDIT3, NCK2, SERINC3, SIRT1, PTPN2, NCK1	4969	10	16792	2.36555	1	1	0.994256
GOTERM_BP_DIRECT	GO:0034501~protein localization to kinetochore	7	0.12385	0.0443218	MTBP, ZW10, CDK1, TTK, KNL1, SPDL1, AURKB	4969	10	16792	2.36555	1	1	0.994256
GOTERM_BP_DIRECT	GO:0000290~deadenylation-dependent decapping of nuclear-transcribed mRNA	7	0.12385	0.0443218	PAN3, NOCT, LSM1, DCPS, PATL1, DCP1B, PATL2	4969	10	16792	2.36555	1	1	0.994256
GOTERM_BP_DIRECT	GO:0016559~peroxisome fission	7	0.12385	0.0443218	FIS1, ACOT8, ACOX1, PEX11A, PEX11B, PEX11G, DNM1L	4969	10	16792	2.36555	1	1	0.994256
GOTERM_BP_DIRECT	GO:0051272~positive regulation of cellular component movement	7	0.12385	0.0443218	LYN, ADAM17, BCL6, RPS19, STMN1, ACTN4, VEGFA	4969	10	16792	2.36555	1	1	0.994256
GOTERM_BP_DIRECT	GO:0043406~positive regulation of MAP kinase activity	25	0.442321	0.0448918	CD40, FLT3, SRC, HTR2B, FGF1, FGF2, TNF, IRAK1, PDCD10, PDGFD, PDGFC, CSK, HRAS, ELANE, PDGFRB, MEF2C, MIF, ADRA2A, VEGFA, FGF18, NEK10, KRAS, PDE5A, CD24, EZH2	4969	59	16792	1.43193	1	1	0.994256
GOTERM_BP_DIRECT	GO:0009612~response to mechanical stimulus	25	0.442321	0.0448918	BTG2, DNAH1, CITED2, SRC, GLI2, CCNB1, PIEZO2, JUNB, PSPH, POSTN, JUN, STAT1, ANKRD23, ASNS, MEIS2, DCN, TGFBR2, FOSL1, CLCN6, COL3A1, CXCL12, TXNIP, FOSB, PPARG, LRP11	4969	59	16792	1.43193	1	1	0.994256
GOTERM_BP_DIRECT	GO:0009411~response to UV	19	0.336164	0.0461721	CDKN2D, RPAIN, BRSK1, TIPIN, UBE2B, CIRBP, REV1, UBE2A, PRIMPOL, MSH6, ERCC3, POLD1, USP1, SPRTN, ERCC5, MAP2K7, DTL, ELANE, MEN1	4969	42	16792	1.52875	1	1	0.994256
GOTERM_BP_DIRECT	GO:0007076~mitotic chromosome condensation	9	0.159236	0.0462001	CHMP1A, NUSAP1, AKAP8, NCAPG, NCAPD2, NCAPD3, SMC4, PAM, SMC2	4969	15	16792	2.02761	1	1	0.994256
GOTERM_BP_DIRECT	GO:0046037~GMP metabolic process	9	0.159236	0.0462001	DLG2, GUK1, DLG4, MAGI3, GMPR2, CASK, PDE6B, CARD11, TJP2	4969	15	16792	2.02761	1	1	0.994256
GOTERM_BP_DIRECT	GO:0007095~mitotic G2 DNA damage checkpoint	9	0.159236	0.0462001	MUS81, CCNA2, FANCI, BLM, SYF2, CDK1, TOPBP1, FOXO4, CDK5RAP3	4969	15	16792	2.02761	1	1	0.994256
GOTERM_BP_DIRECT	GO:0043627~response to estrogen	27	0.477707	0.0466183	DTYMK, CITED1, CITED2, ARPC1B, TNFRSF11B, GATA3, BRCA1, GLI3, HSPD1, CYP27B1, LDHA, CTNNA1, HMOX1, MAPK1, PDGFRB, HSP90AA1, TGFB3, SRD5A1, CAV1, ESR1, TGFBR2, F7, GAL, PPARG, CRIPAK, TEK, CD24	4969	65	16792	1.40373	1	1	0.994256
GOTERM_BP_DIRECT	GO:0032781~positive regulation of ATPase activity	15	0.265393	0.0477368	GABARAPL2, RAB4A, TPM1, AHSA1, ATP1B3, DNAJC24, ATP1B1, TOR1AIP1, TNNT2, DNAJB11, MYL3, DNAJC9, PFN1, PFN2, FGF10	4969	31	16792	1.63517	1	1	0.994256
GOTERM_BP_DIRECT	GO:0051260~protein homooligomerization	64	1.13234	0.0484486	KCNG1, KCNG3, KCNC2, PRF1, IDE, SLC6A4, DPYSL3, LONP1, IKBKE, GLUL, TGM2, CPT1A, VWF, RIPK3, KCND2, KCTD1, KCTD3, KCTD6, CLDN3, CLPP, TRIM13, CHMP4B, KCTD12, KCTD18, KCTD15, COLEC12, NLGN1, VCP, ATL3, ATL1, PEX11B, ATL2, SLC1A1, DERL1, ITPR3, ACAT1, SCUBE1, SPAST, SHARPIN, RNF213, KCTD21, NACC1, HSF1, HMOX1, STOM, ECT2, BID, SPAG9, FIS1, POLQ, GCH1, CAV1, TOR1B, SOD2, EHD1, RAD51, P2RX4, KCNS3, S…	4969	177	16792	1.22191	1	1	0.994256
GOTERM_BP_DIRECT	GO:0001836~release of cytochrome c from mitochondria	12	0.212314	0.049611	GGCT, FIS1, JUN, BCL2, FZD9, IFI6, BAX, SFN, BAK1, SOD2, DNM1L, BID	4969	23	16792	1.76314	1	1	0.994256
GOTERM_BP_DIRECT	GO:0050919~negative chemotaxis	16	0.283086	0.0509154	SEMA5A, SEMA7A, SEMA6A, SEMA4D, SEMA3C, SEMA6D, SEMA3B, SEMA4C, SEMA3G, SEMA3E, FLRT2, FLRT3, ITGAV, SLIT3, SLIT2, PLXNA3	4969	34	16792	1.59028	1	1	0.994256
GOTERM_BP_DIRECT	GO:0000165~MAPK cascade	91	1.61005	0.0524423	CSF2, IRS1, WDR83, IRS2, FGF1, FGF2, TNF, PSMD8, ZFP36, PSMD7, MYC, PSMD2, PSMD3, PSMD1, NRTN, SPTAN1, HRAS, JAK1, MEN1, PDGFRB, MAP2K3, MEF2A, MAP2K1, MEF2C, MAP2K2, PAQR3, FRS2, GFRA1, GFRA3, DUSP6, PSMA5, PSMA6, PSMA3, PSMA4, RASA1, PSME4, PSME2, MAPKAPK5, RAF1, SOS1, SCG2, CAMK2B, SPTBN4, SHC2, PSMD12, PSMD11, PSMD14, PSMD13, RASAL1, IL2RG, PSMA7, PSMB10, ZFP36L1, PSMB6, PSMB7, NRAS, PSMB4, P…	4969	262	16792	1.17374	1	1	0.994256
GOTERM_BP_DIRECT	GO:0070301~cellular response to hydrogen peroxide	24	0.424628	0.0534954	CBX8, HDAC2, PCNA, PCGF2, TNFAIP3, PARK7, KLF4, SIRT1, KLF2, RHOB, AQP1, IL18BP, CST3, TRPM2, IL18RAP, AIFM1, PDGFD, HSF1, CDK1, PPIF, LCN2, STAT6, ECT2, EZH2	4969	57	16792	1.42289	1	1	0.994256
GOTERM_BP_DIRECT	GO:0042102~positive regulation of T cell proliferation	25	0.442321	0.0544248	SASH3, TFRC, TNFRSF13C, CD3E, CORO1A, TNFSF13B, PNP, CCL5, NCK2, HES1, NCKAP1L, NCK1, CD276, CARMIL2, BTNL2, CD4, IFNG, CD6, IL23A, DNAJA3, LEP, PRKCQ, CD46, IL6ST, CARD11	4969	60	16792	1.40806	1	1	0.994256
GOTERM_BP_DIRECT	GO:0051289~protein homotetramerization	25	0.442321	0.0544248	CDA, SHMT2, IDE, ACACB, CRYZ, SRR, RXRA, PPAT, PCBD1, TK1, DNM1L, CBR4, TP63, VASP, GBP5, GPX3, ACOT13, SOD2, GNMT, PFKL, IMPDH2, CAT, EVL, HPRT1, FBP1	4969	60	16792	1.40806	1	1	0.994256
GOTERM_BP_DIRECT	GO:0043433~negative regulation of sequence-specific DNA binding transcription factor activity	25	0.442321	0.0544248	RB1, HDAC2, KDM1A, CEBPG, FOXS1, PIM1, FLNA, HMOX1, BTRC, TNFRSF4, MEN1, EGLN1, WFS1, ESR1, SIRT1, PIAS2, MAD2L2, SFRP4, DDIT3, ID1, PLA2G10, BHLHE40, ID3, GAS6, EZH2	4969	60	16792	1.40806	1	1	0.994256
GOTERM_BP_DIRECT	GO:0048843~negative regulation of axon extension involved in axon guidance	13	0.230007	0.0545992	SEMA5A, NRP1, SEMA7A, SEMA6A, SEMA4D, SEMA3C, SEMA6D, WNT5A, SEMA3B, SEMA4C, SEMA3G, SEMA3E, PLXNA3	4969	26	16792	1.68968	1	1	0.994256
GOTERM_BP_DIRECT	GO:0002053~positive regulation of mesenchymal cell proliferation	13	0.230007	0.0545992	FBXW4, TBX1, PRRX1, STAT1, WNT5A, CHRD, IRS2, TGFBR2, FOXP1, VEGFA, MYCN, MYC, TP63	4969	26	16792	1.68968	1	1	0.994256
GOTERM_BP_DIRECT	GO:2000774~positive regulation of cellular senescence	6	0.106157	0.0547604	CDKN2A, HMGA1, KRAS, EEF1E1, SIRT1, YPEL3	4969	8	16792	2.53451	1	1	0.994256
GOTERM_BP_DIRECT	GO:0000076~DNA replication checkpoint	6	0.106157	0.0547604	TIPIN, CDC45, RAD17, DNA2, CDC6, RAD9A	4969	8	16792	2.53451	1	1	0.994256
GOTERM_BP_DIRECT	GO:0061384~heart trabecula morphogenesis	6	0.106157	0.0547604	TGFBR3, NOTCH1, NACA, S1PR1, SOS1, BMP7	4969	8	16792	2.53451	1	1	0.994256
GOTERM_BP_DIRECT	GO:0072091~regulation of stem cell proliferation	6	0.106157	0.0547604	YAP1, SOX17, AGO3, SOX18, HMGB2, ZFP36L1	4969	8	16792	2.53451	1	1	0.994256
GOTERM_BP_DIRECT	GO:0006108~malate metabolic process	6	0.106157	0.0547604	MDH1, MDH2, ME1, ME3, ME2, MDH1B	4969	8	16792	2.53451	1	1	0.994256
GOTERM_BP_DIRECT	GO:0000288~nuclear-transcribed mRNA catabolic process, deadenylation-dependent decay	6	0.106157	0.0547604	ZFP36, CNOT3, POLR2D, DCPS, ZFP36L2, ZFP36L1	4969	8	16792	2.53451	1	1	0.994256
GOTERM_BP_DIRECT	GO:0098789~pre-mRNA cleavage required for polyadenylation	6	0.106157	0.0547604	CPSF4, CPSF1, NCBP1, NCBP2, CSTF2, CSTF2T	4969	8	16792	2.53451	1	1	0.994256
GOTERM_BP_DIRECT	GO:1904706~negative regulation of vascular smooth muscle cell proliferation	6	0.106157	0.0547604	CNN1, CDKN1B, TGFB3, GPER1, TPM1, HMOX1	4969	8	16792	2.53451	1	1	0.994256
GOTERM_BP_DIRECT	GO:0032872~regulation of stress-activated MAPK cascade	6	0.106157	0.0547604	MAP2K1, MAP2K2, PRDX1, NBR1, MAPK1, MAPK3	4969	8	16792	2.53451	1	1	0.994256
GOTERM_BP_DIRECT	GO:0045056~transcytosis	6	0.106157	0.0547604	SRC, MAL2, VPS35, RAB17, GPIHBP1, MFSD2A	4969	8	16792	2.53451	1	1	0.994256
GOTERM_BP_DIRECT	GO:0033539~fatty acid beta-oxidation using acyl-CoA dehydrogenase	10	0.176929	0.0548235	ACAD8, ACADVL, ACOX2, ACOX1, IVD, ACAD9, ETFDH, ACADM, ACAD11, ACADSB	4969	18	16792	1.87742	1	1	0.994256
GOTERM_BP_DIRECT	GO:0045807~positive regulation of endocytosis	10	0.176929	0.0548235	CLIP3, DAB2, ARF1, WNT5A, GPC3, NEDD4L, CBLL1, DLL1, TSPAN1, SNCA	4969	18	16792	1.87742	1	1	0.994256
GOTERM_BP_DIRECT	GO:0042267~natural killer cell mediated cytotoxicity	10	0.176929	0.0548235	RAET1G, PRDX1, TUBB, CEBPG, RAET1L, GZMB, SLAMF7, TUBB4B, LYST, MICA	4969	18	16792	1.87742	1	1	0.994256
GOTERM_BP_DIRECT	GO:0045089~positive regulation of innate immune response	10	0.176929	0.0548235	GBP5, PLSCR1, CCL5, POLR3D, MMP2, CARD9, HMGB2, POLR3G, TLR8, COCH	4969	18	16792	1.87742	1	1	0.994256
GOTERM_BP_DIRECT	GO:0008284~positive regulation of cell proliferation	155	2.74239	0.0548831	CD86, VIPR1, CSF2, IRS1, ROGDI, SIRPG, CIB1, IRS2, FGF1, FGF2, CRKL, IGF1R, CDC20, EDNRB, CCND2, MYC, NUDT16, CAPN1, SOX4, KRT6A, PDGFRB, RPS9, TIPIN, CSNK2A1, CLEC11A, CEP131, SOX11, LIFR, NCCRP1, CDC25B, WDR77, AR, ADAM17, SFRP2, STAMBP, IL6ST, TSPYL5, NOTCH1, SHMT2, NOP2, TGFA, PRDX3, PKHD1, GRK5, PDCD10, PDGFD, NACC1, PDGFC, S100A13, NKX2-5, TRPM4, SLAMF1, SRPK2, LYN, CBX8, AKIRIN2, TFAP2B, X…	4969	466	16792	1.12403	1	1	0.994256
GOTERM_BP_DIRECT	GO:0035690~cellular response to drug	28	0.4954	0.0564445	DDC, HSP90AB1, TFRC, EHMT2, EFTUD2, MT2A, PPP3CB, CHEK2, MYC, PPAT, CCL4, PDE4A, KCNH2, PPP1R14A, RANBP1, MEF2C, PDE2A, CAD, BRAF, NME1, QDPR, RAP2A, AIM2, TH, GAS6, FBP1, TLR3, RBM22	4969	69	16792	1.37133	1	1	0.994256
GOTERM_BP_DIRECT	GO:0006888~ER to Golgi vesicle-mediated transport	58	1.02619	0.0571635	PROS1, CTSZ, SPTAN1, CTSC, DYNC2H1, RAB2A, TMED9, COG7, COG4, COG2, COPZ2, ANK2, DYNLL2, NRBP1, COPZ1, ARFGAP1, F5, F7, F8, GORASP1, ZW10, RAB35, PREB, MPPE1, GAS6, SEC22A, ERGIC1, SEC22C, DCTN6, SPTBN4, DYNC1I2, VCP, TMED10, LMAN2L, ATL3, STX17, DCTN4, GOSR2, ATL2, TGFA, DYNC2LI1, SPAST, SPTBN1, SPTBN2, BCAP31, F10, TRAPPC4, DDHD2, YIF1A, YIF1B, SEC23IP, VAPA, TMEM115, HYOU1, COPG1, CNIH2, CNIH4…	4969	160	16792	1.22502	1	1	0.994256
GOTERM_BP_DIRECT	GO:0007623~circadian rhythm	30	0.530786	0.0572709	GSK3B, DDC, RORC, ADCY1, TYMS, NPAS2, SLC6A4, HEBP1, DBP, NFIL3, NOCT, NRIP1, SREBF1, NTRK2, JUN, CPT1A, EGR3, NONO, PER2, F7, NCOR1, CDK4, LEP, CRY2, ID1, KLF9, TIMELESS, ID3, TOP1, ATF5	4969	75	16792	1.35174	1	1	0.994256
GOTERM_BP_DIRECT	GO:1902166~negative regulation of intrinsic apoptotic signaling pathway in response to DNA damage by p53 class mediator	8	0.141543	0.058134	BCL2L12, MUC1, KDM1A, MIF, TRIAP1, SIRT1, ZNF385A, ELL3	4969	13	16792	2.0796	1	1	0.994256
GOTERM_BP_DIRECT	GO:0045995~regulation of embryonic development	8	0.141543	0.058134	SOX17, LAMA2, LAMA4, NOCT, LAMA3, CDK1, PHLDA2, CCSAP	4969	13	16792	2.0796	1	1	0.994256
GOTERM_BP_DIRECT	GO:0050730~regulation of peptidyl-tyrosine phosphorylation	8	0.141543	0.058134	EFNA1, PDCL3, PDGFD, PRKCE, PDGFC, ITGB2, PPP2R5B, IFNAR1	4969	13	16792	2.0796	1	1	0.994256
GOTERM_BP_DIRECT	GO:2000273~positive regulation of receptor activity	8	0.141543	0.058134	CDK5, ANXA2, PRKCE, IGF2, SRA1, BAZ1B, MED16, PPARGC1B	4969	13	16792	2.0796	1	1	0.994256
GOTERM_BP_DIRECT	GO:0035909~aorta morphogenesis	8	0.141543	0.058134	TBX1, PDGFRB, TFAP2B, JAG1, LRP1, CHD7, SIX1, TBX2	4969	13	16792	2.0796	1	1	0.994256
GOTERM_BP_DIRECT	GO:0050434~positive regulation of viral transcription	14	0.2477	0.0588309	NOTCH1, CTDP1, GTF2B, SUPT5H, POLR2A, POLR2D, POLR2F, POLR2G, NELFCD, POLR2H, PFN1, POLR2J, NELFE, POLR2L	4969	29	16792	1.63141	1	1	0.994256
GOTERM_BP_DIRECT	GO:0097150~neuronal stem cell population maintenance	11	0.194621	0.0619313	ASPM, PCM1, NOTCH1, JAG1, PRRX1, CDH2, FANCD2, SRRT, HES1, DLL1, MCPH1	4969	21	16792	1.77014	1	1	0.994256
GOTERM_BP_DIRECT	GO:0071480~cellular response to gamma radiation	11	0.194621	0.0619313	YAP1, EGR1, XRCC6, RAD51, KDM1A, CHEK2, TLK2, CYBA, ELK1, GTF2H5, TSPYL5	4969	21	16792	1.77014	1	1	0.994256
GOTERM_BP_DIRECT	GO:0007259~JAK-STAT cascade	15	0.265393	0.0624151	STAT5A, IFNAR2, IL15RA, STAT5B, STAT1, CTR9, STAT3, PKD2, PIAS1, SOCS2, SOCS1, IFNL1, STAMBP, SOCS5, IFNAR1	4969	32	16792	1.58407	1	1	0.994256
GOTERM_BP_DIRECT	GO:0045595~regulation of cell differentiation	15	0.265393	0.0624151	TFAP2B, PLEKHB1, LTBP4, HMGB2, KLF4, RUNX3, PTBP3, PPP2CA, EID1, FES, SPOCK2, STK26, SPRY2, RAF1, FADS1	4969	32	16792	1.58407	1	1	0.994256
GOTERM_BP_DIRECT	GO:0007093~mitotic cell cycle checkpoint	15	0.265393	0.0624151	RB1, ZWILCH, PLK2, PRCC, TTK, ZWINT, CHFR, ZW10, CHEK1, RAD17, KNTC1, HRAS, BUB1, MAD1L1, MAD2L1	4969	32	16792	1.58407	1	1	0.994256
GOTERM_BP_DIRECT	GO:0090502~RNA phosphodiester bond hydrolysis, endonucleolytic	23	0.406936	0.0636773	TSEN34, CPSF4, FEN1, RNASEH2A, POP7, RNASEK, POP1, ZC3H3, CPSF3, RPP40, DICER1, TSEN54, MRPL44, RIDA, RNASEH1, NOB1, EXO1, LACTB2, AGO2, RPP21, DROSHA, RPP25, RPP38	4969	55	16792	1.41318	1	1	0.994256
GOTERM_BP_DIRECT	GO:0030308~negative regulation of cell growth	45	0.796178	0.0637937	CDA, CDKN1B, BMPR2, DCUN1D3, FHL1, JADE1, ENO1, ACVR1B, RERG, CDKN2AIP, PPP2CA, TRO, CYP27B1, GJA1, SERTAD3, WNT11, SOX17, SERTAD1, GNG4, FRZB, HNF4A, DACT3, SH3BP4, SLIT3, SLIT2, IP6K2, CDKN2D, CDKN2C, CDKN2A, TNK1, EAF2, SMARCA2, SIRT1, SMARCA4, DCSTAMP, SFRP2, PSRC1, BCL6, BCL2, NDUFS3, SCGB3A1, PPARG, CRLF3, FBP1, PPARD	4969	121	16792	1.25678	1	1	0.994256
GOTERM_BP_DIRECT	GO:0017148~negative regulation of translation	24	0.424628	0.0645746	GRB7, BTG2, DAPK1, IREB2, EIF4A3, CIRBP, SAMD4A, EIF2AK2, SAMD4B, TSC1, PATL2, PURA, SYNCRIP, RIDA, CNOT1, CNOT3, IGF2BP3, ANG, CALR, IGF2BP2, CPEB3, EIF4E2, CNOT9, GAPDH	4969	58	16792	1.39835	1	1	0.994256
GOTERM_BP_DIRECT	GO:0001947~heart looping	25	0.442321	0.0653159	NDRG4, NOTCH1, CITED2, CCDC103, PKD2, DLL1, GJA1, SOX17, SOX18, NPHP3, NKX2-5, BBS5, BBS4, STIL, MEF2C, DNAAF1, SETDB2, WNT5A, TBX3, TGFBR2, TBX2, OVOL2, AHI1, CLUAP1, ENG	4969	61	16792	1.38498	1	1	0.994256
GOTERM_BP_DIRECT	GO:0050918~positive chemotaxis	16	0.283086	0.0654462	SEMA5A, NRP1, HMGB2, SCRIB, MIF, FGF2, CORO1A, VEGFA, BMP4, CXCL12, ALKBH1, CCL5, NTF3, PLXNB3, SCG2, FGF10	4969	35	16792	1.54485	1	1	0.994256
GOTERM_BP_DIRECT	GO:0030501~positive regulation of bone mineralization	16	0.283086	0.0654462	FBN2, ACVR1, MEF2C, BMPR2, TGFB3, OSR1, FZD9, ISG15, ANO6, ADRB2, ATRAID, BMP7, BMP4, TMEM119, BMPR1B, CD276	4969	35	16792	1.54485	1	1	0.994256
GOTERM_BP_DIRECT	GO:0006468~protein phosphorylation	151	2.67162	0.0655725	APP, CCNH, MYLK, RPS6KA4, STK10, LIPE, RPS6KA5, CHEK2, CDK20, PDK4, PIM1, NEK1, NEK2, PIM2, PDK2, ACVR1, CDKL3, PRKCI, CSNK2A1, DAPK1, PRKCE, CSNK2A2, LMTK2, CASK, VRK1, PHKA1, CSNK1D, PRPF4B, PASK, RUNX3, PRKAB1, NRBP1, CDC25B, BCR, PRKAR1B, CCNE1, CSNK2B, SIK3, BTK, TRIB3, PRKD1, RAF1, BRSK1, PXK, NPR2, NPRL2, STK39, WNK4, PIK3R1, PKMYT1, STK4, STK3, NUAK1, IRAK1, STK35, STK36, GRK4, GRK6, STK3…	4969	456	16792	1.11904	1	1	0.994256
GOTERM_BP_DIRECT	GO:0006006~glucose metabolic process	27	0.477707	0.0663973	H6PD, ADPGK, IRS2, OMA1, PDHB, TNF, MYC, PDK4, PDK3, APOD, PGM5, SLC37A4, PDK2, TFAP2B, CPT1A, G6PD, PDHA1, KCNJ11, IGF2, NISCH, OAS1, GNPDA2, FABP5, LEP, GAPDH, FBN1, PPARD	4969	67	16792	1.36183	1	1	0.994256
GOTERM_BP_DIRECT	GO:0006952~defense response	27	0.477707	0.0663973	COLEC12, CD84, CXCL9, SP140, GATA3, NOD2, LILRA2, LILRA3, CST3, CLEC1A, HSF1, NLRP3, KCNN4, TPSAB1, ICOSLG, IL32, CAMLG, MX2, MX1, HLA-B, TAP1, LILRB3, MLF2, CXCL12, TFF3, PTPRCAP, ACKR1	4969	67	16792	1.36183	1	1	0.994256
GOTERM_BP_DIRECT	GO:0046134~pyrimidine nucleoside biosynthetic process	5	0.0884643	0.0671935	DCTD, DUT, CAD, TYMS, DHODH	4969	6	16792	2.81613	1	1	0.994256
GOTERM_BP_DIRECT	GO:0042045~epithelial fluid transport	5	0.0884643	0.0671935	AHCYL1, EDNRB, CSF2, ITPR1, SLC26A6	4969	6	16792	2.81613	1	1	0.994256
GOTERM_BP_DIRECT	GO:0006189~'de novo' IMP biosynthetic process	5	0.0884643	0.0671935	ADSL, ATIC, PPAT, GART, PAICS	4969	6	16792	2.81613	1	1	0.994256
GOTERM_BP_DIRECT	GO:0060440~trachea formation	5	0.0884643	0.0671935	BMP4, MAP2K1, MAPK1, TGFBR2, MAPK3	4969	6	16792	2.81613	1	1	0.994256
GOTERM_BP_DIRECT	GO:0006269~DNA replication, synthesis of RNA primer	5	0.0884643	0.0671935	PRIM2, POLA1, HELB, PRIM1, PRIMPOL	4969	6	16792	2.81613	1	1	0.994256
GOTERM_BP_DIRECT	GO:2001171~positive regulation of ATP biosynthetic process	5	0.0884643	0.0671935	VCP, PINK1, PID1, MYC, STAT3	4969	6	16792	2.81613	1	1	0.994256
GOTERM_BP_DIRECT	GO:0032324~molybdopterin cofactor biosynthetic process	5	0.0884643	0.0671935	MOCS2, NFS1, MOCS3, MOCOS, MOCS1	4969	6	16792	2.81613	1	1	0.994256
GOTERM_BP_DIRECT	GO:0031987~locomotion involved in locomotory behavior	5	0.0884643	0.0671935	PPP3CB, GPR37, FZD4, MYO5A, CLN6	4969	6	16792	2.81613	1	1	0.994256
GOTERM_BP_DIRECT	GO:0035897~proteolysis in other organism	5	0.0884643	0.0671935	MAP2K3, MAP2K4, MAP2K1, MAP2K2, MAP2K7	4969	6	16792	2.81613	1	1	0.994256
GOTERM_BP_DIRECT	GO:0006555~methionine metabolic process	5	0.0884643	0.0671935	MSRA, MTHFD1, SMS, MTHFR, GNMT	4969	6	16792	2.81613	1	1	0.994256
GOTERM_BP_DIRECT	GO:0000710~meiotic mismatch repair	5	0.0884643	0.0671935	MSH6, MSH2, MSH3, ERCC1, MSH5	4969	6	16792	2.81613	1	1	0.994256
GOTERM_BP_DIRECT	GO:0045842~positive regulation of mitotic metaphase/anaphase transition	5	0.0884643	0.0671935	RB1, ESPL1, NSMCE2, DLGAP5, ANAPC11	4969	6	16792	2.81613	1	1	0.994256
GOTERM_BP_DIRECT	GO:0006777~Mo-molybdopterin cofactor biosynthetic process	5	0.0884643	0.0671935	MOCS2, NFS1, MOCS3, MOCOS, MOCS1	4969	6	16792	2.81613	1	1	0.994256
GOTERM_BP_DIRECT	GO:0071353~cellular response to interleukin-4	12	0.212314	0.0677825	DCSTAMP, XBP1, TUBA1B, RPL3, HSP90AB1, HSPA5, NFIL3, IMPDH2, LEF1, GATA3, CORO1A, MCM2	4969	24	16792	1.68968	1	1	0.994256
GOTERM_BP_DIRECT	GO:0030099~myeloid cell differentiation	12	0.212314	0.0677825	CDKN1C, PRDX3, SNRK, CBFB, THPO, BCL6, NCOA6, ZBTB16, PIR, KAT8, PRKX, RUNX1	4969	24	16792	1.68968	1	1	0.994256
GOTERM_BP_DIRECT	GO:0030511~positive regulation of transforming growth factor beta receptor signaling pathway	12	0.212314	0.0677825	CDKN1C, TGFBR3, DAB2, ADAM17, HSP90AB1, CITED1, CITED2, TGFB1I1, GIPC1, ITGA8, NPNT, MEN1	4969	24	16792	1.68968	1	1	0.994256
GOTERM_BP_DIRECT	GO:0007422~peripheral nervous system development	12	0.212314	0.0677825	ALDH3A2, UGT8, NFASC, EDNRB, EGR3, ADGRB2, ERBB3, CITED2, OSM, PMP22, SERPINI1, GFRA3	4969	24	16792	1.68968	1	1	0.994256
GOTERM_BP_DIRECT	GO:2001234~negative regulation of apoptotic signaling pathway	9	0.159236	0.069009	NR4A2, IGBP1, MNT, PCGF2, BCL2, BAX, TMBIM6, FAIM2, MEIS3	4969	16	16792	1.90089	1	1	0.994256
GOTERM_BP_DIRECT	GO:0051895~negative regulation of focal adhesion assembly	9	0.159236	0.069009	DMTN, SRC, RCC2, DLC1, PTEN, APOD, PHLDB2, CLASP2, CORO1C	4969	16	16792	1.90089	1	1	0.994256
GOTERM_BP_DIRECT	GO:0007158~neuron cell-cell adhesion	9	0.159236	0.069009	NLGN1, NLGN2, NLGN4X, NRXN2, CEL, CNTN4, NCAM2, CDK5R1, ASTN1	4969	16	16792	1.90089	1	1	0.994256
GOTERM_BP_DIRECT	GO:0060216~definitive hemopoiesis	9	0.159236	0.069009	TGFBR3, MFAP5, MEIS1, CBFB, HOXB4, HOXB3, ADAR, TEK, ZFP36L2	4969	16	16792	1.90089	1	1	0.994256
GOTERM_BP_DIRECT	GO:0007099~centriole replication	9	0.159236	0.069009	PLK4, CEP135, CEP152, CENPJ, CDK2, SASS6, CEP72, WDR62, CEP63	4969	16	16792	1.90089	1	1	0.994256
GOTERM_BP_DIRECT	GO:0042274~ribosomal small subunit biogenesis	9	0.159236	0.069009	LTV1, EMG1, NOP14, UTP11, RPS19, SURF6, RRP36, NAT10, RPS24	4969	16	16792	1.90089	1	1	0.994256
GOTERM_BP_DIRECT	GO:0032024~positive regulation of insulin secretion	18	0.318471	0.0701553	NLGN2, PRKCE, ABAT, IRS2, MYRIP, GLUD1, TRPM2, GJA1, RBP4, CAPN10, GPER1, NNAT, CD38, GLUL, SOX4, MCU, PCK2, PPARD	4969	41	16792	1.48362	1	1	0.994256
GOTERM_BP_DIRECT	GO:0006635~fatty acid beta-oxidation	19	0.336164	0.0719571	ACADVL, CPT1A, ABCD3, ECI2, HSD17B4, ACAT2, ACAT1, AUH, ACOX2, ACOX1, LEP, ECHDC2, ACADM, ACAD11, HADH, ACAA1, ABCD1, SLC27A2, PPARD	4969	44	16792	1.45927	1	1	0.994256
GOTERM_BP_DIRECT	GO:0032008~positive regulation of TOR signaling	13	0.230007	0.0726001	XBP1, SEH1L, RPTOR, RRAGA, RELN, RRAGC, RRAGB, RHEB, LEP, RRAGD, LAMTOR4, GAS6, LAMTOR3	4969	27	16792	1.6271	1	1	0.994256
GOTERM_BP_DIRECT	GO:0031297~replication fork processing	13	0.230007	0.0726001	MUS81, BLM, PCNA, CENPX, ALYREF, DDX11, ATRX, TONSL, PRIMPOL, CORT, MMS22L, RAD51, EME1	4969	27	16792	1.6271	1	1	0.994256
GOTERM_BP_DIRECT	GO:0006461~protein complex assembly	43	0.760793	0.0732143	CD40, SF3B3, GMNN, SLC2A1, CD3G, CAPG, IL1RAP, CD3E, NAPG, CLGN, CHAF1B, NFS1, CCNB1, CHAF1A, TSPAN4, CAPN3, KNTC1, HES1, NCKAP1L, MDN1, MAPK3, MAGI1, CARD10, CREBBP, DMTN, NIFK, HMGA1, FANCC, TRAF2, MITF, TRAF1, AFG3L2, SLC7A6, SLC7A7, DLG4, ZW10, CDK1, PPIH, NDUFAF1, SSBP3, VAMP2, ATPAF1, VAMP3	4969	116	16792	1.25269	1	1	0.994256
GOTERM_BP_DIRECT	GO:0051292~nuclear pore complex assembly	7	0.12385	0.0735585	NUP93, NDC1, NUP205, NUP107, NUP153, NUP98, TMEM170A	4969	11	16792	2.1505	1	1	0.994256
GOTERM_BP_DIRECT	GO:0060213~positive regulation of nuclear-transcribed mRNA poly(A) tail shortening	7	0.12385	0.0735585	ZFP36, BTG2, CNOT1, AGO2, POLR2G, PABPC1, CPEB3	4969	11	16792	2.1505	1	1	0.994256
GOTERM_BP_DIRECT	GO:1903364~positive regulation of cellular protein catabolic process	7	0.12385	0.0735585	AMER1, UQCC2, VPS11, TNFAIP3, MSN, VPS35, FBXL5	4969	11	16792	2.1505	1	1	0.994256
GOTERM_BP_DIRECT	GO:0033197~response to vitamin E	7	0.12385	0.0735585	BECN1, MEF2C, HMGCS1, LEP, CAT, SRSF2, ADA	4969	11	16792	2.1505	1	1	0.994256
GOTERM_BP_DIRECT	GO:0048703~embryonic viscerocranium morphogenesis	7	0.12385	0.0735585	TBX1, MEF2C, MTHFD1, MTHFD1L, RDH10, LHX1, HOXA2	4969	11	16792	2.1505	1	1	0.994256
GOTERM_BP_DIRECT	GO:0033120~positive regulation of RNA splicing	7	0.12385	0.0735585	POLR2A, U2AF2, SRSF1, SRSF5, PIK3R1, RBM22, ZPR1	4969	11	16792	2.1505	1	1	0.994256
GOTERM_BP_DIRECT	GO:0006098~pentose-phosphate shunt	7	0.12385	0.0735585	RPIA, G6PD, H6PD, TPI1, TALDO1, PGD, TKT	4969	11	16792	2.1505	1	1	0.994256
GOTERM_BP_DIRECT	GO:0030857~negative regulation of epithelial cell differentiation	7	0.12385	0.0735585	YAP1, ZEB1, IFNG, OSR1, CAV1, DLL1, TBX3	4969	11	16792	2.1505	1	1	0.994256
GOTERM_BP_DIRECT	GO:0040008~regulation of growth	22	0.389243	0.0757035	HEPACAM, ACTL6A, OSM, DLL1, TGFBR2, PPP2CA, ENOX2, SOCS1, MRGBP, IFNG, ZMAT3, RUVBL2, RUVBL1, NDN, EPC1, PRAME, BRD8, TKT, GAS6, SOCS7, TSPYL5, SOCS5	4969	53	16792	1.40275	1	1	0.994256
GOTERM_BP_DIRECT	GO:0045727~positive regulation of translation	22	0.389243	0.0757035	UCN, EIF4A3, CIRBP, SAMD4A, UPF3B, RPS27L, LARP4B, PASK, EEF2, RPS4X, PINK1, LARP1, EIF6, CDK4, HNRNPD, MAPK1, PABPC1, CPEB3, SOX4, RBMS3, ABCF1, MAPK3	4969	53	16792	1.40275	1	1	0.994256
GOTERM_BP_DIRECT	GO:0043547~positive regulation of GTPase activity	184	3.25548	0.0759911	CSF2, FAM13B, DENND5B, IRS1, ITSN1, ARHGAP39, IRS2, FGF1, FGF2, RAPGEFL1, RCBTB2, RGS5, PREX1, HERC1, ARHGDIA, ARHGDIB, RCC1, NRTN, ARHGEF40, FBXO8, SBF2, AGFG1, PDGFRB, STARD8, FRS2, BCR, DEPDC1B, ACAP1, ADGRB3, AMPH, RIN3, PKP4, PREB, DENND6B, RIN2, LLGL2, RTN4R, SPTBN4, TBC1D19, SHC2, NPRL2, RASAL1, ARHGAP12, ARHGAP22, ABR, ARHGAP20, RACGAP1, DVL3, NCKAP1L, SRGAP3, SRGAP2, ECT2, TBC1D17, SPTBN…	4969	565	16792	1.10053	1	1	0.994256
GOTERM_BP_DIRECT	GO:0042733~embryonic digit morphogenesis	23	0.406936	0.0765138	FBXW4, CREBBP, HDAC2, INTU, OSR1, ZBTB16, WNT5A, LRP4, TULP3, HOXD13, GRHL2, TBX3, GLI3, GLI2, TBX2, BMP4, GJA1, MYCN, SFRP2, GNAQ, GNA12, FLVCR1, ROR2	4969	56	16792	1.38795	1	1	0.994256
GOTERM_BP_DIRECT	GO:0033574~response to testosterone	14	0.2477	0.0765667	GPI, KCNJ11, DUSP1, CAD, NME1, MTAP, NASP, CDK4, HSF1, TSPO, CA9, AVP, CALR, PSPH	4969	30	16792	1.57703	1	1	0.994256
GOTERM_BP_DIRECT	GO:0009887~organ morphogenesis	35	0.61925	0.0771115	GSK3B, NRP1, ONECUT2, ELN, FHL1, GMNN, BHLHE41, CUL1, HCCS, GATA3, FGF2, CRKL, COMP, LFNG, ABLIM1, PDGFC, ITGAX, SLIT3, E2F4, E2F5, PHLDA2, HRAS, GAMT, SEMA6A, TLE1, SYK, APLP1, BRAF, PALB2, TBX3, DCN, ETV7, TH, LHX1, EVL	4969	92	16792	1.28562	1	1	0.994256
GOTERM_BP_DIRECT	GO:0030097~hemopoiesis	24	0.424628	0.0771498	L3MBTL1, CD164, JAG1, FLT3, TIPARP, ZBTB16, RTKN2, ROGDI, TTC7A, BMI1, SOD2, RUNX3, DLL1, ZFP36L2, RUNX1, TWSG1, EBP, MELK, LCK, MKNK2, PGM3, CIAPIN1, NKX2-5, CD34	4969	59	16792	1.37465	1	1	0.994256
GOTERM_BP_DIRECT	GO:0050767~regulation of neurogenesis	10	0.176929	0.0775751	PER2, YAP1, BCL6, DOCK7, CHD7, HMGB2, HOXB3, POU4F1, DLL1, ASCL2	4969	19	16792	1.77861	1	1	0.994256
GOTERM_BP_DIRECT	GO:0070987~error-free translesion synthesis	10	0.176929	0.0775751	RFC5, VCP, RFC3, RFC4, NPLOC4, PCNA, RFC2, UBC, SPRTN, RCHY1	4969	19	16792	1.77861	1	1	0.994256
GOTERM_BP_DIRECT	GO:0010824~regulation of centrosome duplication	10	0.176929	0.0775751	PKHD1, GEN1, XPO1, CEP131, CHORDC1, XRCC3, CHMP1A, CHMP4C, CHMP2A, CHMP4B	4969	19	16792	1.77861	1	1	0.994256
GOTERM_BP_DIRECT	GO:0006368~transcription elongation from RNA polymerase II promoter	33	0.583864	0.0777544	ENY2, CTDP1, CCNH, GTF2B, GTF2E1, POLR2A, POLR2D, LEO1, POLR2F, POLR2G, NELFCD, POLR2H, POLR2J, NELFE, POLR2L, SUPT16H, NCBP1, NCBP2, TAF13, ADRM1, ELP2, ELP3, SSRP1, SUPT5H, GTF2H4, GTF2H5, ELL3, ERCC3, TAF4B, TAF6, TAF5, TAF4, TAF2	4969	86	16792	1.29673	1	1	0.994256
GOTERM_BP_DIRECT	GO:0014068~positive regulation of phosphatidylinositol 3-kinase signaling	26	0.460014	0.077981	BECN1, FLT3, PRR5L, UBE3A, MYDGF, RELN, ERBB3, CCL5, GPER1, PDGFD, PDGFC, PDGFRB, NTRK2, SEMA4D, IGF1, SIRT1, DCN, PTK2, SELP, LEP, CAT, PLXNB1, TEK, PIK3AP1, RGL2, PPARD	4969	65	16792	1.35174	1	1	0.994256
GOTERM_BP_DIRECT	GO:0006310~DNA recombination	32	0.566171	0.0780016	MUS81, RPAIN, PIF1, BLM, HMGB3, BRCA1, PSMC3IP, RDM1, RECQL4, TFPT, EXO1, RUVBL2, RAD21, RUVBL1, RAD54L, XRCC6, LIG1, NCOA6, ACTR5, NONO, ACTL6A, XRCC3, ATRX, APEX2, ACTR8, UCHL5, SUPV3L1, RAD51, RAD51C, NSMCE4A, ERCC1, RPA4	4969	83	16792	1.30288	1	1	0.994256
GOTERM_BP_DIRECT	GO:0032869~cellular response to insulin stimulus	30	0.530786	0.0783151	C2CD5, IRS1, PRKDC, SRC, IRS2, PIK3R1, SLC9A1, ZFP36L1, MYC, PPAT, YWHAG, RAB8A, XBP1, PRKCI, GOT1, STAT1, SRD5A1, MYO5A, SORBS1, APRT, GCLC, CPEB1, RAB31, CAPN10, PPARG, TRIB3, SRSF5, LPIN1, CPEB2, VAMP2	4969	77	16792	1.31663	1	1	0.994256
GOTERM_BP_DIRECT	GO:0007030~Golgi organization	29	0.513093	0.0783662	USP6NL, TMED10, ATL3, LMAN2L, STX17, ATL2, ARL1, SYNE1, GOLGA5, CLASP2, ARFGEF1, RAB2A, DYNC2H1, TMED9, COG7, ATP8B2, CSNK1A1, COG4, SURF4, COG2, GOLPH3L, CSNK1D, RAB30, SEC23IP, NPLOC4, ZW10, GORASP1, TRIP11, PRKD1	4969	74	16792	1.32434	1	1	0.994256
GOTERM_BP_DIRECT	GO:0009060~aerobic respiration	15	0.265393	0.0798292	UCN, PANK2, ADSL, UQCRB, UQCRHL, UQCRH, CHCHD5, CAT, MTFR1, ME3, UQCRC2, MTFR2, NDUFV1, COX10, COX20	4969	33	16792	1.53607	1	1	0.994256
GOTERM_BP_DIRECT	GO:0071364~cellular response to epidermal growth factor stimulus	15	0.265393	0.0798292	BECN1, STAT5B, MCM7, CAD, ZFP36L2, ZFP36L1, EEF1A1, COL1A1, ZFP36, MYC, ID1, SNAI2, PLCG1, PDE8A, ZPR1	4969	33	16792	1.53607	1	1	0.994256
GOTERM_BP_DIRECT	GO:1903146~regulation of mitophagy	15	0.265393	0.0798292	SREBF1, BNIP3L, FBXW7, CSNK2A2, ACTL6A, U2AF1, WBP11, PINK1, POLR3A, SLC17A9, U2AF2, CTSK, RUVBL1, VDAC1, DNM1L	4969	33	16792	1.53607	1	1	0.994256
GOTERM_BP_DIRECT	GO:0051402~neuron apoptotic process	15	0.265393	0.0798292	RB1, APP, PIGT, USP53, DIABLO, AIFM1, ERBB3, CDK5, BCL2, BAX, NAE1, BID, GAPDH, TNFRSF21, TP63	4969	33	16792	1.53607	1	1	0.994256
GOTERM_BP_DIRECT	GO:0070555~response to interleukin-1	15	0.265393	0.0798292	IGBP1, PRKCI, CITED1, SRC, RIPK2, YTHDC2, MTHFR, CYBA, HNMT, GCLC, IRAK1, CD38, LGALS9, MYD88, SNCA	4969	33	16792	1.53607	1	1	0.994256
GOTERM_BP_DIRECT	GO:0006370~7-methylguanosine mRNA capping	15	0.265393	0.0798292	RNGTT, NCBP1, NCBP2, CCNH, SUPT5H, GTF2H4, GTF2H5, POLR2A, ERCC3, POLR2D, POLR2F, POLR2G, POLR2H, POLR2J, POLR2L	4969	33	16792	1.53607	1	1	0.994256
GOTERM_BP_DIRECT	GO:0051409~response to nitrosative stress	4	0.0707714	0.080576	GCLC, GCLM, ADH5, DUSP6	4969	4	16792	3.37935	1	1	0.994256
GOTERM_BP_DIRECT	GO:0006564~L-serine biosynthetic process	4	0.0707714	0.080576	PSAT1, SHMT2, PHGDH, PSPH	4969	4	16792	3.37935	1	1	0.994256
GOTERM_BP_DIRECT	GO:0046684~response to pyrethroid	4	0.0707714	0.080576	DDC, TH, SCN1B, SCN2B	4969	4	16792	3.37935	1	1	0.994256
GOTERM_BP_DIRECT	GO:1901991~negative regulation of mitotic cell cycle phase transition	4	0.0707714	0.080576	TPRA1, RGCC, ZFP36L2, ZFP36L1	4969	4	16792	3.37935	1	1	0.994256
GOTERM_BP_DIRECT	GO:0000154~rRNA modification	4	0.0707714	0.080576	NOP56, NOP58, NAT10, THUMPD1	4969	4	16792	3.37935	1	1	0.994256
GOTERM_BP_DIRECT	GO:0033625~positive regulation of integrin activation	4	0.0707714	0.080576	SRC, PLEK, PIEZO1, CXCL13	4969	4	16792	3.37935	1	1	0.994256
GOTERM_BP_DIRECT	GO:0007007~inner mitochondrial membrane organization	4	0.0707714	0.080576	CHCHD3, OPA1, MYC, MAIP1	4969	4	16792	3.37935	1	1	0.994256
GOTERM_BP_DIRECT	GO:0045876~positive regulation of sister chromatid cohesion	4	0.0707714	0.080576	SFPQ, FEN1, RAD21, DDX11	4969	4	16792	3.37935	1	1	0.994256
GOTERM_BP_DIRECT	GO:0006235~dTTP biosynthetic process	4	0.0707714	0.080576	DTYMK, CMPK2, TBPL1, TYMS	4969	4	16792	3.37935	1	1	0.994256
GOTERM_BP_DIRECT	GO:0031118~rRNA pseudouridine synthesis	4	0.0707714	0.080576	DKC1, GAR1, NHP2, NOP10	4969	4	16792	3.37935	1	1	0.994256
GOTERM_BP_DIRECT	GO:0010626~negative regulation of Schwann cell proliferation	4	0.0707714	0.080576	SKI, RNF10, DICER1, ASCL2	4969	4	16792	3.37935	1	1	0.994256
GOTERM_BP_DIRECT	GO:0060528~secretory columnal luminar epithelial cell differentiation involved in prostate glandular acinus development	4	0.0707714	0.080576	FOXA1, RXRA, NOTCH1, WDR77	4969	4	16792	3.37935	1	1	0.994256
GOTERM_BP_DIRECT	GO:0070254~mucus secretion	4	0.0707714	0.080576	VAMP8, AGR2, VAMP2, VAMP3	4969	4	16792	3.37935	1	1	0.994256
GOTERM_BP_DIRECT	GO:0051208~sequestering of calcium ion	4	0.0707714	0.080576	ATP7B, CASQ2, CALR, HSP90B1	4969	4	16792	3.37935	1	1	0.994256
GOTERM_BP_DIRECT	GO:0000466~maturation of 5.8S rRNA from tricistronic rRNA transcript (SSU-rRNA, 5.8S rRNA, LSU-rRNA)	4	0.0707714	0.080576	BOP1, PES1, WDR12, FTSJ3	4969	4	16792	3.37935	1	1	0.994256
GOTERM_BP_DIRECT	GO:0033522~histone H2A ubiquitination	4	0.0707714	0.080576	UBE2B, RNF8, UBR2, UBE2A	4969	4	16792	3.37935	1	1	0.994256
GOTERM_BP_DIRECT	GO:0007386~compartment pattern specification	4	0.0707714	0.080576	LFNG, NOTCH1, DLL1, DLL3	4969	4	16792	3.37935	1	1	0.994256
GOTERM_BP_DIRECT	GO:0051414~response to cortisol	4	0.0707714	0.080576	CAD, IGFBP7, SLIT3, SLIT2	4969	4	16792	3.37935	1	1	0.994256
GOTERM_BP_DIRECT	GO:0046602~regulation of mitotic centrosome separation	4	0.0707714	0.080576	CHEK1, NEK2, KIF11, CEP85	4969	4	16792	3.37935	1	1	0.994256
GOTERM_BP_DIRECT	GO:0090170~regulation of Golgi inheritance	4	0.0707714	0.080576	MAP2K1, MAP2K2, MAPK1, MAPK3	4969	4	16792	3.37935	1	1	0.994256
GOTERM_BP_DIRECT	GO:0043137~DNA replication, removal of RNA primer	4	0.0707714	0.080576	FEN1, RNASEH1, RNASEH2A, DNA2	4969	4	16792	3.37935	1	1	0.994256
GOTERM_BP_DIRECT	GO:0010906~regulation of glucose metabolic process	11	0.194621	0.0843492	IGFBP4, RORC, TFF3, SIK3, PDK4, PDK3, RORA, PASK, ACACB, SIRT1, PDK2	4969	22	16792	1.68968	1	1	0.994256
GOTERM_BP_DIRECT	GO:0006090~pyruvate metabolic process	11	0.194621	0.0843492	PDHX, LDHB, LDHA, PDHA1, GLO1, ME1, ME3, ME2, PDHB, SLC16A3, PCK2	4969	22	16792	1.68968	1	1	0.994256
GOTERM_BP_DIRECT	GO:2001243~negative regulation of intrinsic apoptotic signaling pathway	11	0.194621	0.0843492	HELLS, URI1, SRC, FIGNL1, PLAUR, NDUFS3, BCL2, PPIF, VDAC2, MMP9, BCL2L2	4969	22	16792	1.68968	1	1	0.994256
GOTERM_BP_DIRECT	GO:0007566~embryo implantation	18	0.318471	0.086464	IL11RA, MMP2, MST1, FBLN1, PCSK5, MMP9, TGFBR2, SOD1, TRO, CST3, RXRA, UBE2Q1, TRIM28, STC2, IGFBP7, RPL29, RECK, PPARD	4969	42	16792	1.44829	1	1	0.994256
GOTERM_BP_DIRECT	GO:0008299~isoprenoid biosynthetic process	8	0.141543	0.0873386	FDPS, COQ2, MVK, HMGCS1, GGPS1, MVD, PDSS1, HMGCS2	4969	14	16792	1.93106	1	1	0.994256
GOTERM_BP_DIRECT	GO:0071732~cellular response to nitric oxide	8	0.141543	0.0873386	CCNA2, AIFM1, KCNC2, CDK2, HNRNPD, TRAF2, AQP1, DNM2	4969	14	16792	1.93106	1	1	0.994256
GOTERM_BP_DIRECT	GO:0010839~negative regulation of keratinocyte proliferation	8	0.141543	0.0873386	INTU, KLF9, CASK, SNAI2, EPPK1, SFN, CTSV, SLURP1	4969	14	16792	1.93106	1	1	0.994256
GOTERM_BP_DIRECT	GO:0031573~intra-S DNA damage checkpoint	8	0.141543	0.0873386	MUS81, MDC1, TIPIN, MSH2, EME1, XPC, NEK11, RAD9A	4969	14	16792	1.93106	1	1	0.994256
GOTERM_BP_DIRECT	GO:0006937~regulation of muscle contraction	8	0.141543	0.0873386	MYL5, HSPB6, TNNT2, TNNC1, TPM1, TNNT3, PPP1R12B, MYL9	4969	14	16792	1.93106	1	1	0.994256
GOTERM_BP_DIRECT	GO:0010812~negative regulation of cell-substrate adhesion	8	0.141543	0.0873386	COL1A1, NOTCH1, DMTN, FZD4, TBCD, GCNT2, SPOCK1, MEN1	4969	14	16792	1.93106	1	1	0.994256
GOTERM_BP_DIRECT	GO:0000380~alternative mRNA splicing, via spliceosome	8	0.141543	0.0873386	PTBP1, HNRNPM, SFPQ, KDM1A, RSRC1, SRSF1, SLU7, PQBP1	4969	14	16792	1.93106	1	1	0.994256
GOTERM_BP_DIRECT	GO:0060065~uterus development	8	0.141543	0.0873386	CDKN1C, HOXA10, RBP4, SRC, LHX1, WNT5A, GATA3, ESR1	4969	14	16792	1.93106	1	1	0.994256
GOTERM_BP_DIRECT	GO:0060347~heart trabecula formation	8	0.141543	0.0873386	EGLN1, TGFBR3, RBP4, HEY1, FHL2, TEK, NKX2-5, OVOL2	4969	14	16792	1.93106	1	1	0.994256
GOTERM_BP_DIRECT	GO:0000910~cytokinesis	20	0.353857	0.0890091	BECN1, RALA, RALB, ARL3, NEK6, PLK1, KIF23, RAB11A, RHOB, KLHL9, DIAPH2, ZFYVE26, BIN3, ESPL1, INCENP, PRC1, RAB35, BIRC5, KIF20A, ECT2	4969	48	16792	1.40806	1	1	0.994256
GOTERM_BP_DIRECT	GO:0007569~cell aging	12	0.212314	0.0897247	MNT, CITED2, DNAJA3, NUP62, PDCD4, BCL2, CDK1, MIF, SIRT1, TBX3, SOD1, TBX2	4969	25	16792	1.62209	1	1	0.994256
GOTERM_BP_DIRECT	GO:0071158~positive regulation of cell cycle arrest	12	0.212314	0.0897247	RGCC, MYBBP1A, UHRF2, FAP, CDKN2A, PPP2R5B, BRCA1, FOXO4, CRLF3, PKD2, POU4F1, CDK5R1	4969	25	16792	1.62209	1	1	0.994256
GOTERM_BP_DIRECT	GO:0006306~DNA methylation	12	0.212314	0.0897247	HELLS, DNMT1, HENMT1, EHMT2, ATRX, BEND3, GNAS, DNMT3B, FOS, MTA2, EZH2, GATAD2A	4969	25	16792	1.62209	1	1	0.994256
GOTERM_BP_DIRECT	GO:0015914~phospholipid transport	12	0.212314	0.0897247	TMEM30A, PITPNM1, SCP2, OSBPL5, STARD7, PITPNB, TNFAIP8L3, TRIAP1, LDLR, PRELID3A, PITPNC1, PRELID3B	4969	25	16792	1.62209	1	1	0.994256
GOTERM_BP_DIRECT	GO:0015949~nucleobase-containing small molecule interconversion	12	0.212314	0.0897247	RRM1, DTYMK, RRM2, GUK1, TXNRD1, GLRX, CTPS1, AK5, TXN, AK8, AK9, NME1	4969	25	16792	1.62209	1	1	0.994256
GOTERM_BP_DIRECT	GO:0071277~cellular response to calcium ion	21	0.37155	0.0898767	MEF2A, JUN, MEF2C, DMTN, WNT5A, AKR1C3, BRAF, CACYBP, ADCY1, FOS, CARF, TRPM2, CPNE1, PPIF, FOSB, CAPN3, CPNE2, ECT2, SLC25A23, JUNB, KCNH1	4969	51	16792	1.3915	1	1	0.994256
GOTERM_BP_DIRECT	GO:0048511~rhythmic process	22	0.389243	0.0905245	TOP2A, CREBBP, KDM5C, NLGN1, HLF, NFYA, CSNK2A1, CBX3, PRKDC, CIPC, RORB, NFKB2, SFPQ, TEF, CDK5, SIN3A, SRRD, FBXL3, PPARG, BTRC, EZH2, CDK5R1	4969	54	16792	1.37677	1	1	0.994256
GOTERM_BP_DIRECT	GO:0048146~positive regulation of fibroblast proliferation	22	0.389243	0.0905245	PDGFRB, JUN, ANXA2, PRKDC, SPHK1, WNT5A, FBLN1, IGF1, MIF, CDC6, BMI1, ESR1, AQP1, CCNA2, CCNB1, CDK4, MYC, PDGFD, PDGFC, NDUFS4, GAS6, FGF10	4969	54	16792	1.37677	1	1	0.994256
GOTERM_BP_DIRECT	GO:0043401~steroid hormone mediated signaling pathway	23	0.406936	0.0909825	ESRRA, THRA, LEF1, RORC, NR2F1, RORA, ESRRG, RORB, NR2F2, NR2C2, BMP7, ESR1, NR2F6, NR3C2, NR4A2, BMP4, RXRA, NR5A2, GPER1, HNF4A, PGR, PPARG, PPARD	4969	57	16792	1.3636	1	1	0.994256
GOTERM_BP_DIRECT	GO:0045732~positive regulation of protein catabolic process	24	0.424628	0.0912761	BARD1, GSK3B, MYLIP, VCP, CDKN1B, EGLN2, RHBDD3, CSNK2A1, TIPARP, PLK2, WNT5A, LPCAT1, TNFAIP3, NEDD4L, SNF8, OAZ1, SORL1, GJA1, SNX1, GGA3, SOX17, CREBRF, GPC3, VIP	4969	60	16792	1.35174	1	1	0.994256
GOTERM_BP_DIRECT	GO:0009611~response to wounding	25	0.442321	0.0914269	CX3CR1, NRP1, SLC1A3, ADM, ZFP36L2, AURKA, ZFP36L1, HHEX, ZFP36, MYC, CCR1, MAP2K4, VWF, DST, PLLP, NMNAT3, LYVE1, POU5F1, SULF2, NMNAT1, FABP5, CDK5, ID3, SRSF5, F2RL2	4969	63	16792	1.34101	1	1	0.994256
GOTERM_BP_DIRECT	GO:0050790~regulation of catalytic activity	26	0.460014	0.0914533	GPSM2, BECN1, MTMR9, PPP2R2A, AUP1, GRPEL1, PPP1R7, GRPEL2, CAPN3, SH3BP4, SLAMF1, CBX8, RING1, PPP2R5B, PPP2R3B, PPP2R5D, PPP2R5C, SOD2, PCP2, AR, PPP1R3C, PPP1R3B, DNAJA3, RCAN2, RCAN3, RLN2	4969	66	16792	1.33126	1	1	0.994256
GOTERM_BP_DIRECT	GO:0000463~maturation of LSU-rRNA from tricistronic rRNA transcript (SSU-rRNA, 5.8S rRNA, LSU-rRNA)	6	0.106157	0.0937527	BOP1, PES1, RPF2, WDR12, GTPBP4, FTSJ3	4969	9	16792	2.2529	1	1	0.994256
GOTERM_BP_DIRECT	GO:0071243~cellular response to arsenic-containing substance	6	0.106157	0.0937527	GSTO2, ZFAND2A, MKNK2, PPIF, HMOX1, CPEB2	4969	9	16792	2.2529	1	1	0.994256
GOTERM_BP_DIRECT	GO:0036444~calcium ion transmembrane import into mitochondrion	6	0.106157	0.0937527	AFG3L2, MCUR1, MICU2, SLC25A23, MAIP1, MCU	4969	9	16792	2.2529	1	1	0.994256
GOTERM_BP_DIRECT	GO:0030071~regulation of mitotic metaphase/anaphase transition	6	0.106157	0.0937527	CENPE, UBE2C, NEK6, PLK1, ANAPC4, CDC6	4969	9	16792	2.2529	1	1	0.994256
GOTERM_BP_DIRECT	GO:0002098~tRNA wobble uridine modification	6	0.106157	0.0937527	CTU2, CTU1, MOCS3, ELP3, GTPBP3, ALKBH8	4969	9	16792	2.2529	1	1	0.994256
GOTERM_BP_DIRECT	GO:1904668~positive regulation of ubiquitin protein ligase activity	6	0.106157	0.0937527	CDC20, UBE2C, UBE2S, PLK1, PTEN, CDC14B	4969	9	16792	2.2529	1	1	0.994256
GOTERM_BP_DIRECT	GO:0045047~protein targeting to ER	6	0.106157	0.0937527	SEC61A1, SPCS1, SEC61G, PMM2, SRP68, SRP14	4969	9	16792	2.2529	1	1	0.994256
GOTERM_BP_DIRECT	GO:0034101~erythrocyte homeostasis	6	0.106157	0.0937527	GPI, PRDX1, IREB2, HMOX1, HOXB6, RPS24	4969	9	16792	2.2529	1	1	0.994256
GOTERM_BP_DIRECT	GO:0015886~heme transport	6	0.106157	0.0937527	SLC48A1, HPX, ABCB6, FLVCR1, FLVCR2, ABCG2	4969	9	16792	2.2529	1	1	0.994256
GOTERM_BP_DIRECT	GO:0051561~positive regulation of mitochondrial calcium ion concentration	6	0.106157	0.0937527	BCAP31, FIS1, MCUR1, MICU2, MCU, TGM2	4969	9	16792	2.2529	1	1	0.994256
GOTERM_BP_DIRECT	GO:0009651~response to salt stress	6	0.106157	0.0937527	HSP90AA1, HSP90AB1, TH, BAX, ANXA7, TNF	4969	9	16792	2.2529	1	1	0.994256
GOTERM_BP_DIRECT	GO:2000737~negative regulation of stem cell differentiation	6	0.106157	0.0937527	YAP1, NOTCH1, JAG1, STAT3, HES1, ZFP36L2	4969	9	16792	2.2529	1	1	0.994256
GOTERM_BP_DIRECT	GO:0032886~regulation of microtubule-based process	6	0.106157	0.0937527	DIAPH1, GSK3B, MACF1, MEMO1, CLASP2, KLHL42	4969	9	16792	2.2529	1	1	0.994256
GOTERM_BP_DIRECT	GO:0035457~cellular response to interferon-alpha	6	0.106157	0.0937527	OAS1, GATA3, GAS6, IFIT3, IFIT2, IFNAR1	4969	9	16792	2.2529	1	1	0.994256
GOTERM_BP_DIRECT	GO:0033673~negative regulation of kinase activity	6	0.106157	0.0937527	CDKN1C, PRDX3, CDKN1B, NPRL2, IRS2, CSK	4969	9	16792	2.2529	1	1	0.994256
GOTERM_BP_DIRECT	GO:0006111~regulation of gluconeogenesis	6	0.106157	0.0937527	NLN, LEP, ACADM, FBP1, PDK2, GNMT	4969	9	16792	2.2529	1	1	0.994256
GOTERM_BP_DIRECT	GO:0006569~tryptophan catabolic process	6	0.106157	0.0937527	TDO2, AADAT, KYNU, KYAT1, IDO1, ACMSD	4969	9	16792	2.2529	1	1	0.994256
GOTERM_BP_DIRECT	GO:0016050~vesicle organization	13	0.230007	0.0939969	CAV2, CAV1, SNX10, SNX33, SNX30, SNX1, PINK1, ZFYVE16, SNX2, FBXO5, EPS15, SNX8, SNX5	4969	28	16792	1.56898	1	1	0.994256
GOTERM_BP_DIRECT	GO:0051881~regulation of mitochondrial membrane potential	13	0.230007	0.0939969	PANK2, PID1, TUSC2, PYCR1, PARK7, SOD2, SOD1, PRDX3, PINK1, BCL2, BAX, BAK1, STOX1	4969	28	16792	1.56898	1	1	0.994256
GOTERM_BP_DIRECT	GO:0016567~protein ubiquitination	119	2.10545	0.094379	UBE2D4, KLHL36, LRR1, UBE2D2, KLHDC7B, DCAF5, DCAF4, DCAF7, TRIM28, HERC1, TRIM24, FBXO4, BTRC, SKP1, TRIM23, MYLIP, FBXW7, MED8, NSMCE1, FBXO11, MID2, FBXW2, KLHL41, CCNB1IP1, TRAIP, MED7, CDC34, UBE2V2, CBLL1, TRIM11, VCP, CDCA3, ANAPC16, UBA6, KLHL17, CUL1, NEDD4L, DTX2, DTX3, ANAPC11, SOCS2, VCPIP1, RNF213, SOCS1, MED30, UBR7, UBD, RNF170, SOCS7, SOCS5, BARD1, KLHL29, UBE2B, KLHL25, UBE2C, KL…	4969	359	16792	1.12018	1	1	0.994256
GOTERM_BP_DIRECT	GO:0007568~aging	58	1.02619	0.0951534	CDKN1C, CD86, ITGB2, NUDT1, PTEN, ADM, ABAT, PTH1R, FGF2, CASP9, EDNRB, OPA1, SIN3A, LONP1, FBXO4, TIMP2, TSPO, FADS1, CTSC, POLG, SREBF1, TPRA1, NPY5R, SERPINF1, CACYBP, FOS, GLRX2, DCN, TGFBR2, CAT, RPN2, LRP1, FOXO4, TYMS, AURKB, SRR, IRAK1, PENK, CTNNA1, APOD, BAK1, SNCA, SLC12A2, JUN, TGFB3, STAT3, EEF2, ASS1, NFKB2, SOD1, COL3A1, GCLC, CARM1, KRT14, GRB2, GCLM, HAMP, ADA	4969	165	16792	1.18789	1	1	0.994256
GOTERM_BP_DIRECT	GO:0042789~mRNA transcription from RNA polymerase II promoter	9	0.159236	0.0975694	SREBF1, SOX17, SOX18, DDIT3, LMO2, STAT3, FLNA, POU5F1, ATF4	4969	17	16792	1.78907	1	1	0.994256
GOTERM_BP_DIRECT	GO:0006171~cAMP biosynthetic process	9	0.159236	0.0975694	RAMP2, ADCY9, CALCRL, ADCY4, ADM, ADCY2, ADCY1, ADCY7, ADCY6	4969	17	16792	1.78907	1	1	0.994256
GOTERM_BP_DIRECT	GO:0048514~blood vessel morphogenesis	9	0.159236	0.0975694	TBX1, GJA1, SYK, CDH2, COL4A1, RASA1, ID1, NR2F2, SOS1	4969	17	16792	1.78907	1	1	0.994256
GOTERM_BP_DIRECT	GO:0006337~nucleosome disassembly	9	0.159236	0.0975694	SMARCE1, SMARCD2, SUPT16H, SET, SMARCB1, SMARCC2, SMARCD3, HMGA1, SMARCA4	4969	17	16792	1.78907	1	1	0.994256
